# Supplementary material for: Frailty degree and illness trajectories in older people towards the end-of-life: a prospective observational study
Source: PubMed Central journal article supplement — BMJ Open. 2021 Apr 21;11(4):e042645. doi: 10.1136/bmjopen-2020-042645 (PMC8061834; doi:10.1136/bmjopen-2020-042645), 2021-04-21
Supplement: bmjopen-2020-042645.draft_revisions.pdf [file bmjopen-2020-042645.draft_revisions.pdf]

# BMJ Open

BMJ Open is committed to open peer review. As part of this commitment we make the peer review history of every article we publish publicly available.

When an article is published we post the peer reviewers' comments and the authors' responses online. We also post the versions of the paper that were used during peer review. These are the versions that the peer review comments apply to.

The versions of the paper that follow are the versions that were submitted during the peer review process. They are not the versions of record or the final published versions. They should not be cited or distributed as the published version of this manuscript.

BMJ Open is an open access journal and the full, final, typeset and author-corrected version of record of the manuscript is available on our site with no access controls, subscription charges or pay-per-view fees (<http://bmjopen.bmj.com>).

If you have any questions on BMJ Open's open peer review process please email [info.bmjopen@bmj.com](mailto:info.bmjopen@bmj.com)

# BMJ Open

## Frailty degree and illness trajectories in older people towards the end-of-life: a prospective observational study

|                               |                                                                                                                                                                                                                                                                                                                                                                                                                                                                                                                                                                                                                                                                                                                                                                                                                                                                                                                                                                                                                                                                                                                                                                                                                                                                                                                                                                                                                                                                                                                                                                                                                                                                                                                                                                                                                                                                          |
|-------------------------------|--------------------------------------------------------------------------------------------------------------------------------------------------------------------------------------------------------------------------------------------------------------------------------------------------------------------------------------------------------------------------------------------------------------------------------------------------------------------------------------------------------------------------------------------------------------------------------------------------------------------------------------------------------------------------------------------------------------------------------------------------------------------------------------------------------------------------------------------------------------------------------------------------------------------------------------------------------------------------------------------------------------------------------------------------------------------------------------------------------------------------------------------------------------------------------------------------------------------------------------------------------------------------------------------------------------------------------------------------------------------------------------------------------------------------------------------------------------------------------------------------------------------------------------------------------------------------------------------------------------------------------------------------------------------------------------------------------------------------------------------------------------------------------------------------------------------------------------------------------------------------|
| Journal:                      | <i>BMJ Open</i>                                                                                                                                                                                                                                                                                                                                                                                                                                                                                                                                                                                                                                                                                                                                                                                                                                                                                                                                                                                                                                                                                                                                                                                                                                                                                                                                                                                                                                                                                                                                                                                                                                                                                                                                                                                                                                                          |
| Manuscript ID                 | bmjopen-2020-042645                                                                                                                                                                                                                                                                                                                                                                                                                                                                                                                                                                                                                                                                                                                                                                                                                                                                                                                                                                                                                                                                                                                                                                                                                                                                                                                                                                                                                                                                                                                                                                                                                                                                                                                                                                                                                                                      |
| Article Type:                 | Original research                                                                                                                                                                                                                                                                                                                                                                                                                                                                                                                                                                                                                                                                                                                                                                                                                                                                                                                                                                                                                                                                                                                                                                                                                                                                                                                                                                                                                                                                                                                                                                                                                                                                                                                                                                                                                                                        |
| Date Submitted by the Author: | 10-Jul-2020                                                                                                                                                                                                                                                                                                                                                                                                                                                                                                                                                                                                                                                                                                                                                                                                                                                                                                                                                                                                                                                                                                                                                                                                                                                                                                                                                                                                                                                                                                                                                                                                                                                                                                                                                                                                                                                              |
| Complete List of Authors:     | <p>Amblàs-Novellas, Jordi; Hospital General de Vic, ; Universitat de Vic - Universitat Central de Catalunya,</p> <p>Murray, Scott; The University of Edinburgh, Primary Palliative Care Research Group, The Usher Institute of Population Health Sciences and Informatics</p> <p>Torné, Anna; Universitat de Vic - Universitat Central de Catalunya, Central Catalonia Chronicity Research Group (C3RG), Centre for Health and Social Care Research (CESS); Hospital General de Vic, Geriatric and Palliative Care Department</p> <p>Martori, Joan Carles; Universitat de Vic - Universitat Central de Catalunya, Data Analysis and Modeling Research Group</p> <p>Moine, Sébastien ; The University of Edinburgh, Primary Palliative Care Research Group, The Usher Institute of Population Health Sciences and Informatics</p> <p>Oller, Ramon; Universitat de Vic - Universitat Central de Catalunya, Data Analysis and Modelling Research Group. Department of Economics and Business</p> <p>Latorre, Nadina; Universitat de Vic - Universitat Central de Catalunya, Central Catalonia Chronicity Research Group (C3RG), Centre for Health and Social Care Research (CESS); Hospital General de Vic, Geriatric and Palliative Care Department</p> <p>Espauella, Joan; Universitat de Vic - Universitat Central de Catalunya, Central Catalonia Chronicity Research Group (C3RG), Centre for Health and Social Care Research (CESS); Hospital Universitari de Vic, Geriatric and Palliative Care Department</p> <p>Santaeugènia, Sebastià; Badalona Serveis Assistencials SA, Department of Geriatric Medicine and Palliative Care; Universitat de Vic - Universitat Central de Catalunya, Chronicity Research Group (C3RG), Centre for Health and Social Care Research (CESS)</p> <p>Gómez-Batiste, Xavier; University of Vic - Central University of Catalonia,</p> |
| Keywords:                     | GERIATRIC MEDICINE, Adult palliative care < PALLIATIVE CARE, Quality in health care < HEALTH SERVICES ADMINISTRATION & MANAGEMENT                                                                                                                                                                                                                                                                                                                                                                                                                                                                                                                                                                                                                                                                                                                                                                                                                                                                                                                                                                                                                                                                                                                                                                                                                                                                                                                                                                                                                                                                                                                                                                                                                                                                                                                                        |
|                               |                                                                                                                                                                                                                                                                                                                                                                                                                                                                                                                                                                                                                                                                                                                                                                                                                                                                                                                                                                                                                                                                                                                                                                                                                                                                                                                                                                                                                                                                                                                                                                                                                                                                                                                                                                                                                                                                          |

1  
2  
3  
4  
5  
6  
7  
8  
9  
10  
11  
12  
13  
14  
15  
16  
17  
18  
19  
20  
21  
22  
23  
24  
25  
26  
27  
28  
29  
30  
31  
32  
33  
34  
35  
36  
37  
38  
39  
40  
41  
42  
43  
44  
45  
46  
47  
48  
49  
50  
51  
52  
53  
54  
55  
56  
57  
58  
59  
60

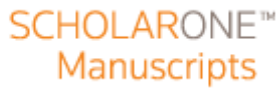

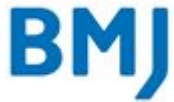

I, the Submitting Author has the right to grant and does grant on behalf of all authors of the Work (as defined in the below author licence), an exclusive licence and/or a non-exclusive licence for contributions from authors who are: i) UK Crown employees; ii) where BMJ has agreed a CC-BY licence shall apply, and/or iii) in accordance with the terms applicable for US Federal Government officers or employees acting as part of their official duties; on a worldwide, perpetual, irrevocable, royalty-free basis to BMJ Publishing Group Ltd ("BMJ") its licensees and where the relevant Journal is co-owned by BMJ to the co-owners of the Journal, to publish the Work in this journal and any other BMJ products and to exploit all rights, as set out in our [licence](#).

The Submitting Author accepts and understands that any supply made under these terms is made by BMJ to the Submitting Author unless you are acting as an employee on behalf of your employer or a postgraduate student of an affiliated institution which is paying any applicable article publishing charge ("APC") for Open Access articles. Where the Submitting Author wishes to make the Work available on an Open Access basis (and intends to pay the relevant APC), the terms of reuse of such Open Access shall be governed by a Creative Commons licence – details of these licences and which [Creative Commons](#) licence will apply to this Work are set out in our licence referred to above.

Other than as permitted in any relevant BMJ Author's Self Archiving Policies, I confirm this Work has not been accepted for publication elsewhere, is not being considered for publication elsewhere and does not duplicate material already published. I confirm all authors consent to publication of this Work and authorise the granting of this licence.

# Frailty Degree and Illness Trajectories in Older People towards the End-of-life: a Prospective Observational Study

## Authors

Jordi Amblàs-Novellas<sup>1,2,3,4</sup>, Scott A. Murray<sup>5</sup>, Anna Torné<sup>1,3</sup>, Joan Carles Martori<sup>6</sup>, Sébastien Moine<sup>5</sup>, Ramon Oller<sup>6</sup>, Nadina Latorre<sup>1,3</sup>, Joan Espauella<sup>1,2,3</sup>, Sebastià Santaegènia<sup>1,4</sup>, Xavier Gómez-Batiste<sup>1,2</sup>

## Affiliations

1. Central Catalonia Chronicity Research Group (C3RG), Centre for Health and Social Care Research (CESS), University of Vic/Central University of Catalonia (UVIC-UCC). Vic, Barcelona, Spain.
2. Chair and Department of Palliative Care, University of Vic/Central University of Catalonia (UVIC-UCC). Vic, Barcelona, Spain
3. Geriatric and Palliative Care Department, Hospital Universitari de la Santa Creu and Hospital Universitari de Vic. Vic, Barcelona, Spain
4. Chronic Care Program, Ministry of Health, Generalitat de Catalunya, Catalonia, Spain
5. Primary Palliative Care Research Group, The Usher Institute of Population Health Sciences and Informatics, The University of Edinburgh, UK
6. Data Analysis and Modeling Research Group. Department of Economics and Business, University of Vic/Central University of Catalonia (UVIC-UCC). Vic, Barcelona, Spain

1  
2  
3  
4  
5  
6 **Corresponding autor:** Jordi Amblàs-Novellas. Central Catalonia Chronicity Research  
7  
8 Group (C3RG), Centre for Health and Social Care Research (CESS), Universitat de Vic.  
9  
10 University of Vic/Central University of Catalonia (UVIC-UCC). Rambla Hospital 52,  
11  
12 08500 Vic, Barcelona. Spain.  
13  
14

15  
16 Email: [jordiamblas@gmail.com](mailto:jordiamblas@gmail.com)  
17  
18  
19  
20  
21  
22  
23  
24  
25  
26  
27  
28  
29  
30  
31  
32  
33  
34  
35  
36  
37  
38  
39  
40  
41  
42  
43  
44  
45  
46  
47  
48  
49  
50  
51  
52  
53  
54  
55  
56  
57  
58  
59  
60

## Abstract

**Objectives:** To assess the degree of frailty in older people with different advanced diseases and its relationship with end-of-life illness trajectories and survival.

**Methods:** Prospective, observational study, including all patients admitted to the Acute Geriatric Unit of the University Hospital of Vic (Barcelona, Spain) during 12 consecutive months in 2014 - 2015. The Frail-VIG index, based on 22 questions assessing 25 different deficits, was used to quantify frailty degree, and participants with palliative care needs were identified using the NECPAL tool. Participants were classified according to their Frail-VIG index scores into 4 groups (i.e., no frailty, mild frailty, moderate frailty, and advanced frailty) and their dominant illness trajectory and followed for up to 2 years, until 2017.

**Results:** Of the 590 persons with a mean (SD) age of 86.4 (5.6) years recruited, 260 (44.1%) were identified as people with palliative care needs, distributed into cancer (n=31, 11.9%), organ failure (n=79, 30.4%), dementia (n=86, 33.1%), and multimorbidity (n=64, 24.6%) categories. Regardless of the illness trajectory, all 260 people had some degree of frailty, mostly advanced frailty (n=184, 70.8%), and 220 (84.6%) died within two years. The survival curves showed a significant relationship between frailty degree and survival ( $X^2=69.9$ ,  $p<0.0001$ ) and differences in the frailty degree between the four illness trajectories ( $X^2=12.1$ ,  $p=0.007$ ), revealing different patterns of survival decline according to the frailty degree.

**Conclusions:** Advanced frailty occurs in all illness trajectories in older people. Frailty indexes may be useful to assess end-of-life older people, regardless of their trajectory.

1  
2  
3 The survival pattern of people with multimorbidity could support the description of a new  
4  
5 composite illness trajectory.  
6  
7

8 **Keywords:** Frailty, palliative care, mortality, multimorbidity, longitudinal study  
9  
10  
11  
12  
13  
14

## 15 **Strengths and Limitations of this Study**

16  
17  
18

- 19 • To our knowledge, this is the first study that evaluated the degree of frailty (no frailty,  
20 mild frailty, moderate frailty, and advanced frailty) using a frailty index in patients  
21 with different advanced illness trajectories.  
22  
23
- 24 • This is a real-life study, using tools routinely applied in the Acute Geriatric Unit  
25 conducting this study: the NECPAL, to identify people with palliative care needs,  
26 and the Frail-VIG index, to measure the degree of frailty and personalization of the  
27 interventions.  
28  
29
- 30 • In this context, assessing frailty degree may contribute to establish a common  
31 language between geriatric and palliative knowledge, with the goal of providing a  
32 better care for older people with palliative care needs, specially those in the first end-  
33 of-life transition.  
34  
35
- 36 • The use of a single computer system collecting the mortality status reported by all  
37 health providers prevented loss of patients and missing data, increasing the accuracy  
38 of the results.  
39  
40
- 41 • Study limitations include bias in the study population towards older patients and a  
42 study sample with particular sociodemographic characteristics, due to the limited  
43 area covered by the participating hospital, potentially limiting the generalizability of  
44 the results.  
45  
46  
47  
48  
49  
50  
51  
52  
53  
54  
55  
56  
57  
58  
59  
60



## INTRODUCTION

The model of care for patients with advanced chronic conditions is currently shifting towards a new paradigm, characterized by early identification of persons with any disease or chronic condition who would benefit from palliative care [1,2]—this corresponds to the first transition in palliative care. Despite the benefits of this early identification,[3]the increasing number of people with palliative care needs, together with their high heterogeneity regarding age, needs, diseases, and chronic illnesses, poses novel challenges for early identification and assessment of these patients.[4,5] Indeed, the progression towards the end of life is conditioned by multiple variables and is strictly individual: not all people age in the same way nor reach the final situation with the same circumstances or needs.[6]

In the context of this new paradigm of “early palliative care”, some authors have pointed to frailty as a crucial concept for persons needing palliative care —particularly older people with multimorbidity—, their caregivers, and healthcare professionals, to learn to manage the uncertainty and complexity of these end-of-life situations.[7–9] Given the relationship between mortality and frailty,[10] the concept of frailty has been proposed as a criterion useful in the three key steps ensuring good palliative care,[5,6,11,12] including 1) early identification of persons in end-of-life situation (particularly in cases of advanced frailty); 2) multidimensional assessment and situational diagnosis; and 3) drafting an advanced care plan and sharing decision-making.

Regardless of the proposed uses of frailty as an indicator, palliative care and geriatrics have traditionally used this concept, albeit with different perspectives.[8] In the setting of palliative care, frailty has equated to the third end-of-life trajectory and defined as the gradual decline in physical function, typically associated with dementia.[13,14] In

1  
2  
3 contrast, from the geriatric perspective, frailty is rather a multidimensional clinical entity  
4 defined as a vulnerability state against stressing factors due to limited compensatory  
5 mechanisms.[15] Of the multiple instruments developed to assess frailty, frailty indexes  
6 (i.e., the ratio between accumulated deficits in a given person and the total possible  
7 deficits) may have utility in identifying people with frailty for end-of-life care across all  
8 disease groups.[8,16]  
9

10  
11  
12 A better understanding of how to provide the best palliative care for frail older people has  
13 become an international priority,[17] and the concept of frailty is increasingly  
14 acknowledged as a cornerstone in the assessment and care of persons in an end-of-life  
15 situation and needing palliative care.[15,18] However, a consensus on how to use the  
16 concept of frailty to provide palliative care to end-of-life people remains to be  
17 established.[15,19] In this study, aimed at improving the care of end-of-life people in  
18 general, we tested the hypothesis that all end-of-life people are significantly frail  
19 irrespective of their underlying diseases and that their frailty is measurable and related to  
20 their prognosis.  
21  
22  
23  
24  
25  
26  
27  
28  
29  
30  
31  
32  
33  
34  
35  
36  
37  
38

## 39 **METHODS**

### 40 **Study Design and Participants**

41  
42  
43  
44 This was a prospective, observational study, including all patients admitted to the Acute  
45 Geriatric unit (AGU) at the University Hospital of Vic (Barcelona, Spain) during 12  
46 consecutive months (January 2014 – January 2015). The University Hospital of Vic is a  
47 200-bed acute care hospital covering a population area of 156,000 inhabitants. Admission  
48 criteria to the AGU were age  $\geq$  85 years, cognitive decline, and/or end-of-life situation;  
49 no exclusion criteria were defined. The methods, including study design, variables, data  
50  
51  
52  
53  
54  
55  
56  
57  
58  
59  
60

1  
2  
3 sources, and study size have been described in a previous study conducted in the same  
4  
5 setting.[20] The study results are reported according to the Strengthening the Reporting  
6  
7 of Observational Studies in Epidemiology (STROBE) recommendations.[21] All patients  
8  
9 and family relatives of patients with advanced dementia situation ( $GDS \geq 6$ ) signed the  
10  
11 written informed consent for participation before any data was recorded. The study  
12  
13 protocol was approved by the Ethics Committee of the University Hospital of Vic  
14  
15 (2,014,850 PR80); this study was conducted in accordance with the Helsinki Declaration  
16  
17 and the local Personal Data Protection Law (LOPD 15/1999).  
18  
19  
20  
21  
22

### 23 **Patient and Public Involvement**

24  
25  
26 This research was done without patient involvement. Patients were not invited to  
27  
28 comment on the study design and were not consulted to develop patient relevant outcomes  
29  
30 or interpret the results. Patients were not invited to contribute to the writing or editing of  
31  
32 this document for readability or accuracy.  
33  
34  
35  
36

### 37 **Variables and Data Sources**

38  
39  
40  
41 Frailty was assessed using the Frail-VIG index, a tool consisting in 22 questions to assess  
42  
43 25 deficits commonly associated with age and adverse health outcomes, based on the  
44  
45 cumulative deficit model of frailty. The Frail-VIG index is a continuous variable ranging  
46  
47 from 0 to 1 and classified into 4 groups: no frailty (Frail-VIG index score  $<0.2$ ), mild  
48  
49 frailty (Frail-VIG index score 0.2-0.35), moderate frailty (Frail-VIG index score 0.36-  
50  
51 0.5), and advanced frailty (Frail-VIG index score  $>0.5$ ) [20]. End-of-life people were  
52  
53 identified using the NECPAL tool, a validated tool for the early identification of the need  
54  
55 for palliative care among individuals with limited life expectancy.[22,23] End-of-life  
56  
57 people were classified into the 3 archetypal end-of-life trajectories according to the  
58  
59  
60

1  
2  
3 severity and/or progression criteria for their main underlying disease: cancer, organ  
4 failure (including chronic pulmonary disease, chronic heart disease, serious chronic liver  
5 disease, and serious chronic renal disease), and dementia (including other chronic  
6 neurological diseases). People with palliative care needs without a predominant advanced  
7 disease were identified as "multimorbidity" group or trajectory, since all had 2 or more  
8 underlying chronic conditions.  
9

10  
11  
12 After inclusion of the last patient in the study (i.e., last admitted patient in the AGU before  
13 January 15th, 2015) and before starting data analysis in 2017, patients were followed for  
14 up to 24 months (2015 - beginning 2017). Information regarding the patient status after  
15 the 24-month follow-up period was obtained from the Shared Medical Record in  
16 Catalonia (HC3), a sole electronic database accessible to all healthcare providers in  
17 Catalonia that allows healthcare professionals to reliably determine whether a patient is  
18 "active" (alive) or deceased (including date of death).[24]  
19  
20  
21  
22  
23  
24  
25  
26  
27  
28  
29  
30  
31  
32  
33  
34  
35  
36  
37  
38

### 39 **Statistical Analysis**

40 Qualitative variables were presented as frequencies and percentages, whereas quantitative  
41 variables were presented as the mean and the standard deviation (SD). Qualitative  
42 variables were compared using the Pearson's chi-squared test. The relationship between  
43 frailty degree and survival has been evaluated using the C-statistics (to analyze the  
44 concordance), the log-rank test (to evaluate the association) and the ROC curves (to  
45 measure the prognostic capability of mortality at 24 months). Survival curves were  
46 plotted using the Kaplan-Meier estimator, and compared using the log-rank test. The  
47 significance level for all analyses was set at a two-sided  $\alpha=0.05$ . The descriptive statistics  
48 analysis of the variables was performed using the SPSS software program (IBM; Chicago,  
49  
50  
51  
52  
53  
54  
55  
56  
57  
58  
59  
60

1  
2  
3 IL; USA), and the survival analysis was performed using the Survival, pROC, and RMS  
4  
5 packages from the R project (<https://www.r-project.org>).  
6  
7

## 8 9 **RESULTS**

### 10 11 12 13 **Patient Characteristics and End-of-life Status**

14  
15  
16  
17 The study included 590 patients with a mean (SD, range) age of 86.4 (5.6, 48-105) years,  
18  
19 of whom 339 (57.5%) were women. Based on the Frail-VIG index scores, 543 (92%)  
20  
21 patients showed some degree of frailty, with 111 (18.8%), 207 (35.1%), and 225 (38.1%)  
22  
23 patients showing mild, moderate and advanced frailty, respectively. Of the 590 patients  
24  
25 included, 53 (8.9%) died during hospitalization, and 260 (44.1%) were identified as end-  
26  
27 of-life people; of these, 31 (11.9%), 79 (30.4%), 86 (33.1%), and 64 (24.6%) were  
28  
29 classified in cancer, organ failure, dementia, and multimorbidity illness trajectories,  
30  
31 respectively.  
32  
33  
34  
35  
36

### 37 **Relationship between End-of-life Status and Patient Characteristics**

38  
39  
40 End-of-life people and non-end-of-life people had similar mean age (86.3 and 86.5 years,  
41  
42 respectively) and sex frequencies (54.6% and 59.7% females, respectively), but differed  
43  
44 in the distribution among the 4 frailty groups: all end-of-life people (260) and 283  
45  
46 (85.8%) of the 330 non-end-of-life people were frail to some extent, with 252 (96.9%)  
47  
48 and 180 (54.5%) showing moderate or advanced frailty in the end-of-life people and non-  
49  
50 end-of-life people group, respectively. Table 1 summarizes the frequencies of end-of-life  
51  
52 and non-end-of-life people across the various frailty categories.  
53  
54  
55  
56  
57

58 **Table 1.** Classification of study patients according to the Frail-VIG index scores  
59  
60

---

and end-of-life status (n=590), n (%)

|         | No frail  | Mild Frailty | Moderate Frailty | Advanced Frailty |
|---------|-----------|--------------|------------------|------------------|
| EOLp    | 0 (0)     | 8 (3.1)      | 68 (26.1)        | 184 (70.8)       |
| NonEOLp | 47 (14.3) | 103 (31.2)   | 139 (42.1)       | 41 (12.4)        |

EOLp: End-of-life people, NonEOLp: Non End-of-life people

Correspondingly, median Frail-VIG index scores were significantly higher in end-of-life compared to non-end-of-life people: 0.56 and 0.36, respectively ( $p < 0.001$ ). In end-of-life people, the predominant frailty degree was persistently advanced for all end-of-life trajectory categories: cancer, organ failure, dementia, and multimorbidity (range 68-75%) (Table 2). All end-of-life people in the multimorbidity trajectory (n=64) were classified in the moderate and advanced frailty groups.

**Table 2.** Classification of end-of-life people according to Frail-VIG index scores and end-of-life trajectory (n=260), n (%)

|               | No frail | Mild Frailty | Moderate Frailty | Advanced Frailty | Total     |
|---------------|----------|--------------|------------------|------------------|-----------|
| Cancer        | 0 (0)    | 3 (9.7)      | 7 (22.6)         | 21 (67.7)        | 31 (11.9) |
| Organ Failure | 0 (0)    | 4 (5.1)      | 20 (25.3)        | 55 (69.6)        | 79 (30.4) |

|                |       |         |           |            |           |
|----------------|-------|---------|-----------|------------|-----------|
| Dementia       | 0 (0) | 1 (1.1) | 25 (29.1) | 60 (69.8)  | 86 (33.1) |
| Multimorbidity | 0 (0) | 0 (0)   | 16 (25.0) | 48 (75.0)  | 64 (24.6) |
| Total          | 0 (0) | 8 (3.1) | 68 (26.1) | 184 (70.8) | 260       |

### Relationship between Frailty Degree and Survival

During the 2-year follow up period, a total of 338 (57.3%) study patients died. Mortality was significantly higher in end-of-life people than in non-end-of-life people: 220 (84.6%) and 118 (35.7%), respectively ( $p < 0.001$ ). The log-rank test comparing the survival curves of each frailty degree revealed significant differences in the overall population ( $X^2 = 423$ ,  $p < 0.0001$ ), end-of-life people ( $X^2 = 69.9$ ,  $p < 0.0001$ ), and non-end-of-life people ( $X^2 = 122$ ,  $p < 0.0001$ ) (Figure 1). Correspondingly, the C coefficient for concordance between the survival time and the Frail-VIG score was 0.8, indicating that higher scores of the Frail-VIG index are associated with lower survival.

Survival curves differed among the different end-of-life trajectories, including the 3 archetypal end-of-life trajectories and the multimorbidity trajectory ( $X^2 = 12.1$ ,  $p = 0.007$ ), revealing different patterns of survival decline according to the frailty degree (Figure 2). Specifically, the presence of moderate or advanced frailty resulted in important differences in survival in dementia and multimorbidity end-of-life trajectory patients, but not in cancer end-of-life trajectory ones. Also, regardless of the frailty groups, deaths in the cancer end-of-life trajectory accumulated quickly, whereas in the other trajectories accumulated more progressively. The frequencies of death at the end of the 2-year follow-up period for each trajectory in end-of-life people are presented in Table 3.

**Table 3.** Status of end-of-life people according to the Frail-VIG index scores and end-of-life trajectory after the 2-year follow-up (n=260), n (%)

|                | n  | Status | Mild Frailty | Moderate Frailty | Advanced Frailty | Total     |
|----------------|----|--------|--------------|------------------|------------------|-----------|
| Cancer         | 31 | Dead   | 2 (6.5)      | 7 (22.6)         | 21 (67.7)        | 30 (96.8) |
|                |    | Alive  | 1 (3.2)      | 0 (0)            | 0 (0)            | 1 (3.2)   |
| Organ Failure  | 79 | Dead   | 2 (2.5)      | 16 (20.2)        | 54 (68.4)        | 72 (91.1) |
|                |    | Alive  | 2 (2.5)      | 4 (5.1)          | 1 (1.3)          | 7 (8.9)   |
| Dementia       | 86 | Dead   | 1 (1.2)      | 6 (6.9)          | 55 (64.0)        | 62 (72.1) |
|                |    | Alive  | 0 (0)        | 19 (22.1)        | 5 (5.8)          | 24 (27.9) |
| Multimorbidity | 64 | Dead   | 0 (0)        | 8 (12.5)         | 48 (75.0)        | 56 (87.5) |
|                |    | Alive  | 0 (0)        | 8 (12.5)         | 0 (0)            | 8 (12.5)  |

### Prognosis Value of the Frail-VIG Index

The prognostic value of the Frail-VIG index for the end-of-life people (expressed as the AUC of the ROC analysis) was 0.87 (95% CI:0.83-0.92) after one year and 0.87 (95%



1  
2  
3 CI:0.84-0.92) after two years of follow-up. Of the 184 end-of-life people with advanced  
4 frailty (Frail-VIG index score > 0.5), 178 (96.7%) had died at two years of follow-up.  
5  
6 The AUC differed among each of the faour end-of-life trajectories: cancer (1 and 0.93),  
7 organ failure (0.86 and 0.90), dementia (0.92 and 0.92) and multimorbidity (0.91 and  
8 0.94), after one and two years of follow-up, respectively. Regarding the sensitivity and  
9 specificity of the Frail-VIG index as prognosis factor of mortality, the most sensitive and  
10 specific cut-off was 0.5 at both one and two years after follow-up, showing a sensitivity  
11 of 0.81 and 0.85 and a specificity of 0.83 and 0.81, respectively.  
12  
13  
14  
15  
16  
17  
18  
19  
20  
21

## 22 **DISCUSSION**

23  
24  
25  
26 In this prospective, observational study including 590 patients admitted at an Acute  
27 Geriatric unit (AGU), we found that all older patients were frail towards the end of life  
28 (the prevalence of moderate-to-advanced frailty was 97% among people within an end-  
29 of-life trajectory and 55% outside it). Furthermore, advanced frailty was the predominant  
30 frailty category (ranged 68 to 75%) for all end-of-life trajectories: cancer, organ failure,  
31 dementia, and multimorbidity. Overall, the Frail-VIG index had a high capacity to predict  
32 death at one and two years (AUC 0.87), albeit to a different extent for the end-of-life  
33 categories cancer, organ failure, dementia and multimorbidity (AUC was always >0.86  
34 for mortality at either one or two years). This finding confirms the hypothesis that the  
35 degree of frailty is related to prognosis regardless of the illness trajectory.  
36  
37  
38  
39  
40  
41  
42  
43  
44  
45  
46  
47  
48  
49

50 The characteristics and outcomes of the cohort assessed in this study, which included all  
51 patients admitted to an Acute Geriatric unit (AGU), were similar to those previously  
52 reported. All the persons assessed in this study had a Frail-VIG index score <0.8, similar  
53 to previous studies showing that the theoretical maximum score is 0.7. According to these  
54 studies, the accumulation of 2/3 of all possible deficits (Frailty index score >0.7) results  
55  
56  
57  
58  
59  
60

1  
2  
3 in death due to the person's inability to overcome more deficits, a phenomenon defined  
4 as system failure.[25,26] Likewise, similar to previous studies in other populations, the  
5 mortality rate in our cohort was nearly 100% for the end of life people with frailty index  
6 score >0.5.[26,27]  
7  
8  
9  
10

11  
12  
13 Furthermore, we provide evidence showing that frailty, measured using the Frail-VIG  
14 index, significantly influenced survival irrespective of the advanced illness and end-of-  
15 life trajectory. In spite of this general influence, the survival curves according to the frailty  
16 degree followed different patterns for the four end-of-life trajectories, enabling the  
17 description of different frailty or deficit accumulation end-of-life trajectories according  
18 to the main disease. Thus, in end-of-life people with cancer, mortality rates were high  
19 regardless of the frailty degree (moderate or advanced), leading to the hypothesis, similar  
20 to recent studies, that cancer patients have a catastrophic accumulation of deficits.[28] In  
21 contrast, end-of-life people with dementia showed different mortality rates according to  
22 their frailty degree and died progressively, likely due to the natural history of the disease,  
23 suggesting a slower accumulation of deficits. People with multimorbidity and advanced  
24 frailty shows a survival profile similar to people with cancer, while those with moderate  
25 frailty have a survival rate more similar to people with dementia. Finally, persons with an  
26 organ disease would accumulate deficits in episodes, even though prospective studies  
27 with serial frailty indexes would be required to test this hypothesis.  
28  
29  
30  
31  
32  
33  
34  
35  
36  
37  
38  
39  
40  
41  
42  
43  
44  
45  
46  
47  
48

49 In this regard, similar to recent studies describing different trajectories according to the  
50 evolution of the social, spiritual or psychological situation of end-of-life people,[3]  
51 prospective studies following the degree of frailty using electronic frailty indexes have  
52 described three different trajectories (i.e., rapidly rising frailty, moderately increasing  
53 frailty, and stable frailty).[28] Even though more studies would be required to describe  
54  
55  
56  
57  
58  
59  
60

1  
2  
3 different end-of-life frailty trajectories, the fact that each end-of-life trajectory resulted in  
4  
5 different mortality curves supports a dynamic view of end-of-life people.  
6  
7

8  
9 The traditional association of frailty to the “third end-of-life trajectory” (i.e., dementia)  
10  
11 [13,14] has probably been influenced by the lack of specific prognostic instruments for  
12  
13 persons in this trajectory, unlike those in the cancer [29,30] or organ disease [31,32]  
14  
15 trajectories. Our results regarding the high prevalence of frailty in all end-of-life  
16  
17 trajectories support the validity of the concept that frailty may be present in all trajectories  
18  
19 beyond the dementia trajectory. In addition to expanding the concept of frailty, our study  
20  
21 underscores the need to consider a further development of the end-of-life trajectories. Of  
22  
23 the 260 people who were identified as people in end-of-life situation, 24.6% did not have  
24  
25 severity criteria for a single disease, although all of them had at least 2 chronic conditions.  
26  
27 The identification of this cluster of people with advanced frailty and multimorbidity can  
28  
29 help provide them early palliative care, and the benefits derived from it.[33,34]  
30  
31  
32  
33

34  
35 Moreover, the fact that the concept of frailty is valid for all end-of-life trajectories grants  
36  
37 practical uses of quantitative frailty assessment in the management and identification of  
38  
39 end-of-life people.[8] First, assessment and quantification of frailty using a frailty index,  
40  
41 which is suitable to synthesize the results of a multidimensional evaluation, can be useful  
42  
43 to validate the identification of people in an end-of-life situation;[12] secondly, due to its  
44  
45 ability to discriminate between different degrees of severity, frailty indexes can be very  
46  
47 useful to healthcare professionals for the situational diagnosis of the first and second end-  
48  
49 of-life transition,[6,12] and monitorization of end-of-life people evolution;[35,36] and  
50  
51 finally, quantification of frailty would enable palliative care customization [37,38] and  
52  
53 engage people, caregivers and healthcare professionals in sharing decision-making and  
54  
55 advance care planning.  
56  
57  
58  
59  
60

1  
2  
3 The results of this study should be interpreted in the context of some limitations,  
4 particularly regarding the generalizability of the results. Firstly, the recruitment strategy  
5 based on an AGU solely was likely to enrich our study sample with older patients and  
6 consequently, the results of this study may be only applicable to older patients. Secondly,  
7 although the study site was a reference hospital covering an area of 156,000 inhabitants,  
8 the sociodemographic characteristics of our sample might not match those of the overall  
9 population. Finally, the analysis of end-of-life people frailty across the various end-of-  
10 life trajectory categories importantly reduced the number of patients in each group, thus  
11 limiting the statistical power of these analyses. However, despite the reduced number of  
12 patients in some groups, our analysis yielded statistically significant results. In spite of  
13 its limitations, to our knowledge, this study is the first to evaluate the degree of frailty  
14 using a frailty index in patients identified as end-of-life people. Frailty was evaluated in  
15 a cohort of geriatric patients, including end-of-life and non-end-of-life people, and the  
16 data for this study was collected during routine geriatric assessment, as opposed to  
17 previous studies that used electronic health record data to evaluate the degree of  
18 frailty.[39] Moreover, the single computer information system of Catalonia (HC3) that  
19 collects the medical records and mortality status of all patients reported by all health  
20 providers prevented loss of patients up to follow-up.[24] Consequently, the lack of  
21 missing data due to the HC3 system, along with the use of standard and validated tools to  
22 identify end-of-life people (NECPAL) and to measure frailty (Frail-VIG index) increased  
23 the accuracy of the results obtained from this study. The early identification of people  
24 needing palliative care and the more accurate definition of the various end-of-life  
25 trajectories opened the door to a novel perspective of palliative care.[40] In this regard,  
26 the use of frailty as an overarching concept in the assessment of all people in an end-of-  
27  
28  
29  
30  
31  
32  
33  
34  
35  
36  
37  
38  
39  
40  
41  
42  
43  
44  
45  
46  
47  
48  
49  
50  
51  
52  
53  
54  
55  
56  
57  
58  
59  
60

1  
2  
3 life situation —at least of those with a multimorbid profile— might contribute to go one  
4  
5 step further in this novel approach to palliative care.  
6  
7

## 8 9 **CONCLUSIONS**

10  
11  
12 Our results showed that all end-of-life people were frail (mostly with advanced frailty)  
13  
14 irrespective of the end-of-life trajectory. Their degree of frailty, measured using the Frail-  
15  
16 VIG index, influenced mortality. This indicates a close relationship between frailty, end-  
17  
18 of-life status, and mortality for all people who die. Measuring frailty using a frailty index  
19  
20 could be useful in routine practice for healthcare professionals to understand the  
21  
22 heterogeneous nature of people needing palliative care and tailor their care to the patient's  
23  
24 needs. The survival pattern of people with multimorbidity could support the description  
25  
26 of a composite illness trajectory for this patient group.  
27  
28  
29  
30  
31

## 32 33 **DECLARATIONS**

### 34 35 36 **Ethics Approval and Consent to Participate**

37  
38  
39 All patients and family relatives of patients with advanced dementia situation ( $GDS \geq 6$ )  
40  
41 signed the written informed consent for participation before any data was recorded. The  
42  
43 study protocol was approved by the Ethics Committee of the University Hospital of Vic  
44  
45 (2,014,850 PR80). This study was conducted in accordance with the Helsinki Declaration  
46  
47 and the local Personal Data Protection Law (LOPD 15/1999).  
48  
49  
50  
51  
52

### 53 54 **Consent for publication**

55  
56  
57 Not applicable.  
58  
59  
60

## Data Sharing

The anonymized datasets analyzed during the current study are available from the corresponding author on reasonable request.

## Competing interests

The authors declare no conflict of interest.

## Funding

This study was funded by the Instituto de Salud Carlos III (ISCIII) 17/02240 grant

## Author's contributions

JAN, AT, JCM, and XGB were responsible for the conception and design of the study. JAN coordinated and substantially contributed to the data collection. JCM and RO performed the statistical analysis. All authors (JAN, SAM, AT, JCM, SM, RO, NL, JE, SS and XGB) were involved in interpretation of data. JAN wrote the initial draft of the manuscript and all the other authors (SAM, AT, JCM, SM, RO, NL, JE, SS and XGB) critically revised the manuscript. All authors (JAN, SAM, AT, JCM, SM, RO, NL, JE, SS and XGB) have provided approval for the final version of the manuscript submitted for publication and agree to be accountable for all aspects of the work.

## Acknowledgements

The authors would like to acknowledge i2e3 Biomedical Research Institute for providing medical writing assistance.

## REFERENCES

- 1 Boyd K, Murray SSA. Recognising and managing key transitions in end of life care. *BMJ* 2010;**341**:c4863.
- 2 Gomez-Batiste X, Martinez-Munoz M, Blay C, *et al*. Identifying patients with chronic conditions in need of palliative care in the general population: development of the NECPAL tool and preliminary prevalence rates in Catalonia. *BMJ Support Palliat Care* 2013;**3**:300–8.
- 3 Murray SA, Kendall M, Mitchell G, *et al*. Palliative care from diagnosis to death. *BMJ* 2017;**356**:j878.
- 4 Kimbell B, Murray SA, Macpherson S BK. Embracing inherent uncertainty in advanced illness. *BMJ Br Med J* 2016;**354**:i3802.
- 5 Gómez-Batiste X, Blay C, Broggi MA, *et al*. Ethical Challenges of Early Identification of Advanced Chronic Patients in Need of Palliative Care. *J Palliat Care* 2018;**33**:247–51.
- 6 Amblàs-Novellas J, Espauella J, Rexach L *et al*, *et al*. Frailty, severity, progression and shared decision-making: A pragmatic framework for the challenge of clinical complexity at the end of life. *Eur Geriatr Med* 2015;**6**:189–194.
- 7 Cardona-Morrell M, Lewis E, Suman S, *et al*. Recognising older frail patients near the end of life: What next? *Eur J Intern Med* 2017;**45**:84–90.
- 8 Koller K, Rockwood K. Frailty in older adults: Implications for end-of-life care. *Cleve Clin J Med* 2013;**80**:168–74.

- 1  
2  
3 9 Stow D, Spiers G, Matthews FE, *et al.* What is the evidence that people with frailty  
4 have needs for palliative care at the end of life? A systematic review and narrative  
5 synthesis. *Palliat Med* 2019;**33**:399–414.  
6  
7  
8  
9  
10  
11 10 Mousa A, Savva GM, Mitnitski A, *et al.* Is frailty a stable predictor of mortality  
12 across time? Evidence from the Cognitive Function and Ageing Studies. *Age*  
13 *Ageing* 2018;**47**:721–7.  
14  
15  
16  
17  
18  
19 11 Pialoux T, Goyard J, Hermet R. When frailty should mean palliative care. *J Nurs*  
20 *Educ Pract* 2013;**3**:75–84.  
21  
22  
23  
24 12 Pollack LR, Goldstein NE, Gonzalez WC, *et al.* The Frailty Phenotype and  
25 Palliative Care Needs In Older Survivors of Critical Illness Lauren. *J Am Geriatr*  
26 *Soc* 2018;**65**:1168–75.  
27  
28  
29  
30  
31  
32 13 Lunney JR, Lynn J, Foley DJ, *et al.* Patterns of functional decline at the end of life.  
33 *JAMA* 2003;**289**:2387–92.  
34  
35  
36  
37  
38 14 Murray S a, Boyd K, Sheikh A. Palliative care in chronic illness. *BMJ*  
39 2005;**330**:611–2.  
40  
41  
42  
43 15 Rodríguez-Mañas L, Féart C, Mann G, *et al.* Searching for an operational  
44 definition of frailty: A delphi method based consensus statement. the frailty  
45 operative definition-consensus conference project. *Journals Gerontol - Ser A Biol*  
46 *Sci Med Sci* 2013;**68**:62–7.  
47  
48  
49  
50  
51  
52  
53 16 Cesari M, Gambassi G, van Kan GA, *et al.* The frailty phenotype and the frailty  
54 index: different instruments for different purposes. *Age Ageing* 2014;**43**:10–2.  
55  
56  
57  
58  
59 17 Bone AE, Morgan M, Maddocks M, *et al.* Developing a model of short-term  
60



- 1  
2  
3 integrated palliative and supportive care for frail older people in community  
4 settings: perspectives of older people, carers and other key stakeholders. *Age*  
5 *Ageing* 2016;**45**:863–73.  
6  
7  
8  
9  
10  
11 18 Cesari M, Prince M, Thiyagarajan JA, *et al.* Frailty: An Emerging Public Health  
12 Priority. *J Am Med Dir Assoc* 2016;**17**:188–92.  
13  
14  
15  
16 19 Moorhouse P, Rockwood K, Morley JE, *et al.* Frailty Consensus: A Call to Action.  
17 *J Am Med Dir Assoc* 2013;**14**:392–7.  
18  
19  
20  
21 20 Amblàs-Novellas J, Martori JC, Espauella J, *et al.* Frail-VIG index: a concise  
22 frailty evaluation tool for rapid geriatric assessment. *BMC Geriatr* 2018;**18**:29.  
23  
24  
25  
26  
27 21 von Elm E, Altman DG, Egger M, *et al.* The Strengthening the Reporting of  
28 Observational Studies in Epidemiology (STROBE) statement: guidelines for  
29 reporting observational studies. *Lancet* 2007;**370**:1453–7.  
30  
31  
32  
33  
34  
35 22 Gómez-Batiste X, Martínez-Muñoz M, Blay C, *et al.* Prevalence and  
36 characteristics of patients with advanced chronic conditions in need of palliative  
37 care in the general population: A cross-sectional study. *Palliat Med* 2014;**28**:302–  
38 11.  
39  
40  
41  
42  
43  
44  
45  
46 23 Gómez-Batiste X, Turrillas P, Tebé C, *et al.* NECPAL tool prognostication in  
47 advanced chronic illness: A rapid review and expert consensus. *BMJ Support*  
48 *Palliat Care* Published Online First: 2020. doi:10.1136/bmjspcare-2019-002126  
49  
50  
51  
52  
53 24 Solans O, Gallego C, Garcia-Cuyas F, *et al.* Shared Medical Record, Personal  
54 Health Folder and Health and Social Integrated Care in Catalonia. In: *New*  
55 *Perspectives in Medical Records*. Springer, Cham 2017. 49–64.  
56  
57  
58  
59  
60

- 1  
2  
3 25 Rockwood K, Mitnitski A. Frailty Defined by Deficit Accumulation and Geriatric  
4  
5 Medicine Defined by Frailty. *Clin. Geriatr. Med.* 2011;**27**:17–26.  
6  
7  
8  
9 26 Rockwood K, Mitnitski A. Limits to deficit accumulation in elderly people. *Mech*  
10  
11 *Age Dev* 2006;**127**:494–6.  
12  
13  
14 27 Rockwood K, Rockwood MRH, Mitnitski A. Physiological redundancy in older  
15  
16 adults in relation to the change with age in the slope of a frailty index. *J Am Geriatr*  
17  
18 *Soc* 2010;**58**:318–23.  
19  
20  
21  
22 28 Stow D, Matthews FE, Hanratty B. Frailty trajectories to identify end of life: A  
23  
24 longitudinal population-based study. *BMC Med* 2018;**16**:1–7.  
25  
26  
27  
28 29 Evans C, McCarthy M. Prognostic uncertainty in terminal care: can the Karnofsky  
29  
30 index help? *Lancet (London, England)* 1985;**1**:1204–6.  
31  
32  
33 30 Anderson F, Downing GM, Hill J, *et al.* Palliative Performance Scale (PPS): A  
34  
35 new tool. *J Palliat Care* 1996;**12**:5–11.  
36  
37  
38  
39 31 van Dijk WD, van den Bemt L, van den Haak-Rongen S, *et al.* Multidimensional  
40  
41 prognostic indices for use in COPD patient care. A systematic review. *Respir. Res.*  
42  
43 2011;**12**:151.  
44  
45  
46  
47 32 Walter LC, Brand RJ, Counsell SR, *et al.* Development and validation of a  
48  
49 prognostic index for 1-year mortality in older adults after hospitalization. *JAMA*  
50  
51 2001;**285**:2987–94.  
52  
53  
54  
55 33 Moine S, Murray SA, Boyd K, *et al.* Palliative care and the endless cycle of serious  
56  
57 health-related suffering. *Lancet.* 2018;**392**:471–2.  
58  
59  
60

- 1  
2  
3 34 Aldridge MD, Bradley EH. Epidemiology and patterns of care at the end of life:  
4  
5 Rising complexity, shifts in care patterns and sites of death. *Health Aff*  
6  
7 2017;**36**:1175–83.  
8  
9  
10  
11 35 Gill TM, Gahbauer E a, Allore HG, *et al*. Transitions between frailty states among  
12  
13 community-living older persons. *Arch Intern Med* 2006;**166**:418–23.  
14  
15  
16 36 Liu ZY, Wei YZ, Wei LQ, *et al*. Frailty transitions and types of death in Chinese  
17  
18 older adults: A population-based cohort study. *Clin Interv Aging* 2018;**13**:947–56.  
19  
20  
21  
22 37 The Picker Institute. *Patient - Centered Care 2015 : Scenarios , Vision , Goals &*  
23  
24 *Next Steps*. 2004.  
25  
26  
27  
28 38 Cohen-Mansfield J, Skornick-Bouchbinder M, Brill S. Trajectories of End of Life:  
29  
30 A Systematic Review. *Journals Gerontol - Ser B Psychol Sci Soc Sci* 2018;**73**:564–  
31  
32 72.  
33  
34  
35  
36 39 Clegg A, Bates C, Young J, *et al*. Development and validation of an electronic  
37  
38 frailty index using routine primary care electronic health record data. *Age Ageing*  
39  
40 2016;**45**:353–60.  
41  
42  
43  
44 40 Amblàs-Novellas J, Murray SA, Espauella J, *et al*. Identifying patients with  
45  
46 advanced chronic conditions for a progressive palliative care approach: a cross-  
47  
48 sectional study of prognostic indicators related to end-of-life trajectories. *BMJ*  
49  
50 *Open* 2016;**6**:e012340.  
51  
52  
53  
54  
55  
56  
57  
58  
59  
60

## FIGURE LEGENDS

**Figure 1.** Survival according to the degree of frailty in (A) the total study patients, (B) end-of-life people, and (C) Non End-of-life people.

**Figure 2.** Survival according to the degree of frailty and end-of-life trajectory: (A) cancer, (B) organ failure, (C) dementia, and (D) Multimorbidity.

For peer review only

(A)

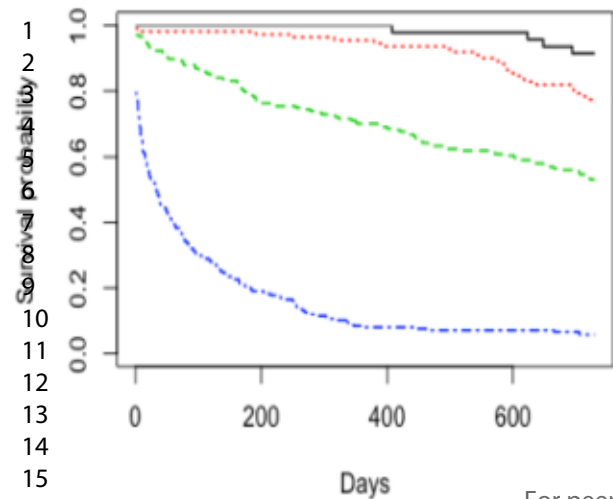

BMJ Open (B)

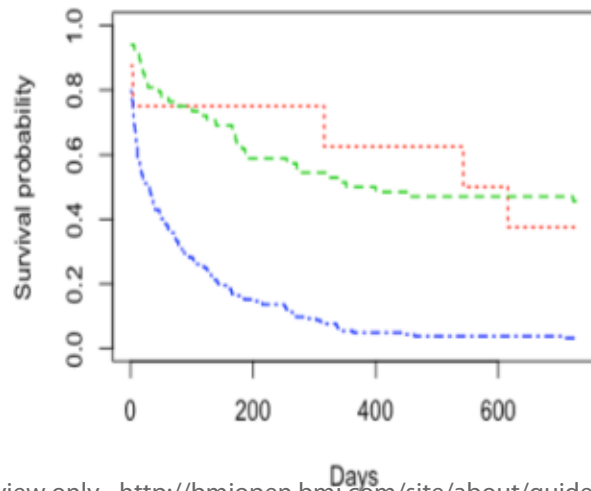

(C)

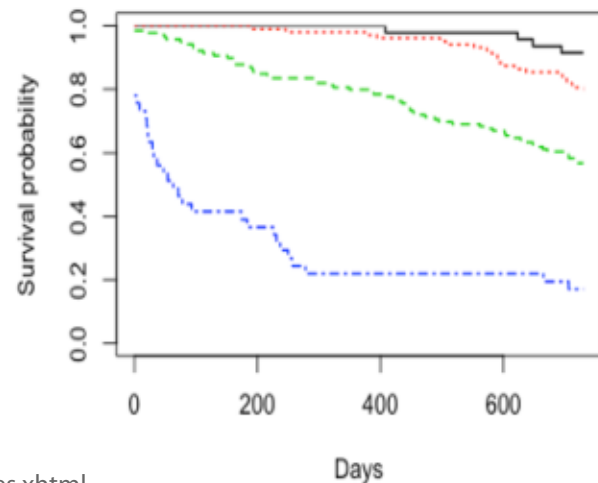For peer review only - <http://bmjopen.bmj.com/site/about/guidelines.xhtml>

--- Advanced Frailty

--- Moderate Frailty

... Mild Frailty

— No frail

(A)

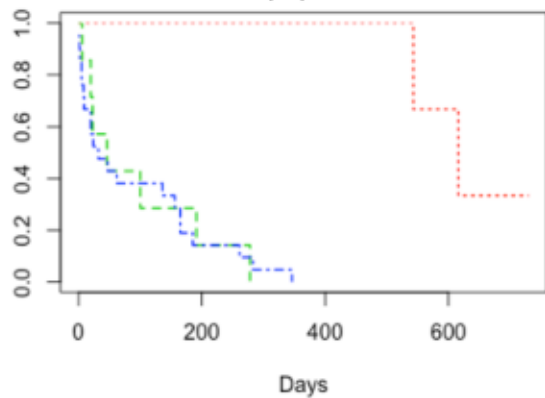

(C)

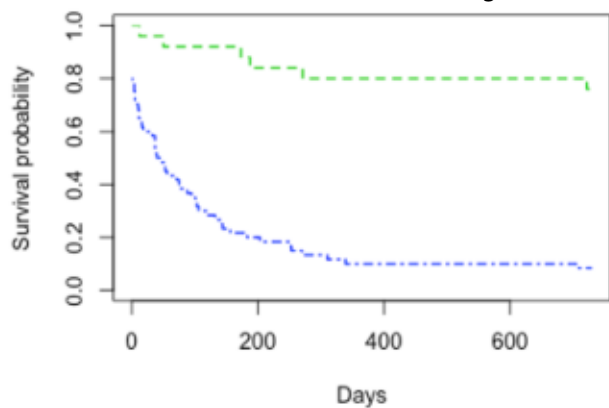

(B)

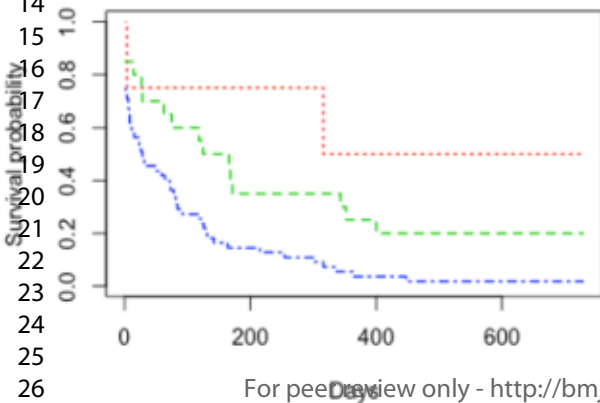

(D)

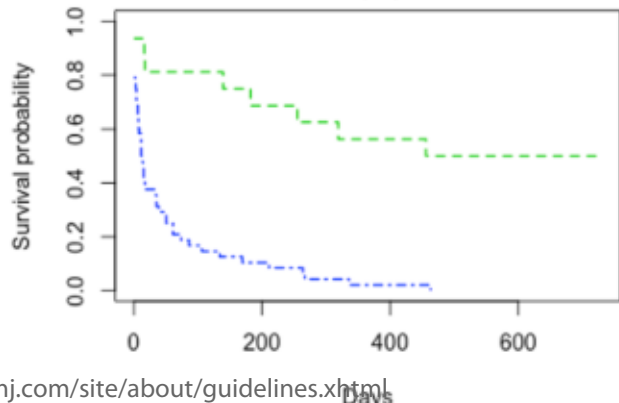

For peer review only - <http://bmjopen.bmj.com/site/about/guidelines.xhtml>

— Advanced Frailty      - - - Moderate Frailty      . . . Mild Frailty

STROBE Statement—Checklist of items that should be included in reports of *cohort studies*

|                              | Item No | Recommendation                                                                                                                                                                                                                                                                                                         | Page No                     |
|------------------------------|---------|------------------------------------------------------------------------------------------------------------------------------------------------------------------------------------------------------------------------------------------------------------------------------------------------------------------------|-----------------------------|
| <b>Title and abstract</b>    | 1       | (a) Indicate the study's design with a commonly used term in the title or the abstract<br>(b) Provide in the abstract an informative and balanced summary of what was done and what was found                                                                                                                          | 1, 3<br>3, 4                |
| <b>Introduction</b>          |         |                                                                                                                                                                                                                                                                                                                        |                             |
| Background/rationale         | 2       | Explain the scientific background and rationale for the investigation being reported                                                                                                                                                                                                                                   | 5-6                         |
| Objectives                   | 3       | State specific objectives, including any prespecified hypotheses                                                                                                                                                                                                                                                       | 6                           |
| <b>Methods</b>               |         |                                                                                                                                                                                                                                                                                                                        |                             |
| Study design                 | 4       | Present key elements of study design early in the paper                                                                                                                                                                                                                                                                | 6                           |
| Setting                      | 5       | Describe the setting, locations, and relevant dates, including periods of recruitment, exposure, follow-up, and data collection                                                                                                                                                                                        | 6                           |
| Participants                 | 6       | (a) Give the eligibility criteria, and the sources and methods of selection of participants. Describe methods of follow-up<br>(b) For matched studies, give matching criteria and number of exposed and unexposed                                                                                                      | 6, 8<br>N/A                 |
| Variables                    | 7       | Clearly define all outcomes, exposures, predictors, potential confounders, and effect modifiers. Give diagnostic criteria, if applicable                                                                                                                                                                               | 7                           |
| Data sources/<br>measurement | 8*      | For each variable of interest, give sources of data and details of methods of assessment (measurement). Describe comparability of assessment methods if there is more than one group                                                                                                                                   | 7                           |
| Bias                         | 9       | Describe any efforts to address potential sources of bias                                                                                                                                                                                                                                                              | N/A                         |
| Study size                   | 10      | Explain how the study size was arrived at                                                                                                                                                                                                                                                                              | 6                           |
| Quantitative variables       | 11      | Explain how quantitative variables were handled in the analyses. If applicable, describe which groupings were chosen and why                                                                                                                                                                                           | 8                           |
| Statistical methods          | 12      | (a) Describe all statistical methods, including those used to control for confounding<br>(b) Describe any methods used to examine subgroups and interactions<br>(c) Explain how missing data were addressed<br>(d) If applicable, explain how loss to follow-up was addressed<br>(e) Describe any sensitivity analyses | 8<br>8<br>N/A<br>N/A<br>N/A |
| <b>Results</b>               |         |                                                                                                                                                                                                                                                                                                                        |                             |
| Participants                 | 13*     | (a) Report numbers of individuals at each stage of study—eg numbers potentially eligible, examined for eligibility, confirmed eligible, included in the study, completing follow-up, and analysed<br>(b) Give reasons for non-participation at each stage<br>(c) Consider use of a flow diagram                        | 9<br>N/A<br>N/A             |
| Descriptive data             | 14*     | (a) Give characteristics of study participants (eg demographic, clinical, social) and information on exposures and potential confounders<br>(b) Indicate number of participants with missing data for each variable of interest<br>(c) Summarise follow-up time (eg, average and total amount)                         | 9<br>N/A<br>11              |
| Outcome data                 | 15*     | Report numbers of outcome events or summary measures over time                                                                                                                                                                                                                                                         | 9, 11                       |

|    |                          |    |                                                                                                                                                                                                              |       |
|----|--------------------------|----|--------------------------------------------------------------------------------------------------------------------------------------------------------------------------------------------------------------|-------|
| 1  | Main results             | 16 | (a) Give unadjusted estimates and, if applicable, confounder-adjusted estimates and their precision (eg, 95% confidence interval). Make clear which confounders were adjusted for and why they were included | 9-13  |
| 2  |                          |    | (b) Report category boundaries when continuous variables were categorized                                                                                                                                    | 7     |
| 3  |                          |    | (c) If relevant, consider translating estimates of relative risk into absolute risk for a meaningful time period                                                                                             | N/A   |
| 4  |                          |    |                                                                                                                                                                                                              |       |
| 5  | Other analyses           | 17 | Report other analyses done—eg analyses of subgroups and interactions, and sensitivity analyses                                                                                                               | N/A   |
| 6  |                          |    |                                                                                                                                                                                                              |       |
| 7  |                          |    |                                                                                                                                                                                                              |       |
| 8  |                          |    |                                                                                                                                                                                                              |       |
| 9  |                          |    |                                                                                                                                                                                                              |       |
| 10 |                          |    |                                                                                                                                                                                                              |       |
| 11 | <b>Discussion</b>        |    |                                                                                                                                                                                                              |       |
| 12 | Key results              | 18 | Summarise key results with reference to study objectives                                                                                                                                                     | 13    |
| 13 | Limitations              | 19 | Discuss limitations of the study, taking into account sources of potential bias or imprecision. Discuss both direction and magnitude of any potential bias                                                   | 15-16 |
| 14 | Interpretation           | 20 | Give a cautious overall interpretation of results considering objectives, limitations, multiplicity of analyses, results from similar studies, and other relevant evidence                                   | 13-16 |
| 15 | Generalisability         | 21 | Discuss the generalisability (external validity) of the study results                                                                                                                                        | 15-16 |
| 16 |                          |    |                                                                                                                                                                                                              |       |
| 17 |                          |    |                                                                                                                                                                                                              |       |
| 18 |                          |    |                                                                                                                                                                                                              |       |
| 19 |                          |    |                                                                                                                                                                                                              |       |
| 20 |                          |    |                                                                                                                                                                                                              |       |
| 21 | <b>Other information</b> |    |                                                                                                                                                                                                              |       |
| 22 | Funding                  | 22 | Give the source of funding and the role of the funders for the present study and, if applicable, for the original study on which the present article is based                                                | 18    |
| 23 |                          |    |                                                                                                                                                                                                              |       |
| 24 |                          |    |                                                                                                                                                                                                              |       |
| 25 |                          |    |                                                                                                                                                                                                              |       |

\*Give information separately for exposed and unexposed groups.

**Note:** An Explanation and Elaboration article discusses each checklist item and gives methodological background and published examples of transparent reporting. The STROBE checklist is best used in conjunction with this article (freely available on the Web sites of PLoS Medicine at <http://www.plosmedicine.org/>, Annals of Internal Medicine at <http://www.annals.org/>, and Epidemiology at <http://www.epidem.com/>). Information on the STROBE Initiative is available at <http://www.strobe-statement.org>.



# BMJ Open

## Frailty degree and illness trajectories in older people towards the end-of-life: a prospective observational study

|                                 |                                                                                                                                                                                                                                                                                                                                                                                                                                                                                                                                                                                                                                                                                                                                                                                                                                                                                                                                                                                                                                                                                                                                                                                                                                                                                                                                                                                                                                                                                                                                                                                                                                                                                                                                                                                                                                                                          |
|---------------------------------|--------------------------------------------------------------------------------------------------------------------------------------------------------------------------------------------------------------------------------------------------------------------------------------------------------------------------------------------------------------------------------------------------------------------------------------------------------------------------------------------------------------------------------------------------------------------------------------------------------------------------------------------------------------------------------------------------------------------------------------------------------------------------------------------------------------------------------------------------------------------------------------------------------------------------------------------------------------------------------------------------------------------------------------------------------------------------------------------------------------------------------------------------------------------------------------------------------------------------------------------------------------------------------------------------------------------------------------------------------------------------------------------------------------------------------------------------------------------------------------------------------------------------------------------------------------------------------------------------------------------------------------------------------------------------------------------------------------------------------------------------------------------------------------------------------------------------------------------------------------------------|
| Journal:                        | <i>BMJ Open</i>                                                                                                                                                                                                                                                                                                                                                                                                                                                                                                                                                                                                                                                                                                                                                                                                                                                                                                                                                                                                                                                                                                                                                                                                                                                                                                                                                                                                                                                                                                                                                                                                                                                                                                                                                                                                                                                          |
| Manuscript ID                   | bmjopen-2020-042645.R1                                                                                                                                                                                                                                                                                                                                                                                                                                                                                                                                                                                                                                                                                                                                                                                                                                                                                                                                                                                                                                                                                                                                                                                                                                                                                                                                                                                                                                                                                                                                                                                                                                                                                                                                                                                                                                                   |
| Article Type:                   | Original research                                                                                                                                                                                                                                                                                                                                                                                                                                                                                                                                                                                                                                                                                                                                                                                                                                                                                                                                                                                                                                                                                                                                                                                                                                                                                                                                                                                                                                                                                                                                                                                                                                                                                                                                                                                                                                                        |
| Date Submitted by the Author:   | 17-Dec-2020                                                                                                                                                                                                                                                                                                                                                                                                                                                                                                                                                                                                                                                                                                                                                                                                                                                                                                                                                                                                                                                                                                                                                                                                                                                                                                                                                                                                                                                                                                                                                                                                                                                                                                                                                                                                                                                              |
| Complete List of Authors:       | <p>Amblàs-Novellas, Jordi; Hospital General de Vic, ; Universitat de Vic - Universitat Central de Catalunya,</p> <p>Murray, Scott; The University of Edinburgh, Primary Palliative Care Research Group, The Usher Institute of Population Health Sciences and Informatics</p> <p>Torné, Anna; Universitat de Vic - Universitat Central de Catalunya, Central Catalonia Chronicity Research Group (C3RG), Centre for Health and Social Care Research (CESS); Hospital General de Vic, Geriatric and Palliative Care Department</p> <p>Martori, Joan Carles; Universitat de Vic - Universitat Central de Catalunya, Data Analysis and Modeling Research Group</p> <p>Moine, Sébastien ; The University of Edinburgh, Primary Palliative Care Research Group, The Usher Institute of Population Health Sciences and Informatics</p> <p>Oller, Ramon; Universitat de Vic - Universitat Central de Catalunya, Data Analysis and Modelling Research Group. Department of Economics and Business</p> <p>Latorre, Nadina; Universitat de Vic - Universitat Central de Catalunya, Central Catalonia Chronicity Research Group (C3RG), Centre for Health and Social Care Research (CESS); Hospital General de Vic, Geriatric and Palliative Care Department</p> <p>Espauella, Joan; Universitat de Vic - Universitat Central de Catalunya, Central Catalonia Chronicity Research Group (C3RG), Centre for Health and Social Care Research (CESS); Hospital Universitari de Vic, Geriatric and Palliative Care Department</p> <p>Santaeugènia, Sebastià; Badalona Serveis Assistencials SA, Department of Geriatric Medicine and Palliative Care; Universitat de Vic - Universitat Central de Catalunya, Chronicity Research Group (C3RG), Centre for Health and Social Care Research (CESS)</p> <p>Gómez-Batiste, Xavier; University of Vic - Central University of Catalonia,</p> |
| <b>Primary Subject Heading</b>: | Palliative care                                                                                                                                                                                                                                                                                                                                                                                                                                                                                                                                                                                                                                                                                                                                                                                                                                                                                                                                                                                                                                                                                                                                                                                                                                                                                                                                                                                                                                                                                                                                                                                                                                                                                                                                                                                                                                                          |
| Secondary Subject Heading:      | Geriatric medicine, Palliative care                                                                                                                                                                                                                                                                                                                                                                                                                                                                                                                                                                                                                                                                                                                                                                                                                                                                                                                                                                                                                                                                                                                                                                                                                                                                                                                                                                                                                                                                                                                                                                                                                                                                                                                                                                                                                                      |
| Keywords:                       | GERIATRIC MEDICINE, Adult palliative care < PALLIATIVE CARE, Quality in health care < HEALTH SERVICES ADMINISTRATION & MANAGEMENT                                                                                                                                                                                                                                                                                                                                                                                                                                                                                                                                                                                                                                                                                                                                                                                                                                                                                                                                                                                                                                                                                                                                                                                                                                                                                                                                                                                                                                                                                                                                                                                                                                                                                                                                        |
|                                 |                                                                                                                                                                                                                                                                                                                                                                                                                                                                                                                                                                                                                                                                                                                                                                                                                                                                                                                                                                                                                                                                                                                                                                                                                                                                                                                                                                                                                                                                                                                                                                                                                                                                                                                                                                                                                                                                          |

1  
2  
3  
4  
5  
6  
7  
8  
9  
10  
11  
12  
13  
14  
15  
16  
17  
18  
19  
20  
21  
22  
23  
24  
25  
26  
27  
28  
29  
30  
31  
32  
33  
34  
35  
36  
37  
38  
39  
40  
41  
42  
43  
44  
45  
46  
47  
48  
49  
50  
51  
52  
53  
54  
55  
56  
57  
58  
59  
60

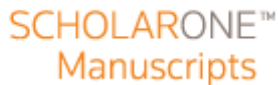

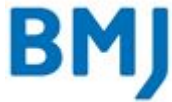

I, the Submitting Author has the right to grant and does grant on behalf of all authors of the Work (as defined in the below author licence), an exclusive licence and/or a non-exclusive licence for contributions from authors who are: i) UK Crown employees; ii) where BMJ has agreed a CC-BY licence shall apply, and/or iii) in accordance with the terms applicable for US Federal Government officers or employees acting as part of their official duties; on a worldwide, perpetual, irrevocable, royalty-free basis to BMJ Publishing Group Ltd ("BMJ") its licensees and where the relevant Journal is co-owned by BMJ to the co-owners of the Journal, to publish the Work in this journal and any other BMJ products and to exploit all rights, as set out in our [licence](#).

The Submitting Author accepts and understands that any supply made under these terms is made by BMJ to the Submitting Author unless you are acting as an employee on behalf of your employer or a postgraduate student of an affiliated institution which is paying any applicable article publishing charge ("APC") for Open Access articles. Where the Submitting Author wishes to make the Work available on an Open Access basis (and intends to pay the relevant APC), the terms of reuse of such Open Access shall be governed by a Creative Commons licence – details of these licences and which [Creative Commons](#) licence will apply to this Work are set out in our licence referred to above.

Other than as permitted in any relevant BMJ Author's Self Archiving Policies, I confirm this Work has not been accepted for publication elsewhere, is not being considered for publication elsewhere and does not duplicate material already published. I confirm all authors consent to publication of this Work and authorise the granting of this licence.

# Frailty Degree and Illness Trajectories in Older People towards the End-of-life: a Prospective Observational Study

## Authors

Jordi Amblàs-Novellas<sup>1,2,3,4</sup>, Scott A. Murray<sup>5</sup>, Anna Torné<sup>1,3</sup>, Joan Carles Martori<sup>6</sup>, Sébastien Moine<sup>5</sup>, Ramon Oller<sup>6</sup>, Nadina Latorre<sup>1,3</sup>, Joan Espauella<sup>1,2,3</sup>, Sebastià Santaegència<sup>1,4</sup>, Xavier Gómez-Batiste<sup>1,2</sup>

## Affiliations

1. Central Catalonia Chronicity Research Group (C3RG), Centre for Health and Social Care Research (CESS), University of Vic/Central University of Catalonia (UVIC-UCC). Vic, Barcelona, Spain.

2. Chair and Department of Palliative Care, University of Vic/Central University of Catalonia (UVIC-UCC). Vic, Barcelona, Spain

3. Geriatric and Palliative Care Department, Hospital Universitari de la Santa Creu and Hospital Universitari de Vic. Vic, Barcelona, Spain

4. Chronic Care Program, Ministry of Health, Generalitat de Catalunya, Catalonia, Spain

5. Primary Palliative Care Research Group, The Usher Institute of Population Health Sciences and Informatics, The University of Edinburgh, UK

6. Data Analysis and Modeling Research Group. Department of Economics and Business, University of Vic/Central University of Catalonia (UVIC-UCC). Vic, Barcelona, Spain

1  
2  
3  
4  
5  
6 **Corresponding autor:** Jordi Amblàs-Novellas. Central Catalonia Chronicity Research  
7  
8 Group (C3RG), Centre for Health and Social Care Research (CESS), Universitat de Vic.  
9  
10 University of Vic/Central University of Catalonia (UVIC-UCC). Rambla Hospital 52,  
11  
12 08500 Vic, Barcelona. Spain.  
13  
14

15  
16 Email: [jordiamblas@gmail.com](mailto:jordiamblas@gmail.com)  
17  
18  
19  
20  
21  
22  
23  
24  
25  
26  
27  
28  
29  
30  
31  
32  
33  
34  
35  
36  
37  
38  
39  
40  
41  
42  
43  
44  
45  
46  
47  
48  
49  
50  
51  
52  
53  
54  
55  
56  
57  
58  
59  
60

## Abstract

**Objectives:** To assess the degree of frailty in older people with different advanced diseases and its relationship with end-of-life illness trajectories and survival.

**Methods:** Prospective, observational study, including all patients admitted to the Acute Geriatric Unit of the University Hospital of Vic (Barcelona, Spain) during 12 consecutive months (2014 – 2015). The Frail-VIG index, based on 22 questions assessing 25 deficits, was used to quantify frailty degree, and participants with palliative care needs were identified using the NECPAL tool. Participants were classified according to their Frail-VIG index scores into 4 groups (i.e., no frailty, mild frailty, moderate frailty, and advanced frailty) and their dominant illness trajectory and followed for up to 2 years. The relationship between frailty degree and survival was evaluated using the C-statistics and the ROC curves. Survival curves were plotted using the Kaplan-Meier estimator and compared using the log-rank test. A Cox proportional hazards model with the interaction between frailty degree and illness trajectories was calculated.

**Results:** Of the 590 persons with a mean (SD) age of 86.4 (5.6) years recruited, 260 (44.1%) were identified as people with palliative care needs, distributed into cancer (n=31, 11.9%), organ failure (n=79, 30.4%), dementia (n=86, 33.1%), and multimorbidity (n=64, 24.6%) categories. All 260 people identified as end-of-life had some degree of frailty, mostly advanced frailty (n=184, 70.8%), regardless of the illness trajectory, and 220 (84.6%) died within two years. Cox regression analyses showed that the effect of frailty degree on survival, whereby increased frailty was associated with decreased survival, depended on the illness trajectories ( $p<0.01$  for all the coefficients).

1  
2  
3 **Conclusions:** All older people towards the end-of-life are frail, mostly with advanced  
4 frailty. The degree of frailty, the different illness trajectories, and survival show a tight  
5 correlation. Frailty indexes may be useful to assess end-of-life older people, regardless of  
6 their trajectory.  
7  
8  
9  
10  
11  
12

13 **Keywords:** Frailty, palliative care, mortality, multimorbidity, longitudinal study  
14  
15  
16  
17  
18  
19

## 20 **Strengths and Limitations of this Study**

21  
22  
23

- 24 • To our knowledge, this is the first study that evaluated the degree of frailty using a  
25 frailty index in older patients with different advanced illness trajectories.  
26  
27
- 28 • This is a real-life study, using tools routinely applied in the Acute Geriatric Unit  
29 conducting this study: the NECPAL, to identify people with palliative care needs,  
30 and the Frail-VIG index, to measure the degree of frailty and personalization of the  
31 interventions.  
32  
33
- 34 • In this context, assessing frailty degree may contribute to establish a common  
35 language between geriatric and palliative knowledge, with the goal of providing a  
36 better care for older people with palliative care needs, specially those in the first end-  
37 of-life transition.  
38  
39
- 40 • The use of a single computer system collecting the mortality status reported by all  
41 health providers prevented loss of patients and missing data, increasing the accuracy  
42 of the results.  
43  
44
- 45 • The results from this study were obtained in a very old population, potentially  
46 limiting their generalizability and raising the need for further studies in younger  
47 populations.  
48  
49  
50  
51  
52  
53  
54  
55  
56  
57  
58  
59  
60

## INTRODUCTION

The model of care for patients with advanced chronic conditions is currently shifting towards a new paradigm, characterized by early identification of persons with any disease or chronic condition who would benefit from palliative care [1,2]—this corresponds to the first transition in palliative care. Despite the benefits of this early identification,[3]the increasing number of people with palliative care needs, together with their high heterogeneity regarding age, needs, diseases, and chronic illnesses, poses novel challenges for early identification and assessment of these patients.[4,5] Indeed, the progression towards the end of life is conditioned by multiple variables and is strictly individual: not all people age in the same way nor reach the final situation with the same circumstances or needs.[6]

In the context of this new paradigm of “early palliative care”, some authors have pointed to frailty as a crucial concept for persons needing palliative care —particularly older people with multimorbidity—, their caregivers, and healthcare professionals, to learn to manage the uncertainty and complexity of these end-of-life situations.[7–9] Given the relationship between mortality and frailty,[10] the concept of frailty has been proposed as a criterion useful in the three key steps ensuring good palliative care,[5,6,11,12] including 1) early identification of persons in end-of-life situation (particularly in cases of advanced frailty); 2) multidimensional assessment and situational diagnosis; and 3) drafting an advanced care plan and sharing decision-making.

Regardless of the proposed uses of frailty as an indicator, palliative care and geriatrics have traditionally used this concept, albeit with different perspectives.[8] In the setting of palliative care, frailty has equated to the third end-of-life trajectory and defined as the gradual decline in physical function, typically associated with dementia.[13,14] In



1  
2  
3 contrast, from the geriatric perspective, frailty is rather a multidimensional clinical entity  
4 defined as a vulnerability state against stressing factors due to limited compensatory  
5 mechanisms.[15] Of the multiple instruments developed to assess frailty, frailty indexes  
6 (i.e., the ratio between accumulated deficits in a given person and the total possible  
7 deficits) may have utility in identifying people with frailty for end-of-life care across all  
8 disease groups.[8,16]  
9

10  
11  
12 A better understanding of how to provide the best palliative care for frail older people has  
13 become an international priority[17] and, considering the increased difficulty of  
14 identifying dying people in very old age (>85 years),[18–20] the concept of frailty is  
15 increasingly acknowledged as a cornerstone in the assessment and care of persons in an  
16 end-of-life situation and needing palliative care.[15,21] However, a consensus on how to  
17 use the concept of frailty to provide palliative care to end-of-life people remains to be  
18 established.[15,22,23] In this study, aimed at improving the care of end-of-life older  
19 people, we assessed the degree of frailty in a geriatric cohort with different advanced  
20 diseases and its relationship with end-of-life illness trajectories and survival.  
21  
22  
23  
24  
25  
26  
27  
28  
29  
30  
31  
32  
33  
34  
35  
36  
37  
38  
39

## 40 **METHODS**

### 41 **Study Design and Participants**

42  
43  
44 This was a prospective, observational study, including all patients admitted to the Acute  
45 Geriatric unit (AGU) at the University Hospital of Vic (Barcelona, Spain) during 12  
46 consecutive months (January 2014 – January 2015). The University Hospital of Vic is a  
47 200-bed acute care hospital covering a population area of 156,000 inhabitants. Admission  
48 criteria to the AGU were age  $\geq$  85 years, cognitive decline, and/or end-of-life situation;  
49 no exclusion criteria were defined. The methods, including study design, variables, data  
50  
51  
52  
53  
54  
55  
56  
57  
58  
59  
60

1  
2  
3 sources, and study size have been described in a previous study.[24] The results of this  
4  
5 subanalysis are reported according to the Strengthening the Reporting of Observational  
6  
7 Studies in Epidemiology (STROBE) recommendations.[25] All patients and family  
8  
9 relatives of patients with advanced dementia situation ( $GDS \geq 6$ ) signed the written  
10  
11 informed consent for participation before any data was recorded. The study protocol was  
12  
13 approved by the Ethics Committee of the University Hospital of Vic (2,014,850 PR80);  
14  
15 this study was conducted in accordance with the Helsinki Declaration and the local  
16  
17 Personal Data Protection Law (LOPD 15/1999).  
18  
19  
20  
21  
22

### 23 **Patient and Public Involvement**

24  
25  
26 This research was done without patient involvement. Patients were not invited to  
27  
28 comment on the study design and were not consulted to develop patient relevant outcomes  
29  
30 or interpret the results. Patients were not invited to contribute to the writing or editing of  
31  
32 this document for readability or accuracy.  
33  
34  
35  
36

### 37 **Variables and Data Sources**

38  
39  
40 Frailty was assessed using the Frail-VIG index, a tool consisting in 22 questions to assess  
41  
42 25 deficits commonly associated with age and adverse health outcomes, based on the  
43  
44 cumulative deficit model of frailty. Fifteen of the 22 questions refer to chronic  
45  
46 conditions, including geriatric conditions and syndromes. The Frail-VIG index is a  
47  
48 continuous variable ranging from 0 to 1 and classified into 4 groups: no frailty (Frail-VIG  
49  
50 index score  $<0.2$ ), mild frailty (Frail-VIG index score  $0.2-0.35$ ), moderate frailty (Frail-  
51  
52 VIG index score  $0.36-0.5$ ), and advanced frailty (Frail-VIG index score  $>0.5$ ). In addition  
53  
54 to its predicitive value, previous studies have shown the content, construct, criteria, and  
55  
56 convergent-divergent construct validity of the frail-VIG index [24,26,27]. End-of-life  
57  
58  
59  
60

1  
2  
3 people were identified using the NECPAL tool, a validated tool for the early identification  
4 of the need for palliative care among individuals with limited life expectancy.[28–30]  
5  
6 End-of-life people were classified into the 3 archetypal end-of-life trajectories according  
7  
8 to the severity and/or progression criteria for their main underlying disease: cancer, organ  
9  
10 failure (including chronic pulmonary disease, chronic heart disease, serious chronic liver  
11  
12 disease, and serious chronic renal disease), and dementia (including other chronic  
13  
14 neurological diseases). People with palliative care needs without a predominant advanced  
15  
16 disease were identified as "multimorbidity" group or trajectory, since all had 2 or more  
17  
18 underlying chronic conditions.  
19  
20  
21  
22  
23

24  
25 After inclusion of the last patient in the study (i.e., last admitted patient in the AGU before  
26  
27 January 15th, 2015) and before starting data analysis in 2017, patients were followed for  
28  
29 up to 24 months (2015 - beginning 2017). Information regarding the patient status after  
30  
31 the 24-month follow-up period was obtained from the Shared Medical Record in  
32  
33 Catalonia (HC3), a sole electronic database accessible to all healthcare providers in  
34  
35 Catalonia that allows healthcare professionals to reliably determine whether a patient is  
36  
37 "active" (alive) or deceased (including date of death).[31]  
38  
39  
40  
41

## 42 **Statistical Analysis**

43  
44  
45 Qualitative variables were presented as frequencies and percentages, whereas quantitative  
46  
47 variables were presented as the mean and the standard deviation (SD). Qualitative  
48  
49 variables were compared using the Pearson's chi-squared test. The concordance between  
50  
51 frailty degree and survival has been evaluated using the C-statistics and the ROC curves  
52  
53 were used to assess the ability of the Frail-VIG index to predict survival at 24 months by  
54  
55 measuring their AUC. Survival curves were plotted using the Kaplan-Meier estimator,  
56  
57 and survival curves for each illness trajectory were compared using the log-rank test. A  
58  
59  
60

1  
2  
3 Cox proportional hazards model with the interaction between frailty degree and illness  
4 trajectories was calculated. The assumption of proportional hazards was checked using  
5 the Schoenfeld residuals and a goodness-of-fit test. The significance level for all analyses  
6 was set at a two-sided  $\alpha=0.05$ . The descriptive statistics analysis of the variables was  
7 performed using the SPSS software program (IBM; Chicago, IL; USA), and the survival  
8 analysis was performed using the *survival* and *pROC* packages from the R project  
9 (<https://www.r-project.org>).

## 20 RESULTS

### 25 Patient Characteristics and End-of-life Status

26  
27  
28 The study included 590 patients with a mean (SD, range) age of 86.4 (5.6, 48-105) years,  
29 of whom 339 (57.5%) were women. Based on the Frail-VIG index scores, 543 (92%)  
30 patients showed some degree of frailty, with 111 (18.8%), 207 (35.1%), and 225 (38.1%)  
31 patients showing mild, moderate and advanced frailty, respectively. Of the 590 patients  
32 included, 53 (8.9%) died during hospitalization, and 260 (44.1%) were identified as end-  
33 of-life people; of these, 31 (11.9%), 79 (30.4%), 86 (33.1%), and 64 (24.6%) were  
34 classified in cancer, organ failure, dementia, and multimorbidity illness trajectories,  
35 respectively.

### 48 Relationship between End-of-life Status and Patient Characteristics

49  
50  
51 End-of-life people and non-end-of-life people had similar mean age and sex frequencies,  
52 but differed in the distribution among the 4 frailty groups: all end-of-life people (260) and  
53 283 (85.8%) of the 330 non-end-of-life people were frail to some extent, with 252  
54 (96.9%) and 180 (54.5%) showing moderate or advanced frailty in the end-of-life people  
55  
56  
57  
58  
59  
60

and non- end-of-life people group, respectively. Table 1 summarizes the frequencies of end-of-life and non-end-of-life people across the various frailty categories and their main demographic characteristics.

**Table 1.** Classification of study patients according to the Frail-VIG index scores, demographic characteristics, and end-of-life status (n=590)

|         | Demographic characteristics |                  | Frailty Degree, n (%) |              |                  |                  |
|---------|-----------------------------|------------------|-----------------------|--------------|------------------|------------------|
|         | Age (years), mean (SD)      | Sex (% of women) | Not frail             | Mild Frailty | Moderate Frailty | Advanced Frailty |
| EOLp    | 86.3 (5.8)                  | 54.6             | 0 (0)                 | 8 (3.1)      | 68 (26.1)        | 184 (70.8)       |
| NonEOLp | 86.5 (5.4)                  | 59.7             | 47 (14.3)             | 103 (31.2)   | 139 (42.1)       | 41 (12.4)        |

EOLp: End-of-life people, NonEOLp: Non End-of-life people; SD, standard deviation

Correspondingly, median Frail-VIG index scores were significantly higher in end-of-life compared to non-end-of-life people: 0.56 and 0.36, respectively ( $p < 0.001$ ). In end-of-life people, the predominant frailty degree was persistently advanced for all end-of-life trajectory categories: cancer, organ failure, dementia, and multimorbidity (range 68-75%) (Table 2). All end-of-life people in the multimorbidity trajectory (n=64) were classified in the moderate and advanced frailty groups.

**Table 2.** Classification of end-of-life people according to demographic characteristics, Frail-VIG index scores and end-of-life trajectory (n=260), n (%)

|  | Demographic characteristics |                  | Frailty degree, n (%) |              |                  |                  | Total |
|--|-----------------------------|------------------|-----------------------|--------------|------------------|------------------|-------|
|  | Age (years),                | Sex (% of women) | Not frail             | Mild Frailty | Moderate Frailty | Advanced Frailty |       |

|                | <i>mean</i> |      |       |         |           |            |           |
|----------------|-------------|------|-------|---------|-----------|------------|-----------|
|                | <i>(SD)</i> |      |       |         |           |            |           |
| Cancer         | 85.7 (5.4)  | 45.2 | 0 (0) | 3 (9.7) | 7 (22.6)  | 21 (67.7)  | 31 (11.9) |
| Organ Failure  | 86.9 (5.3)  | 46.8 | 0 (0) | 4 (5.1) | 20 (25.3) | 55 (69.6)  | 79 (30.4) |
| Dementia       | 85.4 (5.3)  | 65.1 | 0 (0) | 1 (1.1) | 25 (29.1) | 60 (69.8)  | 86 (33.1) |
| Multimorbidity | 86.9 (7.3)  | 54.7 | 0 (0) | 0 (0)   | 16 (25.0) | 48 (75.0)  | 64 (24.6) |
| Total          | N/A         | N/A  | 0 (0) | 8 (3.1) | 68 (26.1) | 184 (70.8) | 260       |

N/A, not applicable; SD, standard deviation

### Relationship between Frailty Degree and Survival

During the 2-year follow up period, a total of 338 (57.3%) study patients died. Mortality was significantly higher in end-of-life people than in non-end-of-life people: 220 (84.6%) and 118 (35.7%), respectively ( $p < 0.001$ ). The log-rank test comparing the survival curves of each frailty degree revealed significant differences in the overall population ( $X^2 = 423$ ,  $p < 0.0001$ ), end-of-life people ( $X^2 = 69.9$ ,  $p < 0.0001$ ), and non-end-of-life people ( $X^2 = 122$ ,  $p < 0.0001$ ) (Figure 1). Correspondingly, the C coefficient for concordance between the survival time and the Frail-VIG score was 0.8, indicating that higher scores of the Frail-VIG index are associated with lower survival.

The frequencies of death at the end of the 2-year follow-up period for each trajectory in end-of-life people are presented in Table 3. Survival curves, plotted using the Kaplan-Meier model for each frailty category (i.e., mild, intermediate, and advanced), differed among the different end-of-life trajectories, revealing different patterns of survival decline according to the frailty degree (Figure 2). A Cox regression model with the interaction between Frail-VIG index and illness trajectories revealed that the effect of the frailty degree on survival was associated with illness trajectories ( $p < 0.01$  for all the coefficients), even though the influence of illness trajectory progressively decreased as

the frailty degree increased (Figure 3). The proportional hazard assumption was supported by the Schoenfeld residuals ( $p > 0.1$  for both global and each covariate tests). The estimated hazard ratios for the Frail-VIG index were 1.61 for people with dementia (95% CI=1.43-1.81), 1.30 for people with organ failure (95% CI=1.18-1.43), 1.30 for people with multimorbidity (95% CI=1.18-1.42), and 1.13 for people with cancer (95% CI=1.02-1.25). These results show that for each additional deficit (i.e., 0.04 increase in the Frail-VIG index) the risk of death increased by 61.5%, 30.1%, 29.6% and 12.9% in people with dementia, organ failure, multimorbidity and cancer, respectively.

**Table 3.** Status of end-of-life people according to the Frail-VIG index scores and end-of-life trajectory after the 2-year follow-up (n=260), n (%)

|                | n  | Status | Mild Frailty | Moderate Frailty | Advanced Frailty | Total     |
|----------------|----|--------|--------------|------------------|------------------|-----------|
| Cancer         | 31 | Dead   | 2 (6.5)      | 7 (22.6)         | 21 (67.7)        | 30 (96.8) |
|                |    | Alive  | 1 (3.2)      | 0 (0)            | 0 (0)            | 1 (3.2)   |
| Organ Failure  | 79 | Dead   | 2 (2.5)      | 16 (20.2)        | 54 (68.4)        | 72 (91.1) |
|                |    | Alive  | 2 (2.5)      | 4 (5.1)          | 1 (1.3)          | 7 (8.9)   |
| Dementia       | 86 | Dead   | 1 (1.2)      | 6 (6.9)          | 55 (64.0)        | 62 (72.1) |
|                |    | Alive  | 0 (0)        | 19 (22.1)        | 5 (5.8)          | 24 (27.9) |
| Multimorbidity | 64 | Dead   | 0 (0)        | 8 (12.5)         | 48 (75.0)        | 56 (87.5) |
|                |    | Alive  | 0 (0)        | 8 (12.5)         | 0 (0)            | 8 (12.5)  |

### Prognosis Value of the Frail-VIG Index

The prognostic value of the Frail-VIG index for the end-of-life people (expressed as the AUC of the ROC analysis) was 0.87 (95% CI:0.83-0.92) after one year and 0.87 (95% CI:0.84-0.92) after two years of follow-up. Of the 184 end-of-life people with advanced

1  
2  
3 frailty (Frail-VIG index score > 0.5), 178 (96.7%) had died at two years of follow-up.  
4  
5 The AUC differed among each of the four end-of-life trajectories: cancer (1 and 0.93),  
6  
7 organ failure (0.86 and 0.90), dementia (0.92 and 0.92) and multimorbidity (0.91 and  
8  
9 0.94), after one and two years of follow-up, respectively. Regarding the sensitivity and  
10  
11 specificity of the Frail-VIG index as prognosis factor of mortality, the most sensitive and  
12  
13 specific cut-off was 0.5 at both one and two years after follow-up, showing a sensitivity  
14  
15 of 0.81 and 0.85 and a specificity of 0.83 and 0.81, respectively.  
16  
17  
18  
19

## 20 **DISCUSSION**

21  
22  
23  
24 In this prospective, observational study including 590 patients admitted at an Acute  
25  
26 Geriatric unit (AGU), we found that all older patients were frail towards the end of life  
27  
28 (the prevalence of moderate-to-advanced frailty was 97% among people within an end-  
29  
30 of-life trajectory and 55% outside it). Furthermore, advanced frailty was the predominant  
31  
32 frailty category (ranged 68 to 75%) for all end-of-life trajectories: cancer, organ failure,  
33  
34 dementia, and multimorbidity. Overall, the Frail-VIG index had a high capacity to predict  
35  
36 death at one and two years (AUC 0.87), albeit to a different extent for the end-of-life  
37  
38 categories cancer, organ failure, dementia and multimorbidity (AUC was always >0.86  
39  
40 for mortality at either one or two years). This finding confirms the hypothesis that the  
41  
42 degree of frailty is related to prognosis regardless of the illness trajectory.  
43  
44  
45  
46  
47

48  
49 The characteristics and outcomes of the cohort assessed in this study, which included all  
50  
51 patients admitted to an Acute Geriatric unit (AGU), were similar to those previously  
52  
53 reported. All the persons assessed in this study had a Frail-VIG index score <0.8, similar  
54  
55 to previous studies showing that the theoretical maximum score is 0.7. According to these  
56  
57 studies, the accumulation of 2/3 of all possible deficits (Frailty index score >0.7) results  
58  
59 in death due to the person's inability to overcome more deficits, a phenomenon defined  
60



1  
2  
3 as system failure.[32,33] Likewise, similar to previous studies in other populations, the  
4 mortality rate at 1 to 2 years in our cohort was nearly 100% for the end of life people with  
5 frailty index score  $>0.5$ . [33,34]  
6  
7

8  
9  
10 Furthermore, we provide evidence showing that the degree of frailty significantly  
11 influenced survival irrespective of the advanced illness and end-of-life trajectory. In spite  
12 of this general influence, the survival curves according to the frailty degree followed  
13 different patterns for the four end-of-life trajectories, enabling the description of different  
14 frailty or deficit accumulation end-of-life trajectories according to the main disease,  
15 specially in the absence of advanced frailty. As the frailty degree increased, differences  
16 between trajectories decreased, resulting in a trend towards a compression of survival  
17 curves in advanced frailty situations where mortality is very high irrespective of the main  
18 advanced illness and end-of-life trajectory. Thus, in end-of-life people with cancer,  
19 mortality rates were high regardless of the frailty degree (moderate or advanced), leading  
20 to the hypothesis, similar to recent studies, that cancer patients have a catastrophic  
21 accumulation of deficits.[35] In contrast, end-of-life people with dementia showed  
22 different mortality rates according to their frailty degree and died progressively, likely  
23 due to the natural history of the disease, suggesting a slower accumulation of deficits.  
24 People with multimorbidity and advanced frailty shows a survival profile similar to  
25 people with cancer, while those with moderate frailty have a survival rate more similar to  
26 people with dementia. Finally, persons with an organ disease would accumulate deficits  
27 in episodes, even though prospective studies with serial frailty indexes would be required  
28 to test this hypothesis.  
29  
30  
31  
32  
33  
34  
35  
36  
37  
38  
39  
40  
41  
42  
43  
44  
45  
46  
47  
48  
49  
50  
51  
52  
53

54  
55 In this regard, similar to recent studies describing different trajectories according to the  
56 evolution of the social, spiritual or psychological situation of end-of-life people,[3]  
57 prospective studies following the degree of frailty using electronic frailty indexes have  
58  
59  
60

1  
2  
3 described three different trajectories (i.e., rapidly rising frailty, moderately increasing  
4 frailty, and stable frailty).[35] Even though more studies would be required to describe  
5 different end-of-life frailty trajectories, the fact that each end-of-life trajectory resulted in  
6 different mortality curves supports a dynamic view of end-of-life people.  
7  
8  
9

10  
11  
12  
13 The traditional association of frailty to the “third end-of-life trajectory” (i.e., dementia)  
14 [13,14] has probably been influenced by the lack of specific prognostic instruments for  
15 persons in this trajectory, unlike those in the cancer [36,37] or organ disease [38,39]  
16 trajectories. Our results regarding the high prevalence of frailty in all end-of-life  
17 trajectories support the validity of the concept that frailty may be present in all trajectories  
18 beyond the dementia trajectory. In addition to expanding the concept of frailty, our study  
19 underscores the need to consider a further development of the end-of-life trajectories. Of  
20 the 260 people who were identified as people in end-of-life situation, 24.6% did not have  
21 severity criteria for a single disease, although all of them had at least 2 chronic conditions.  
22 The identification of this cluster of people with advanced frailty and multimorbidity can  
23 help provide them early palliative care, and the benefits derived from it.[40,41]  
24  
25  
26  
27  
28  
29  
30  
31  
32  
33  
34  
35  
36  
37  
38  
39

40 Frailty Indices based on a Comprehensive Geriatric Assessment, such as the Frail-VIG  
41 index, may help professionals address one of the current challenges in palliative care  
42 [18,19,42]: the identification, assessment, and management of older people (i.e., aged  
43 >80 years) with palliative care needs [20,43]. First, assessment and quantification of  
44 frailty degree, which is suitable to synthesize the results of a multidimensional evaluation,  
45 can be useful to validate the identification of people in an end-of-life situation;[12]  
46 secondly, due to its ability to discriminate between different degrees of severity, frailty  
47 indexes can be very useful to healthcare professionals for the situational diagnosis of the  
48 first and second end-of-life transition,[6,12] and monitorization of end-of-life people  
49 evolution;[44,45] and finally, quantification of frailty would enable palliative care  
50  
51  
52  
53  
54  
55  
56  
57  
58  
59  
60

1  
2  
3 customization [46,47] and engage people, caregivers and healthcare professionals in  
4 sharing decision-making and advance care planning.  
5  
6

7  
8 The results of this study should be interpreted in the context of some limitations,  
9 particularly regarding the generalizability of the results. Firstly, the recruitment strategy  
10 based on an AGU solely was likely to enrich our study sample with older patients, likely  
11 precluding the applicability of these study results to younger patients. Secondly, the  
12 analysis of end-of-life people frailty across the various end-of-life trajectory categories  
13 importantly reduced the number of patients in each group, thus limiting the statistical  
14 power of these analyses. However, despite the reduced number of patients in some  
15 groups, our analysis yielded statistically significant results. In spite of its limitations, to  
16 our knowledge, this study is the first to evaluate the degree of frailty using a frailty index  
17 in very old patients identified as end-of-life people. Frailty was evaluated in a cohort of  
18 geriatric patients, including end-of-life and non-end-of-life people, and the data for this  
19 study was collected during routine geriatric assessment, as opposed to previous studies  
20 that used electronic health record data to evaluate the degree of frailty.[48] Moreover, the  
21 single computer information system of Catalonia (HC3) that collects the medical records  
22 and mortality status of all patients reported by all health providers prevented loss of  
23 patients up to follow-up.[31] Consequently, the lack of missing data due to the HC3  
24 system, along with the use of standard and validated tools to identify end-of-life people  
25 (NECPAL) and to measure frailty (Frail-VIG index) increased the accuracy of the results  
26 obtained from this study. The early identification of people needing palliative care and  
27 the more accurate definition of the various end-of-life trajectories opened the door to a  
28 novel perspective of palliative care.[49] In this regard, the use of frailty as an overarching  
29 concept in the assessment of all people in an end-of-life situation —at least of those with  
30  
31  
32  
33  
34  
35  
36  
37  
38  
39  
40  
41  
42  
43  
44  
45  
46  
47  
48  
49  
50  
51  
52  
53  
54  
55  
56  
57  
58  
59  
60

1  
2  
3 a multimorbid profile— might contribute to go one step further in this novel approach to  
4  
5 palliative care.  
6  
7

## 8 9 **CONCLUSIONS**

10  
11  
12 Our results showed that all end-of-life people were frail (mostly with advanced frailty)  
13  
14 irrespective of the end-of-life trajectory. Their degree of frailty, measured using the Frail-  
15  
16 VIG index, influenced mortality. This indicates a close relationship between frailty, end-  
17  
18 of-life status, and mortality for all people who die. Measuring frailty using a frailty index  
19  
20 could be useful in routine practice for healthcare professionals to understand the  
21  
22 heterogeneous nature of people needing palliative care and tailor their care to the patient's  
23  
24 needs. The survival pattern of people with multimorbidity could support the description  
25  
26 of a composite illness trajectory for this patient group.  
27  
28  
29  
30  
31  
32  
33  
34

## 35 36 **DECLARATIONS**

### 37 38 39 **Ethics Approval and Consent to Participate**

40  
41  
42 All patients and family relatives of patients with advanced dementia situation ( $GDS \geq 6$ )  
43  
44 signed the written informed consent for participation before any data was recorded. The  
45  
46 study protocol was approved by the Ethics Committee of the University Hospital of Vic  
47  
48 (2,014,850 PR80). This study was conducted in accordance with the Helsinki Declaration  
49  
50 and the local Personal Data Protection Law (LOPD 15/1999).  
51  
52  
53  
54  
55  
56  
57  
58  
59  
60

## Consent for publication

Not applicable.

## Data Sharing

The anonymized datasets analyzed during the current study are available from the corresponding author on reasonable request.

## Competing interests

The authors declare no conflict of interest.

## Funding

This study was funded by the Instituto de Salud Carlos III (ISCIII) 17/02240 grant

## Author's contributions

JAN, AT, JCM, and XGB were responsible for the conception and design of the study. JAN coordinated and substantially contributed to the data collection. JCM and RO performed the statistical analysis. All authors (JAN, SAM, AT, JCM, SM, RO, NL, JE, SS and XGB) were involved in interpretation of data. JAN wrote the initial draft of the manuscript and all the other authors (SAM, AT, JCM, SM, RO, NL, JE, SS and XGB) critically revised the manuscript. All authors (JAN, SAM, AT, JCM, SM, RO, NL, JE, SS and XGB) have provided approval for the final version of the manuscript submitted for publication and agree to be accountable for all aspects of the work.

## Acknowledgements

The authors would like to acknowledge i2e3 Biomedical Research Institute for providing medical writing assistance.

## REFERENCES

- 1 Boyd K, Murray SSA. Recognising and managing key transitions in end of life care. *BMJ* 2010;**341**:c4863. doi:10.1136/bmj.c4863
- 2 Gomez-Batiste X, Martinez-Munoz M, Blay C, *et al.* Identifying patients with chronic conditions in need of palliative care in the general population: development of the NECPAL tool and preliminary prevalence rates in Catalonia. *BMJ Support Palliat Care* 2013;**3**:300–8. doi:10.1136/bmjspcare-2012-000211
- 3 Murray SA, Kendall M, Mitchell G, *et al.* Palliative care from diagnosis to death. *BMJ* 2017;**356**:j878. doi:10.1136/bmj.j878
- 4 Kimbell B, Murray SA, Macpherson S BK. Embracing inherent uncertainty in advanced illness. *BMJ Br Med J* 2016;**354**:i3802.
- 5 Gómez-Batiste X, Blay C, Broggi MA, *et al.* Ethical Challenges of Early Identification of Advanced Chronic Patients in Need of Palliative Care. *J Palliat Care* 2018;**33**:247–51. doi:10.1177/0825859718788933
- 6 Amblàs-Novellas J, Espauella J, Rexach L *et al.* Frailty, severity, progression and shared decision-making: A pragmatic framework for the challenge of clinical complexity at the end of life. *Eur Geriatr Med* 2015;**6**:189–194. doi:10.1016/j.eurger.2015.01.002

- 1  
2  
3 7 Cardona-Morrell M, Lewis E, Suman S, *et al.* Recognising older frail patients near  
4 the end of life: What next? *Eur J Intern Med* 2017;**45**:84–90.  
5  
6 doi:10.1016/j.ejim.2017.09.026  
7  
8  
9  
10  
11 8 Koller K, Rockwood K. Frailty in older adults: Implications for end-of-life care.  
12  
13 *Cleve Clin J Med* 2013;**80**:168–74. doi:10.3949/ccjm.80a.12100  
14  
15  
16  
17 9 Stow D, Spiers G, Matthews FE, *et al.* What is the evidence that people with frailty  
18 have needs for palliative care at the end of life? A systematic review and narrative  
19 synthesis. *Palliat Med* 2019;**33**:399–414. doi:10.1177/0269216319828650  
20  
21  
22  
23  
24 10 Mousa A, Savva GM, Mitnitski A, *et al.* Is frailty a stable predictor of mortality  
25 across time? Evidence from the Cognitive Function and Ageing Studies. *Age*  
26  
27 *Ageing* 2018;**47**:721–7. doi:10.1093/ageing/afy077  
28  
29  
30  
31  
32 11 Pialoux T, Goyard J, Hermet R. When frailty should mean palliative care. *J Nurs*  
33  
34 *Educ Pract* 2013;**3**:75–84. doi:10.5430/jnep.v3n7p75  
35  
36  
37  
38 12 Pollack LR, Goldstein NE, Gonzalez WC, *et al.* The Frailty Phenotype and  
39 Palliative Care Needs In Older Survivors of Critical Illness Lauren. *J Am Geriatr*  
40  
41 *Soc* 2018;**65**:1168–75. doi:10.1111/jgs.14799.The  
42  
43  
44  
45  
46 13 Lunney JR, Lynn J, Foley DJ, *et al.* Patterns of functional decline at the end of life.  
47  
48 *JAMA* 2003;**289**:2387–92. doi:10.1001/jama.289.18.2387  
49  
50  
51  
52 14 Murray S a, Boyd K, Sheikh A. Palliative care in chronic illness. *BMJ*  
53  
54 2005;**330**:611–2. doi:10.1136/bmj.330.7492.611  
55  
56  
57  
58 15 Rodríguez-Mañas L, Féart C, Mann G, *et al.* Searching for an operational  
59 definition of frailty: A delphi method based consensus statement. the frailty  
60

- operative definition-consensus conference project. *Journals Gerontol - Ser A Biol Sci Med Sci* 2013;**68**:62–7. doi:10.1093/gerona/gls119
- 16 Cesari M, Gambassi G, van Kan GA, *et al*. The frailty phenotype and the frailty index: different instruments for different purposes. *Age Ageing* 2014;**43**:10–2. doi:10.1093/ageing/aft160
- 17 Bone AE, Morgan M, Maddocks M, *et al*. Developing a model of short-term integrated palliative and supportive care for frail older people in community settings: perspectives of older people, carers and other key stakeholders. *Age Ageing* 2016;**45**:863–73. doi:10.1093/ageing/afw124
- 18 Moriarity J, Rutter D, Ross PD, *et al*. End of life care for people with dementia living in care homes. 2012;;4p.
- 19 Dixon J, King D, Matosevic T, *et al*. Equity in the provision of palliative care in the UK: Review of evidence. 2015;;145.
- 20 Teggi D. Unexpected death in ill old age: An analysis of disadvantaged dying in the English old population. *Soc Sci Med* 2018;**217**:112–20. doi:10.1016/j.socscimed.2018.09.048
- 21 Cesari M, Prince M, Thiyagarajan JA, *et al*. Frailty: An Emerging Public Health Priority. *J Am Med Dir Assoc* 2016;**17**:188–92. doi:10.1016/j.jamda.2015.12.016
- 22 Moorhouse P, Rockwood K, Morley JE, *et al*. Frailty Consensus: A Call to Action. *J Am Med Dir Assoc* 2013;**14**:392–7. doi:http://dx.doi.org/10.1016/j.jamda.2013.03.022
- 23 British Geriatrics Society. End of Life Care in Frailty: Identification and



- 1  
2  
3 prognostication | British Geriatrics Society.  
4  
5 [https://www.bgs.org.uk/resources/end-of-life-care-in-frailty-identification-and-](https://www.bgs.org.uk/resources/end-of-life-care-in-frailty-identification-and-prognostication)  
6  
7 prognostication (accessed 29 Nov 2020).  
8  
9  
10  
11 24 Amblàs-Novellas J, Martori JC, Espauella J, *et al.* Frail-VIG index: a concise  
12 frailty evaluation tool for rapid geriatric assessment. *BMC Geriatr* 2018;**18**:29.  
13 doi:10.1186/s12877-018-0718-2  
14  
15  
16  
17  
18 25 von Elm E, Altman DG, Egger M, *et al.* The Strengthening the Reporting of  
19 Observational Studies in Epidemiology (STROBE) statement: guidelines for  
20 reporting observational studies. *Lancet* 2007;**370**:1453–7. doi:10.1016/S0140-  
21 6736(07)61602-X  
22  
23  
24  
25  
26  
27  
28 26 Amblàs-Novellas J, Martori JC, Molist Brunet N, *et al.* Frail-VIG index: Design  
29 and evaluation of a new frailty index based on the Comprehensive Geriatric  
30 Assessment. *Rev Esp Geriatr Gerontol* 2017;**52**:119–27.  
31 doi:10.1016/j.regg.2016.09.003  
32  
33  
34  
35  
36  
37  
38 27 Moreno-Ariño M, Torrente Jiménez I, Cartanya Gutiérrez A, *et al.* Assessing the  
39 strengths and weaknesses of the Clinical Frailty Scale through correlation with a  
40 frailty index. *Aging Clin Exp Res* 2020;**32**:2225–32. doi:10.1007/s40520-019-  
41 01450-w  
42  
43  
44  
45  
46  
47  
48 28 Gómez-Batiste X, Martínez-Muñoz M, Blay C, *et al.* Prevalence and  
49 characteristics of patients with advanced chronic conditions in need of palliative  
50 care in the general population: A cross-sectional study. *Palliat Med* 2014;**28**:302–  
51 11. doi:10.1177/0269216313518266  
52  
53  
54  
55  
56  
57  
58 29 Gómez-Batiste X, Turrillas P, Tebé C, *et al.* NECPAL tool prognostication in  
59  
60

- 1  
2  
3 advanced chronic illness: A rapid review and expert consensus. *BMJ Support*  
4 *Palliat Care* Published Online First: 2020. doi:10.1136/bmjspcare-2019-002126  
5  
6  
7  
8  
9 30 CENTRAL CATALONIA CHRONICITY RESEARCH GROUP. Utility of  
10 NECPAL. <https://en.c3rg.com/necpal> (accessed 29 Nov 2020).  
11  
12  
13  
14 31 Solans O, Gallego C, Garcia-Cuyas F, *et al*. Shared Medical Record, Personal  
15 Health Folder and Health and Social Integrated Care in Catalonia. In: *New*  
16 *Perspectives in Medical Records*. Springer, Cham 2017. 49–64. doi:10.1007/978-  
17 3-319-28661-7\_4  
18  
19  
20  
21  
22  
23  
24 32 Rockwood K, Mitnitski A. Frailty Defined by Deficit Accumulation and Geriatric  
25 Medicine Defined by Frailty. *Clin. Geriatr. Med.* 2011;**27**:17–26.  
26 doi:10.1016/j.cger.2010.08.008  
27  
28  
29  
30  
31  
32 33 Rockwood K, Mitnitski A. Limits to deficit accumulation in elderly people. *Mech*  
33 *Age Dev* 2006;**127**:494–6. doi:10.1016/j.mad.2006.01.002  
34  
35  
36  
37  
38 34 Rockwood K, Rockwood MRH, Mitnitski A. Physiological redundancy in older  
39 adults in relation to the change with age in the slope of a frailty index. *J Am Geriatr*  
40 *Soc* 2010;**58**:318–23. doi:10.1111/j.1532-5415.2009.02667.x  
41  
42  
43  
44  
45  
46 35 Stow D, Matthews FE, Hanratty B. Frailty trajectories to identify end of life: A  
47 longitudinal population-based study. *BMC Med* 2018;**16**:1–7.  
48 doi:10.1186/s12916-018-1148-x  
49  
50  
51  
52  
53 36 Evans C, McCarthy M. Prognostic uncertainty in terminal care: can the Karnofsky  
54 index help? *Lancet (London, England)* 1985;**1**:1204–6. doi:10.1016/s0140-  
55 6736(85)92876-4  
56  
57  
58  
59  
60

- 1  
2  
3 37 Anderson F, Downing GM, Hill J, *et al.* Palliative Performance Scale (PPS): A  
4 new tool. *J Palliat Care* 1996;**12**:5–11.  
5  
6  
7  
8  
9 38 van Dijk WD, van den Bemt L, van den Haak-Rongen S, *et al.* Multidimensional  
10 prognostic indices for use in COPD patient care. A systematic review. *Respir. Res.*  
11 2011;**12**:151. doi:10.1186/1465-9921-12-151  
12  
13  
14  
15  
16 39 Walter LC, Brand RJ, Counsell SR, *et al.* Development and validation of a  
17 prognostic index for 1-year mortality in older adults after hospitalization. *JAMA*  
18 2001;**285**:2987–94. doi:10.1001/jama.285.23.2987  
19  
20  
21  
22  
23  
24 40 Moine S, Murray SA, Boyd K, *et al.* Palliative care and the endless cycle of serious  
25 health-related suffering. *Lancet.* 2018;**392**:471–2. doi:10.1016/S0140-  
26 6736(18)31195-4  
27  
28  
29  
30  
31  
32 41 Aldridge MD, Bradley EH. Epidemiology and patterns of care at the end of life:  
33 Rising complexity, shifts in care patterns and sites of death. *Health Aff*  
34 2017;**36**:1175–83. doi:10.1377/hlthaff.2017.0182  
35  
36  
37  
38  
39  
40 42 (NCPC) NC for PC. National Council for Palliative Care ( NCPC ) Briefing The  
41 Government ' s National Commitment For End Of Life Care. 2016.  
42  
43  
44  
45  
46 43 PA C, GE G, DA R, *et al.* Prediction of appropriate timing of palliative care for  
47 older adults with non-malignant life-threatening disease: a systematic review. *Age*  
48 *Ageing* 2005;**34**. doi:10.1093/AGEING/AFI054  
49  
50  
51  
52  
53  
54 44 Gill TM, Gahbauer E a, Allore HG, *et al.* Transitions between frailty states among  
55 community-living older persons. *Arch Intern Med* 2006;**166**:418–23.  
56  
57  
58  
59  
60

- 1  
2  
3 45 Liu ZY, Wei YZ, Wei LQ, *et al.* Frailty transitions and types of death in Chinese  
4  
5 older adults: A population-based cohort study. *Clin Interv Aging* 2018;**13**:947–56.  
6  
7 doi:10.2147/CIA.S157089  
8  
9  
10  
11 46 The Picker Institute. *Patient - Centered Care 2015 : Scenarios , Vision , Goals &*  
12  
13 *Next Steps.* 2004.  
14  
15  
16 47 Cohen-Mansfield J, Skornick-Bouchbinder M, Brill S. Trajectories of End of Life:  
17  
18 A Systematic Review. *Journals Gerontol - Ser B Psychol Sci Soc Sci* 2018;**73**:564–  
19  
20 72. doi:10.1093/geronb/gbx093  
21  
22  
23  
24 48 Clegg A, Bates C, Young J, *et al.* Development and validation of an electronic  
25  
26 frailty index using routine primary care electronic health record data. *Age Ageing*  
27  
28 2016;**45**:353–60. doi:10.1093/ageing/afw039  
29  
30  
31  
32 49 Amblàs-Novellas J, Murray SA, Espauella J, *et al.* Identifying patients with  
33  
34 advanced chronic conditions for a progressive palliative care approach: a cross-  
35  
36 sectional study of prognostic indicators related to end-of-life trajectories. *BMJ*  
37  
38 *Open* 2016;**6**:e012340. doi:10.1136/bmjopen-2016-012340  
39  
40  
41  
42  
43  
44  
45  
46  
47  
48  
49  
50  
51  
52  
53  
54  
55  
56  
57  
58  
59  
60

## FIGURE LEGENDS

**Figure 1.** Survival according to the degree of frailty in (A) the total study patients, (B) end-of-life people, and (C) Non End-of-life people.

**Figure 2.** Survival according to the degree of frailty and end-of-life trajectory: (A) cancer, (B) organ failure, (C) dementia, and (D) Multimorbidity.

**Figure 3.** Survival probability of end-of-life people in the different illness trajectories according to Frail-VIG index value: Frail-VIG index 0.44 (15th percentile) (A), Frail-VIG index 0.56 (median) (B) and Frail-VIG index 0.68 (90th percentile) (C).

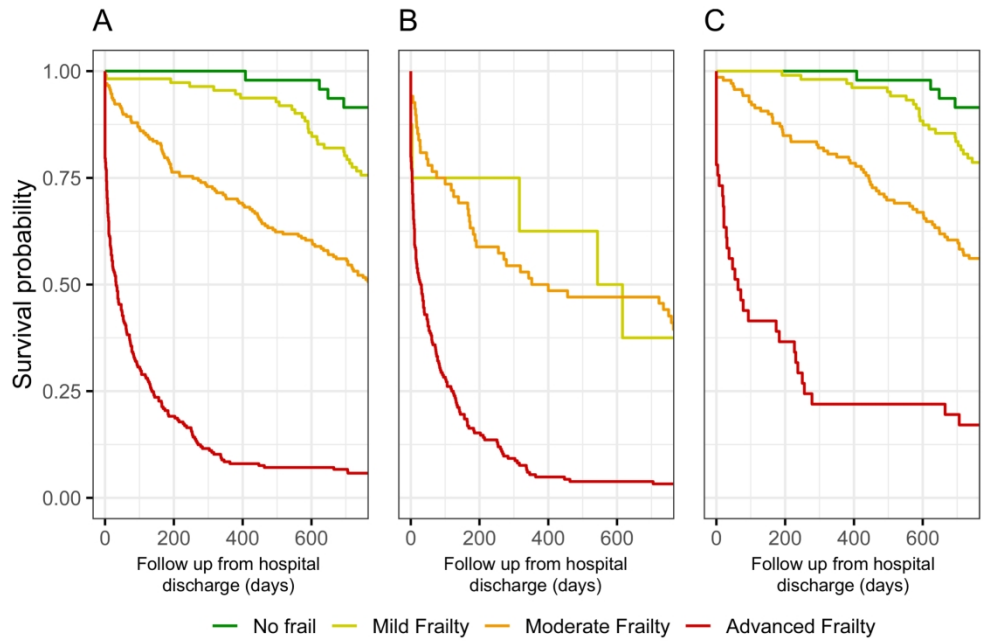

Figure 1. Survival according to the degree of frailty in (A) the total study patients, (B) end-of-life people, and (C) Non End-of-life people.

860x556mm (72 x 72 DPI)

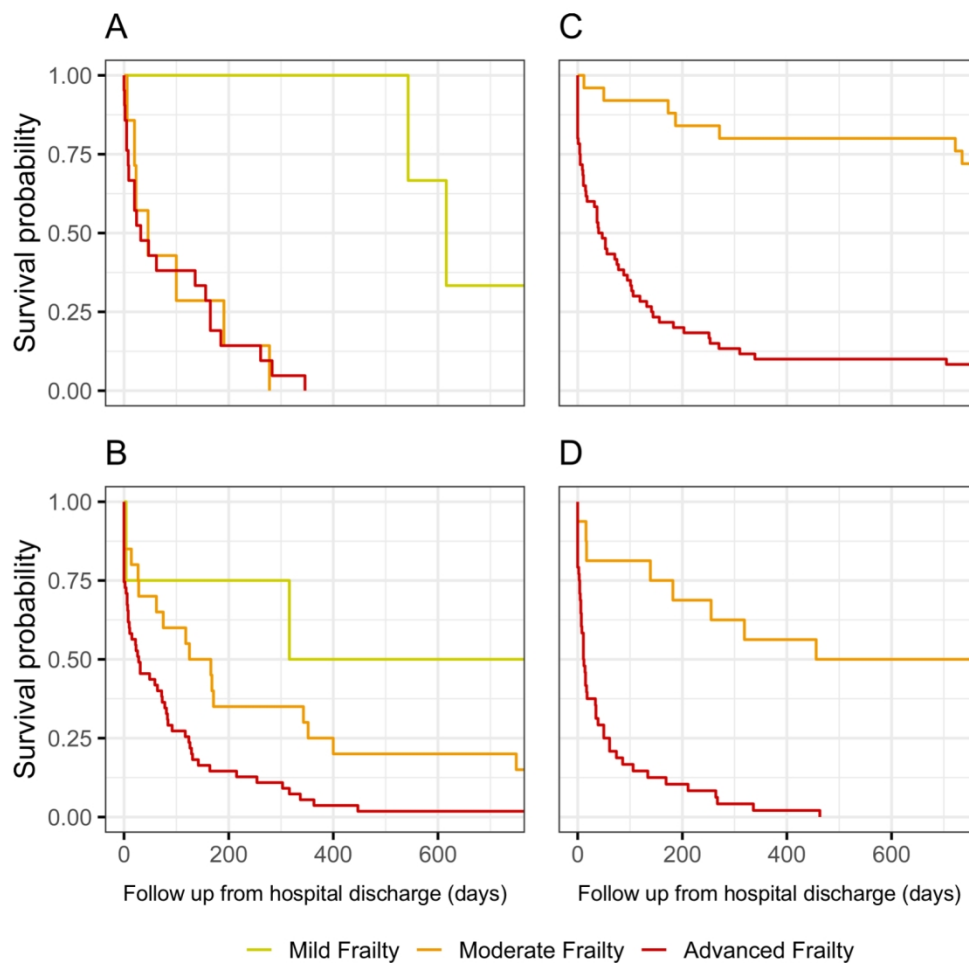

Figure 2. Survival according to the degree of frailty and end-of-life trajectory: (A) cancer, (B) organ failure, (C) dementia, and (D) Multimorbidity.

616x593mm (72 x 72 DPI)

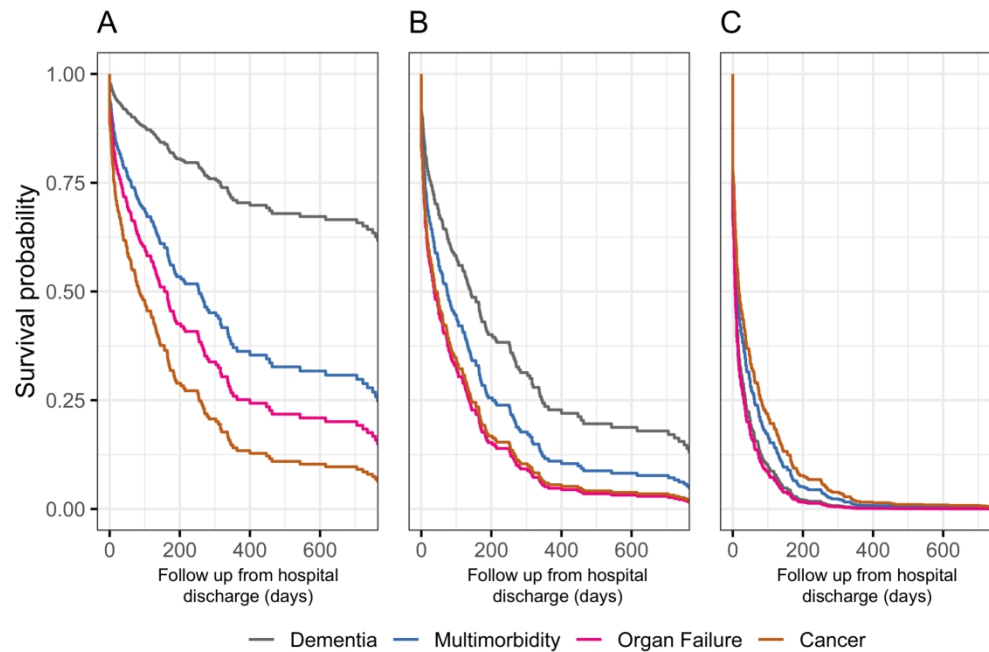

Figure 3. Survival probability of end-of-life people in the different illness trajectories according to Frail-VIG index value: Frail-VIG index 0.44 (15th percentile) (A), Frail-VIG index 0.56 (median) (B) and Frail-VIG index 0.68 (90th percentile) (C).

874x564mm (72 x 72 DPI)



STROBE Statement—Checklist of items that should be included in reports of *cohort studies*

|                           | Item No | Recommendation                                                                                                                                                                                                                                                                                                         | Page No                     |
|---------------------------|---------|------------------------------------------------------------------------------------------------------------------------------------------------------------------------------------------------------------------------------------------------------------------------------------------------------------------------|-----------------------------|
| <b>Title and abstract</b> | 1       | (a) Indicate the study's design with a commonly used term in the title or the abstract<br>(b) Provide in the abstract an informative and balanced summary of what was done and what was found                                                                                                                          | 1, 3<br>3, 4                |
| <b>Introduction</b>       |         |                                                                                                                                                                                                                                                                                                                        |                             |
| Background/rationale      | 2       | Explain the scientific background and rationale for the investigation being reported                                                                                                                                                                                                                                   | 5-6                         |
| Objectives                | 3       | State specific objectives, including any prespecified hypotheses                                                                                                                                                                                                                                                       | 6                           |
| <b>Methods</b>            |         |                                                                                                                                                                                                                                                                                                                        |                             |
| Study design              | 4       | Present key elements of study design early in the paper                                                                                                                                                                                                                                                                | 6                           |
| Setting                   | 5       | Describe the setting, locations, and relevant dates, including periods of recruitment, exposure, follow-up, and data collection                                                                                                                                                                                        | 6                           |
| Participants              | 6       | (a) Give the eligibility criteria, and the sources and methods of selection of participants. Describe methods of follow-up<br>(b) For matched studies, give matching criteria and number of exposed and unexposed                                                                                                      | 6, 8<br>N/A                 |
| Variables                 | 7       | Clearly define all outcomes, exposures, predictors, potential confounders, and effect modifiers. Give diagnostic criteria, if applicable                                                                                                                                                                               | 7                           |
| Data sources/measurement  | 8*      | For each variable of interest, give sources of data and details of methods of assessment (measurement). Describe comparability of assessment methods if there is more than one group                                                                                                                                   | 7                           |
| Bias                      | 9       | Describe any efforts to address potential sources of bias                                                                                                                                                                                                                                                              | N/A                         |
| Study size                | 10      | Explain how the study size was arrived at                                                                                                                                                                                                                                                                              | 6                           |
| Quantitative variables    | 11      | Explain how quantitative variables were handled in the analyses. If applicable, describe which groupings were chosen and why                                                                                                                                                                                           | 8                           |
| Statistical methods       | 12      | (a) Describe all statistical methods, including those used to control for confounding<br>(b) Describe any methods used to examine subgroups and interactions<br>(c) Explain how missing data were addressed<br>(d) If applicable, explain how loss to follow-up was addressed<br>(e) Describe any sensitivity analyses | 8<br>8<br>N/A<br>N/A<br>N/A |
| <b>Results</b>            |         |                                                                                                                                                                                                                                                                                                                        |                             |
| Participants              | 13*     | (a) Report numbers of individuals at each stage of study—eg numbers potentially eligible, examined for eligibility, confirmed eligible, included in the study, completing follow-up, and analysed<br>(b) Give reasons for non-participation at each stage<br>(c) Consider use of a flow diagram                        | 9<br>N/A<br>N/A             |
| Descriptive data          | 14*     | (a) Give characteristics of study participants (eg demographic, clinical, social) and information on exposures and potential confounders<br>(b) Indicate number of participants with missing data for each variable of interest<br>(c) Summarise follow-up time (eg, average and total amount)                         | 9<br>N/A<br>11              |
| Outcome data              | 15*     | Report numbers of outcome events or summary measures over time                                                                                                                                                                                                                                                         | 9, 11                       |

|    |                          |    |                                                                                                                                                                                                              |       |
|----|--------------------------|----|--------------------------------------------------------------------------------------------------------------------------------------------------------------------------------------------------------------|-------|
| 1  | Main results             | 16 | (a) Give unadjusted estimates and, if applicable, confounder-adjusted estimates and their precision (eg, 95% confidence interval). Make clear which confounders were adjusted for and why they were included | 9-13  |
| 2  |                          |    | (b) Report category boundaries when continuous variables were categorized                                                                                                                                    | 7     |
| 3  |                          |    | (c) If relevant, consider translating estimates of relative risk into absolute risk for a meaningful time period                                                                                             | N/A   |
| 4  |                          |    |                                                                                                                                                                                                              |       |
| 5  |                          |    |                                                                                                                                                                                                              |       |
| 6  |                          |    |                                                                                                                                                                                                              |       |
| 7  |                          |    |                                                                                                                                                                                                              |       |
| 8  |                          |    |                                                                                                                                                                                                              |       |
| 9  | Other analyses           | 17 | Report other analyses done—eg analyses of subgroups and interactions, and sensitivity analyses                                                                                                               | N/A   |
| 10 |                          |    |                                                                                                                                                                                                              |       |
| 11 | <b>Discussion</b>        |    |                                                                                                                                                                                                              |       |
| 12 |                          |    |                                                                                                                                                                                                              |       |
| 13 | Key results              | 18 | Summarise key results with reference to study objectives                                                                                                                                                     | 13    |
| 14 | Limitations              | 19 | Discuss limitations of the study, taking into account sources of potential bias or imprecision. Discuss both direction and magnitude of any potential bias                                                   | 15-16 |
| 15 |                          |    |                                                                                                                                                                                                              |       |
| 16 | Interpretation           | 20 | Give a cautious overall interpretation of results considering objectives, limitations, multiplicity of analyses, results from similar studies, and other relevant evidence                                   | 13-16 |
| 17 |                          |    |                                                                                                                                                                                                              |       |
| 18 |                          |    |                                                                                                                                                                                                              |       |
| 19 | Generalisability         | 21 | Discuss the generalisability (external validity) of the study results                                                                                                                                        | 15-16 |
| 20 |                          |    |                                                                                                                                                                                                              |       |
| 21 | <b>Other information</b> |    |                                                                                                                                                                                                              |       |
| 22 |                          |    |                                                                                                                                                                                                              |       |
| 23 | Funding                  | 22 | Give the source of funding and the role of the funders for the present study and, if applicable, for the original study on which the present article is based                                                | 18    |
| 24 |                          |    |                                                                                                                                                                                                              |       |
| 25 |                          |    |                                                                                                                                                                                                              |       |

26 \*Give information separately for exposed and unexposed groups.

27  
28  
29 **Note:** An Explanation and Elaboration article discusses each checklist item and gives methodological background and published examples of transparent reporting. The STROBE checklist is best used in conjunction with this article (freely available on the Web sites of PLoS Medicine at <http://www.plosmedicine.org/>, Annals of Internal Medicine at <http://www.annals.org/>, and Epidemiology at <http://www.epidem.com/>). Information on the STROBE Initiative is available at <http://www.strobe-statement.org>.

30  
31  
32  
33  
34  
35  
36  
37  
38  
39  
40  
41  
42  
43  
44  
45  
46  
47  
48  
49  
50  
51  
52  
53  
54  
55  
56  
57  
58  
59  
60

# BMJ Open

## Frailty degree and illness trajectories in older people towards the end-of-life: a prospective observational study

|                                 |                                                                                                                                                                                                                                                                                                                                                                                                                                                                                                                                                                                                                                                                                                                                                                                                                                                                                                                                                                                                                                                                                                                                                                                                                                                                                                                                                                                                                                                                                                                                                                                                                                                                                                                                                                                                                                                                          |
|---------------------------------|--------------------------------------------------------------------------------------------------------------------------------------------------------------------------------------------------------------------------------------------------------------------------------------------------------------------------------------------------------------------------------------------------------------------------------------------------------------------------------------------------------------------------------------------------------------------------------------------------------------------------------------------------------------------------------------------------------------------------------------------------------------------------------------------------------------------------------------------------------------------------------------------------------------------------------------------------------------------------------------------------------------------------------------------------------------------------------------------------------------------------------------------------------------------------------------------------------------------------------------------------------------------------------------------------------------------------------------------------------------------------------------------------------------------------------------------------------------------------------------------------------------------------------------------------------------------------------------------------------------------------------------------------------------------------------------------------------------------------------------------------------------------------------------------------------------------------------------------------------------------------|
| Journal:                        | <i>BMJ Open</i>                                                                                                                                                                                                                                                                                                                                                                                                                                                                                                                                                                                                                                                                                                                                                                                                                                                                                                                                                                                                                                                                                                                                                                                                                                                                                                                                                                                                                                                                                                                                                                                                                                                                                                                                                                                                                                                          |
| Manuscript ID                   | bmjopen-2020-042645.R2                                                                                                                                                                                                                                                                                                                                                                                                                                                                                                                                                                                                                                                                                                                                                                                                                                                                                                                                                                                                                                                                                                                                                                                                                                                                                                                                                                                                                                                                                                                                                                                                                                                                                                                                                                                                                                                   |
| Article Type:                   | Original research                                                                                                                                                                                                                                                                                                                                                                                                                                                                                                                                                                                                                                                                                                                                                                                                                                                                                                                                                                                                                                                                                                                                                                                                                                                                                                                                                                                                                                                                                                                                                                                                                                                                                                                                                                                                                                                        |
| Date Submitted by the Author:   | 11-Feb-2021                                                                                                                                                                                                                                                                                                                                                                                                                                                                                                                                                                                                                                                                                                                                                                                                                                                                                                                                                                                                                                                                                                                                                                                                                                                                                                                                                                                                                                                                                                                                                                                                                                                                                                                                                                                                                                                              |
| Complete List of Authors:       | <p>Amblàs-Novellas, Jordi; Hospital General de Vic, ; Universitat de Vic - Universitat Central de Catalunya,</p> <p>Murray, Scott; The University of Edinburgh, Primary Palliative Care Research Group, The Usher Institute of Population Health Sciences and Informatics</p> <p>Torné, Anna; Universitat de Vic - Universitat Central de Catalunya, Central Catalonia Chronicity Research Group (C3RG), Centre for Health and Social Care Research (CESS); Hospital General de Vic, Geriatric and Palliative Care Department</p> <p>Martori, Joan Carles; Universitat de Vic - Universitat Central de Catalunya, Data Analysis and Modeling Research Group</p> <p>Moine, Sébastien ; The University of Edinburgh, Primary Palliative Care Research Group, The Usher Institute of Population Health Sciences and Informatics</p> <p>Oller, Ramon; Universitat de Vic - Universitat Central de Catalunya, Data Analysis and Modelling Research Group. Department of Economics and Business</p> <p>Latorre, Nadina; Universitat de Vic - Universitat Central de Catalunya, Central Catalonia Chronicity Research Group (C3RG), Centre for Health and Social Care Research (CESS); Hospital General de Vic, Geriatric and Palliative Care Department</p> <p>Espauella, Joan; Universitat de Vic - Universitat Central de Catalunya, Central Catalonia Chronicity Research Group (C3RG), Centre for Health and Social Care Research (CESS); Hospital Universitari de Vic, Geriatric and Palliative Care Department</p> <p>Santaeugènia, Sebastià; Badalona Serveis Assistencials SA, Department of Geriatric Medicine and Palliative Care; Universitat de Vic - Universitat Central de Catalunya, Chronicity Research Group (C3RG), Centre for Health and Social Care Research (CESS)</p> <p>Gómez-Batiste, Xavier; University of Vic - Central University of Catalonia,</p> |
| <b>Primary Subject Heading</b>: | Palliative care                                                                                                                                                                                                                                                                                                                                                                                                                                                                                                                                                                                                                                                                                                                                                                                                                                                                                                                                                                                                                                                                                                                                                                                                                                                                                                                                                                                                                                                                                                                                                                                                                                                                                                                                                                                                                                                          |
| Secondary Subject Heading:      | Geriatric medicine, Palliative care                                                                                                                                                                                                                                                                                                                                                                                                                                                                                                                                                                                                                                                                                                                                                                                                                                                                                                                                                                                                                                                                                                                                                                                                                                                                                                                                                                                                                                                                                                                                                                                                                                                                                                                                                                                                                                      |
| Keywords:                       | GERIATRIC MEDICINE, Adult palliative care < PALLIATIVE CARE, Quality in health care < HEALTH SERVICES ADMINISTRATION & MANAGEMENT                                                                                                                                                                                                                                                                                                                                                                                                                                                                                                                                                                                                                                                                                                                                                                                                                                                                                                                                                                                                                                                                                                                                                                                                                                                                                                                                                                                                                                                                                                                                                                                                                                                                                                                                        |
|                                 |                                                                                                                                                                                                                                                                                                                                                                                                                                                                                                                                                                                                                                                                                                                                                                                                                                                                                                                                                                                                                                                                                                                                                                                                                                                                                                                                                                                                                                                                                                                                                                                                                                                                                                                                                                                                                                                                          |

1  
2  
3  
4  
5  
6  
7  
8  
9  
10  
11  
12  
13  
14  
15  
16  
17  
18  
19  
20  
21  
22  
23  
24  
25  
26  
27  
28  
29  
30  
31  
32  
33  
34  
35  
36  
37  
38  
39  
40  
41  
42  
43  
44  
45  
46  
47  
48  
49  
50  
51  
52  
53  
54  
55  
56  
57  
58  
59  
60

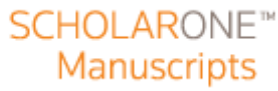



I, the Submitting Author has the right to grant and does grant on behalf of all authors of the Work (as defined in the below author licence), an exclusive licence and/or a non-exclusive licence for contributions from authors who are: i) UK Crown employees; ii) where BMJ has agreed a CC-BY licence shall apply, and/or iii) in accordance with the terms applicable for US Federal Government officers or employees acting as part of their official duties; on a worldwide, perpetual, irrevocable, royalty-free basis to BMJ Publishing Group Ltd ("BMJ") its licensees and where the relevant Journal is co-owned by BMJ to the co-owners of the Journal, to publish the Work in this journal and any other BMJ products and to exploit all rights, as set out in our [licence](#).

The Submitting Author accepts and understands that any supply made under these terms is made by BMJ to the Submitting Author unless you are acting as an employee on behalf of your employer or a postgraduate student of an affiliated institution which is paying any applicable article publishing charge ("APC") for Open Access articles. Where the Submitting Author wishes to make the Work available on an Open Access basis (and intends to pay the relevant APC), the terms of reuse of such Open Access shall be governed by a Creative Commons licence – details of these licences and which [Creative Commons](#) licence will apply to this Work are set out in our licence referred to above.

Other than as permitted in any relevant BMJ Author's Self Archiving Policies, I confirm this Work has not been accepted for publication elsewhere, is not being considered for publication elsewhere and does not duplicate material already published. I confirm all authors consent to publication of this Work and authorise the granting of this licence.

# Frailty Degree and Illness Trajectories in Older People towards the End-of-life: a Prospective Observational Study

## Authors

Jordi Amblàs-Novellas<sup>1,2,3,4</sup>, Scott A. Murray<sup>5</sup>, Anna Torné<sup>1,3</sup>, Joan Carles Martori<sup>6</sup>, Sébastien Moine<sup>5</sup>, Ramon Oller<sup>6</sup>, Nadina Latorre<sup>1,3</sup>, Joan Espauella<sup>1,2,3</sup>, Sebastià Santauegènia<sup>1,4</sup>, Xavier Gómez-Batiste<sup>1,2</sup>

## Affiliations

1. Central Catalonia Chronicity Research Group (C3RG), Centre for Health and Social Care Research (CESS), University of Vic/Central University of Catalonia (UVIC-UCC). Vic, Barcelona, Spain.
2. Chair and Department of Palliative Care, University of Vic/Central University of Catalonia (UVIC-UCC). Vic, Barcelona, Spain
3. Geriatric and Palliative Care Department, Hospital Universitari de la Santa Creu and Hospital Universitari de Vic. Vic, Barcelona, Spain
4. Chronic Care Program, Ministry of Health, Generalitat de Catalunya, Catalonia, Spain
5. Primary Palliative Care Research Group, The Usher Institute of Population Health Sciences and Informatics, The University of Edinburgh, UK
6. Data Analysis and Modeling Research Group. Department of Economics and Business, University of Vic/Central University of Catalonia (UVIC-UCC). Vic, Barcelona, Spain

1  
2  
3 **Corresponding autor:** Jordi Amblàs-Novellas. Central Catalonia Chronicity Research  
4  
5 Group (C3RG), Centre for Health and Social Care Research (CESS), Universitat de Vic.  
6  
7 University of Vic/Central University of Catalonia (UVIC-UCC). Rambla Hospital 52,  
8  
9  
10 08500 Vic, Barcelona. Spain.

11  
12 Email: [jordiamblas@gmail.com](mailto:jordiamblas@gmail.com)  
13  
14  
15  
16  
17  
18  
19  
20  
21  
22  
23  
24  
25  
26  
27  
28  
29  
30  
31  
32  
33  
34  
35  
36  
37  
38  
39  
40  
41  
42  
43  
44  
45  
46  
47  
48  
49  
50  
51  
52  
53  
54  
55  
56  
57  
58  
59  
60

## Abstract

**Objectives:** To assess the degree of frailty in older people with different advanced diseases and its relationship with end-of-life illness trajectories and survival.

**Methods:** Prospective, observational study, including all patients admitted to the Acute Geriatric Unit of the University Hospital of Vic (Barcelona, Spain) during 12 consecutive months (2014 – 2015). The Frail-VIG index, based on 22 questions assessing 25 deficits, was used to quantify frailty degree, and participants with palliative care needs were identified using the NECPAL tool. Participants were classified according to their Frail-VIG index scores into 4 groups (i.e., no frailty, mild frailty, moderate frailty, and advanced frailty) and their dominant illness trajectory and followed for up to 2 years. The relationship between frailty degree and survival was evaluated using the C-statistics. Survival curves were plotted using the Kaplan-Meier estimator and compared using the log-rank test, and a Cox proportional hazards model with the interaction between frailty degree and illness trajectories was calculated.

**Results:** Of the 590 persons with a mean (SD) age of 86.4 (5.6) years recruited, 260 (44.1%) were identified as end-of-life people (EOLp), distributed into cancer (n=31, 11.9%), organ failure (n=79, 30.4%), dementia (n=86, 33.1%), and multimorbidity (n=64, 24.6%) categories. All 260 EOLp had some degree of frailty, mostly advanced frailty (n=184, 70.8%), regardless of the illness trajectory, and 220 (84.6%) died within two years. Survival curves differed between frailty degrees ( $p<0.0001$ ) and revealed different patterns of survival decline in the different end-of-life trajectories. Cox regression analyses showed that each additional deficit was associated with a 61.5%, 30.1%, 29.6% and 12.9% increased risk of death in people with dementia, organ failure, multimorbidity and cancer, respectively, ( $p<0.01$  for all the coefficients).



1  
2  
3 **Conclusions:** All older people towards the end-of-life in this study were frail, mostly  
4 with advanced frailty. The degree of frailty is related to survival across the different  
5 illness trajectories despite the differing survival patterns among trajectories. Frailty  
6 indexes may be useful to assess end-of-life older people, regardless of their trajectory.  
7  
8  
9  
10  
11  
12  
13

14 **Keywords:** Frailty, palliative care, mortality, multimorbidity, longitudinal study  
15  
16  
17

## 18 **Strengths and Limitations of this Study**

19  
20  
21  
22

- 23 • To our knowledge, this is the first study that evaluated the degree of frailty using a  
24 frailty index in older patients with different advanced illness trajectories.  
25
- 26 • This is a real-life study, using tools routinely applied in the Acute Geriatric Unit  
27 conducting this study: the NECPAL, to identify people with palliative care needs,  
28 and the Frail-VIG index, to measure the degree of frailty and personalization of the  
29 interventions.  
30
- 31 • In this context, assessing frailty degree may contribute to establish a common  
32 language between geriatric and palliative knowledge, with the goal of providing a  
33 better care for older people with palliative care needs, specially those in the first end-  
34 of-life transition.  
35
- 36 • The use of a single computer system collecting the mortality status reported by all  
37 health providers prevented loss of patients and missing data, increasing the accuracy  
38 of the results.  
39
- 40 • The results from this study were obtained in a very old population and the frail VIG  
41 index lacks sufficient external validation, potentially limiting their generalizability  
42 and raising the need for further studies in younger populations.  
43  
44  
45  
46  
47  
48  
49  
50  
51  
52  
53  
54  
55  
56  
57  
58  
59  
60

## INTRODUCTION

The model of care for patients with advanced chronic conditions is currently shifting towards a new paradigm, characterized by early identification of persons with any disease or chronic condition who would benefit from palliative care [1,2]—this corresponds to the first transition in palliative care. Despite the benefits of this early identification,[3]the increasing number of people with palliative care needs, together with their high heterogeneity regarding age, needs, diseases, and chronic illnesses, poses novel challenges for early identification and assessment of these patients.[4,5] Indeed, the progression towards the end of life is conditioned by multiple variables and is strictly individual: not all people age in the same way nor reach the final situation with the same circumstances or needs.[6]

In the context of this new paradigm of “early palliative care”, some authors have pointed to frailty as a crucial concept for persons needing palliative care —particularly older people with multimorbidity—, their caregivers, and healthcare professionals, to learn to manage the uncertainty and complexity of these end-of-life situations.[7–9] Given the relationship between mortality and frailty,[10] the concept of frailty has been proposed as a criterion useful in the three key steps ensuring good palliative care,[5,6,11,12] including 1) early identification of persons in end-of-life situation (particularly in cases of advanced frailty); 2) multidimensional assessment and situational diagnosis; and 3) drafting an advanced care plan and sharing decision-making.

Regardless of the proposed uses of frailty as an indicator, palliative care and geriatrics have traditionally used this concept, albeit with different perspectives.[8] In the setting of palliative care, frailty has equated to the third end-of-life trajectory and defined as the gradual decline in physical function, typically associated with dementia.[13,14] In contrast, from the geriatric perspective, frailty is rather a multidimensional clinical entity

1  
2  
3 defined as a vulnerability state against stressing factors due to limited compensatory  
4 mechanisms.[15] Of the multiple instruments developed to assess frailty, frailty indexes  
5 (i.e., the ratio between accumulated deficits in a given person and the total possible  
6 deficits) may have utility in identifying people with frailty for end-of-life care across all  
7 disease groups.[8,16]

8  
9  
10  
11  
12  
13  
14 A better understanding of how to provide the best palliative care for frail older people has  
15 become an international priority[17] and, considering the increased difficulty of  
16 identifying dying people in very old age (>85 years),[18–20] the concept of frailty is  
17 increasingly acknowledged as a cornerstone in the assessment and care of persons in an  
18 end-of-life situation and needing palliative care.[15,21] However, a consensus on how to  
19 use the concept of frailty to provide palliative care to end-of-life people (EOLp) remains  
20 to be established.[15,22,23] In this study, aimed at improving the care of end-of-life older  
21 people, we assessed the degree of frailty in a geriatric cohort with different advanced  
22 diseases and its relationship with end-of-life illness trajectories and survival.

## 33 34 35 36 **METHODS**

### 37 38 39 40 41 **Study Design and Participants**

42  
43 This was a prospective, observational study, including all patients admitted to the Acute  
44 Geriatric unit (AGU) at the University Hospital of Vic (Barcelona, Spain) during 12  
45 consecutive months (January 2014 – January 2015). The University Hospital of Vic is a  
46 200-bed acute care hospital covering a population area of 156,000 inhabitants. Admission  
47 criteria to the AGU, which were the criteria for inclusion in this study, were age  $\geq$  85  
48 years, cognitive decline, and/or end-of-life situation; no exclusion criteria were defined.  
49 The methods, including study design, variables, data sources, and study size have been  
50 described in a previous study.[24] Of the patients included in this study (i.e., those  
51  
52  
53  
54  
55  
56  
57  
58  
59  
60

1  
2  
3 admitted to the AGU), those identified as non end-of-life were included in a control group  
4  
5 of patients aged  $\geq 85$  years and/or with cognitive decline. The results of this subanalysis  
6  
7 are reported according to the Strengthening the Reporting of Observational Studies in  
8  
9 Epidemiology (STROBE) recommendations.[25] All patients and family relatives of  
10  
11 patients with advanced dementia situation ( $GDS \geq 6$ ) signed the written informed consent  
12  
13 for participation before any data was recorded. The study protocol was approved by the  
14  
15 Ethics Committee of the University Hospital of Vic (2,014,850 PR80); this study was  
16  
17 conducted in accordance with the Helsinki Declaration and the local Personal Data  
18  
19 Protection Law (LOPD 15/1999).  
20  
21  
22  
23  
24

## 25 **Patient and Public Involvement**

26  
27 This research was done without patient involvement. Patients were not invited to  
28  
29 comment on the study design and were not consulted to develop patient relevant outcomes  
30  
31 or interpret the results. Patients were not invited to contribute to the writing or editing of  
32  
33 this document for readability or accuracy.  
34  
35  
36  
37  
38

## 39 **Variables and Data Sources**

40  
41 Frailty was assessed using the Frail-VIG index, a tool consisting in 22 questions to assess  
42  
43 25 deficits commonly associated with age and adverse health outcomes, based on the  
44  
45 cumulative deficit model of frailty. Fifteen of the 22 questions refer to chronic  
46  
47 conditions, including geriatric conditions and syndromes. The Frail-VIG index is a  
48  
49 continuous variable ranging from 0 to 1 and classified into 4 groups: no frailty (Frail-VIG  
50  
51 index score  $<0.2$ ), mild frailty (Frail-VIG index score  $0.2-0.35$ ), moderate frailty (Frail-  
52  
53 VIG index score  $0.36-0.5$ ), and advanced frailty (Frail-VIG index score  $>0.5$ ). In addition  
54  
55 to its predictive value, previous studies have shown the content, construct, criteria, and  
56  
57 convergent-divergent construct validity of the Frail-VIG index [24,26–28]. EOLp were  
58  
59  
60

1  
2  
3 identified using the NECPAL tool, a validated tool for the early identification of the need  
4 for palliative care among individuals with limited life expectancy.[29–31] EOLp were  
5 classified into the 3 archetypal end-of-life trajectories according to the severity and/or  
6 progression criteria for their main underlying disease: cancer, organ failure (including  
7 chronic pulmonary disease, chronic heart disease, serious chronic liver disease, and  
8 serious chronic renal disease), and dementia (including other chronic neurological  
9 diseases). People with palliative care needs without a predominant advanced disease were  
10 identified as "multimorbidity" group or trajectory, since all had 2 or more underlying  
11 chronic conditions.  
12  
13  
14  
15  
16  
17  
18  
19  
20  
21  
22

23 After inclusion of the last patient in the study (i.e., last admitted patient in the AGU before  
24 January 15th, 2015) and before starting data analysis in 2017, patients were followed for  
25 up to 24 months (2015 - beginning 2017). Information regarding the patient status after  
26 the 24-month follow-up period was obtained from the Shared Medical Record in  
27 Catalonia (HC3), a sole electronic database accessible to all healthcare providers in  
28 Catalonia that allows healthcare professionals to reliably determine whether a patient is  
29 "active" (alive) or deceased (including date of death).[32]  
30  
31  
32  
33  
34  
35  
36  
37  
38  
39  
40

## 41 **Statistical Analysis**

42  
43 Qualitative variables were presented as frequencies and percentages, whereas quantitative  
44 variables were presented as the mean and the standard deviation (SD). Qualitative  
45 variables were compared using the Pearson's chi-squared test. In the complete cohort, the  
46 concordance between frailty degree and survival was evaluated using the C-statistics and  
47 the Kaplan-Meier estimator was used to plot survival curves, which were compared using  
48 the log-rank test. In the group of people identified as end-of-life, survival curves for each  
49 illness trajectory were plotted using the Kaplan-Meier estimator and were compared using  
50 the log-rank test, and a Cox proportional hazards model with the interaction between  
51  
52  
53  
54  
55  
56  
57  
58  
59  
60

1  
2  
3 frailty degree and illness trajectories was calculated. The assumption of proportional  
4 hazards was checked using the Schoenfeld residuals and a goodness-of-fit test. The ROC  
5 curves were used to assess the ability of the Frail-VIG index to predict survival at one  
6 and two years by measuring their area under the receiver-operating curve (AUC) for the  
7 different illness trajectories. The significance level for all analyses was set at a two-sided  
8  $\alpha=0.05$ . The descriptive statistics analysis of the variables was performed using the SPSS  
9 software program (IBM; Chicago, IL; USA), and the survival analysis was performed  
10 using the *survival* and *pROC* packages from the R project (<https://www.r-project.org>).  
11  
12  
13  
14  
15  
16  
17  
18  
19  
20  
21

## 22 RESULTS

### 23 Patient Characteristics and End-of-life Status

24  
25  
26  
27 The study included 590 patients with a mean (SD, range) age of 86.4 (5.6, 48-105) years,  
28 of whom 339 (57.5%) were women. Based on the Frail-VIG index scores, 543 (92%)  
29 patients showed some degree of frailty, with 111 (18.8%), 207 (35.1%), and 225 (38.1%)  
30 patients showing mild, moderate and advanced frailty, respectively. Of the 590 patients  
31 included, 53 (8.9%) died during hospitalization, and 330 (55.9%) and 260 (44.1%) were  
32 identified as non-EOLp) and EOLp, respectively. Of the 260 EOLp, 31 (11.9%), 79  
33 (30.4%), 86 (33.1%), and 64 (24.6%) were classified in cancer, organ failure, dementia,  
34 and multimorbidity illness trajectories, respectively.  
35  
36  
37  
38  
39  
40  
41  
42  
43  
44  
45  
46  
47  
48  
49

### 50 Relationship between End-of-life Status and Patient Characteristics

51  
52 EOLp and non-EOLp had similar mean age and sex frequencies, but differed in the  
53 distribution among the 4 frailty groups: all EOLp (260) and 283 (85.8%) of the 330 non-  
54 EOLp were frail to some extent, with 252 (96.9%) and 180 (54.5%) showing moderate  
55 or advanced frailty in the EOLp and non-EOLp group, respectively. Table 1 summarizes  
56  
57  
58  
59  
60

the frequencies of EOLp and non-EOLp across the various frailty categories and their main demographic characteristics.

**Table 1.** Classification of study patients according to the Frail-VIG index scores, demographic characteristics, and end-of-life status (n=590)

|          | Demographic characteristics |                  | Frailty Degree, n (%) |              |                  |                  |
|----------|-----------------------------|------------------|-----------------------|--------------|------------------|------------------|
|          | Age (years), mean (SD)      | Sex (% of women) | Not frail             | Mild Frailty | Moderate Frailty | Advanced Frailty |
| EOLp     | 86.3 (5.8)                  | 54.6             | 0 (0)                 | 8 (3.1)      | 68 (26.1)        | 184 (70.8)       |
| Non-EOLp | 86.5 (5.4)                  | 59.7             | 47 (14.3)             | 103 (31.2)   | 139 (42.1)       | 41 (12.4)        |

EOLp: End-of-life people, Non-EOLp: Non End-of-life people; SD, standard deviation

Correspondingly, median Frail-VIG index scores were significantly higher in EOLp compared to non-EOLp: 0.56 and 0.36, respectively ( $p < 0.001$ ). In EOLp, the predominant frailty degree was persistently advanced for all end-of-life trajectory categories: cancer, organ failure, dementia, and multimorbidity (range 68-75%) (Table 2). All EOLp in the multimorbidity trajectory (n=64) were classified in the moderate and advanced frailty groups.

**Table 2.** Classification of end-of-life people according to demographic characteristics, Frail-VIG index scores and end-of-life trajectory (n=260), n (%)

|               | Demographic characteristics |                  | Frailty degree, n (%) |              |                  |                  | Total     |
|---------------|-----------------------------|------------------|-----------------------|--------------|------------------|------------------|-----------|
|               | Age (years), mean (SD)      | Sex (% of women) | Not frail             | Mild Frailty | Moderate Frailty | Advanced Frailty |           |
| Cancer        | 85.7 (5.4)                  | 45.2             | 0 (0)                 | 3 (9.7)      | 7 (22.6)         | 21 (67.7)        | 31 (11.9) |
| Organ Failure | 86.9 (5.3)                  | 46.8             | 0 (0)                 | 4 (5.1)      | 20 (25.3)        | 55 (69.6)        | 79 (30.4) |

|                |            |      |       |         |           |            |           |
|----------------|------------|------|-------|---------|-----------|------------|-----------|
| Dementia       | 85.4 (5.3) | 65.1 | 0 (0) | 1 (1.1) | 25 (29.1) | 60 (69.8)  | 86 (33.1) |
| Multimorbidity | 86.9 (7.3) | 54.7 | 0 (0) | 0 (0)   | 16 (25.0) | 48 (75.0)  | 64 (24.6) |
| Total          | N/A        | N/A  | 0 (0) | 8 (3.1) | 68 (26.1) | 184 (70.8) | 260       |

N/A, not applicable; SD, standard deviation

### Relationship between Frailty Degree and Survival

Of the complete cohort (EOLp and non-EOLp), 338 (57.3%) study patients died during the 2-year follow-up period. Mortality was significantly higher in EOLp than in non-EOLp: 220 (84.6%) and 118 (35.7%), respectively ( $p < 0.001$ ). The log-rank test comparing the survival curves of each frailty degree revealed significant differences in the overall population ( $X^2 = 423, p < 0.0001$ ), EOLp ( $X^2 = 69.9, p < 0.0001$ ), and non-EOLp ( $X^2 = 122, p < 0.0001$ ) (Figure 1). Correspondingly, the C coefficient for concordance between the survival time and the Frail-VIG score was 0.8, indicating that higher scores of the Frail-VIG index are associated with lower survival.

### Relationship between Frailty Degree and Survival in End-of-Life People

The frequencies of death at the end of the 2-year follow-up period for each trajectory in EOLp are presented in Table 3. Survival curves, plotted using the Kaplan-Meier model for each frailty category (i.e., mild, intermediate, and advanced), differed among the different end-of-life trajectories, revealing different patterns of survival decline according to the frailty degree (Figure 2). A Cox regression model with the interaction between Frail-VIG index and illness trajectories revealed that the effect of the frailty degree on survival was associated with illness trajectories ( $p < 0.01$  for all the coefficients), even though the influence of illness trajectory progressively decreased as the frailty degree increased (Figure 3). The proportional hazard assumption was supported by the Schoenfeld residuals ( $p > 0.1$  for both global and each covariate tests). The estimated



hazard ratios for each additional deficit (i.e., a 0.04 increase in the Frail-VIG index) were 1.61 for people with dementia (95% CI=1.43-1.81), 1.30 for people with organ failure (95% CI=1.18-1.43), 1.30 for people with multimorbidity (95% CI=1.18-1.42), and 1.13 for people with cancer (95% CI=1.02-1.25). These results show that for each additional deficit (i.e., 0.04 increase in the Frail-VIG index) the risk of death increased by 61.5%, 30.1%, 29.6% and 12.9% in people with dementia, organ failure, multimorbidity and cancer, respectively.

**Table 3.** Status of end-of-life people according to the Frail-VIG index scores and end-of-life trajectory after the 2-year follow-up (n=260), n (%)

|                | n  | Status | Mild Frailty | Moderate Frailty | Advanced Frailty | Total     |
|----------------|----|--------|--------------|------------------|------------------|-----------|
| Cancer         | 31 | Dead   | 2 (6.5)      | 7 (22.6)         | 21 (67.7)        | 30 (96.8) |
|                |    | Alive  | 1 (3.2)      | 0 (0)            | 0 (0)            | 1 (3.2)   |
| Organ Failure  | 79 | Dead   | 2 (2.5)      | 16 (20.2)        | 54 (68.4)        | 72 (91.1) |
|                |    | Alive  | 2 (2.5)      | 4 (5.1)          | 1 (1.3)          | 7 (8.9)   |
| Dementia       | 86 | Dead   | 1 (1.2)      | 6 (6.9)          | 55 (64.0)        | 62 (72.1) |
|                |    | Alive  | 0 (0)        | 19 (22.1)        | 5 (5.8)          | 24 (27.9) |
| Multimorbidity | 64 | Dead   | 0 (0)        | 8 (12.5)         | 48 (75.0)        | 56 (87.5) |
|                |    | Alive  | 0 (0)        | 8 (12.5)         | 0 (0)            | 8 (12.5)  |

The ROC analysis of the Frail-VIG index for the EOLp showed an AUC of 0.87 (95% CI:0.83-0.92) after one year and 0.87 (95% CI:0.84-0.92) after two years of follow-up. Of the 184 EOLp with advanced frailty (Frail-VIG index score > 0.5), 178 (96.7%) had died at two years of follow-up. The AUC differed among each of the four end-of-life trajectories: cancer (1 and 0.93), organ failure (0.86 and 0.90), dementia (0.92 and 0.92) and multimorbidity (0.91 and 0.94), after one and two years of follow-up, respectively.

1  
2  
3 Despite these differences, the AUC remained high irrespective of the illness trajectory.  
4  
5 Regarding the sensitivity and specificity of the Frail-VIG index as prognosis factor of  
6  
7 mortality, the most sensitive and specific cut-off was 0.5 at both one and two years after  
8  
9 follow-up, showing a sensitivity of 0.81 and 0.85 and a specificity of 0.83 and 0.81,  
10  
11 respectively.  
12  
13

## 14 15 **DISCUSSION**

16  
17  
18 In this prospective, observational study including 590 patients admitted at an Acute  
19  
20 Geriatric unit (AGU), we found that all older patients were frail towards the end of life  
21  
22 (the prevalence of moderate-to-advanced frailty was 97% among people within an end-  
23  
24 of-life trajectory and 55% outside it). Furthermore, advanced frailty was the predominant  
25  
26 frailty category (ranged 68 to 75%) for all end-of-life trajectories: cancer, organ failure,  
27  
28 dementia, and multimorbidity. Overall, the Frail-VIG index had a high capacity to predict  
29  
30 death at one and two years (AUC 0.87), albeit to a different extent for the end-of-life  
31  
32 categories cancer, organ failure, dementia and multimorbidity (AUC was always >0.86  
33  
34 for mortality at either one or two years). This finding confirms the hypothesis that the  
35  
36 degree of frailty is related to prognosis regardless of the illness trajectory.  
37  
38

39  
40  
41 The characteristics and outcomes of the cohort assessed in this study, which included all  
42  
43 patients admitted to an Acute Geriatric unit (AGU), were similar to those previously  
44  
45 reported. All the persons assessed in this study had a Frail-VIG index score <0.8, similar  
46  
47 to previous studies showing that the theoretical maximum score is 0.7. According to these  
48  
49 studies, the accumulation of 2/3 of all possible deficits (Frailty index score >0.7) results  
50  
51 in death due to the person's inability to overcome more deficits, a phenomenon defined  
52  
53 as system failure.[33,34] Likewise, similar to previous studies in other populations, the  
54  
55 mortality rate at 1 to 2 years in our cohort was nearly 100% for the EOLp with frailty  
56  
57 index score >0.5.[34,35]  
58  
59  
60

1  
2  
3 Furthermore, we provide evidence showing that the degree of frailty significantly  
4 influenced survival irrespective of the advanced illness and end-of-life trajectory. In spite  
5 of this general influence, the survival curves according to the frailty degree followed  
6 different patterns for the four end-of-life trajectories, enabling the description of different  
7 frailty or deficit accumulation end-of-life trajectories according to the main disease,  
8 specially in the absence of advanced frailty. As the frailty degree increased, differences  
9 between trajectories decreased, resulting in a trend towards a compression of survival  
10 curves in advanced frailty situations where mortality is very high irrespective of the main  
11 advanced illness and end-of-life trajectory. Thus, in EOLp with cancer, mortality rates  
12 were high regardless of the frailty degree (moderate or advanced), leading to the  
13 hypothesis, similar to recent studies, that cancer patients have a catastrophic accumulation  
14 of deficits.[36] In contrast, EOLp with dementia showed different mortality rates  
15 according to their frailty degree and died progressively, likely due to the natural history  
16 of the disease, suggesting a slower accumulation of deficits. People with multimorbidity  
17 and advanced frailty shows a survival profile similar to people with cancer, while those  
18 with moderate frailty have a survival rate more similar to people with dementia. Finally,  
19 persons with an organ disease would accumulate deficits in episodes, even though  
20 prospective studies with serial frailty indexes would be required to test this hypothesis.

21  
22  
23  
24  
25  
26  
27  
28  
29  
30  
31  
32  
33  
34  
35  
36  
37  
38  
39  
40  
41  
42  
43  
44  
45 In this regard, similar to recent studies describing different trajectories according to the  
46 evolution of the social, spiritual or psychological situation of EOLp,[3] prospective  
47 studies following the degree of frailty using electronic frailty indexes have described three  
48 different trajectories (i.e., rapidly rising frailty, moderately increasing frailty, and stable  
49 frailty).[36] Even though more studies would be required to describe different end-of-life  
50 frailty trajectories, the fact that each end-of-life trajectory resulted in different mortality  
51 curves supports a dynamic view of EOLp.  
52  
53  
54  
55  
56  
57  
58  
59  
60

1  
2  
3 The traditional association of frailty to the “third end-of-life trajectory” (i.e., dementia)  
4 [13,14] has probably been influenced by the lack of specific prognostic instruments for  
5 persons in this trajectory, unlike those in the cancer [37,38] or organ disease [39,40]  
6 trajectories. Our results regarding the high prevalence of frailty in all end-of-life  
7 trajectories support the validity of the concept that frailty may be present in all trajectories  
8 beyond the dementia trajectory. In addition to expanding the concept of frailty, our study  
9 underscores the need to consider a further development of the end-of-life trajectories. Of  
10 the 260 people who were identified as people in end-of-life situation, 24.6% did not have  
11 severity criteria for a single disease, although all of them had at least 2 chronic conditions.  
12 The identification of this cluster of people with advanced frailty and multimorbidity can  
13 help provide them early palliative care, and the benefits derived from it.[41,42]

14 Frailty Indices based on a Comprehensive Geriatric Assessment, such as the Frail-VIG  
15 index, may help professionals address one of the current challenges in palliative care  
16 [18,19,43]: the identification, assessment, and management of older people (i.e., aged  
17 >80 years) with palliative care needs [20,44]. First, assessment and quantification of  
18 frailty degree, which is suitable to synthesize the results of a multidimensional evaluation,  
19 can be useful to validate the identification of people in an end-of-life situation;[12]  
20 secondly, due to its ability to discriminate between different degrees of severity, frailty  
21 indexes can be very useful to healthcare professionals for the situational diagnosis of the  
22 first and second end-of-life transition,[6,12] and monitorization of EOLp  
23 evolution;[45,46] and finally, quantification of frailty would enable palliative care  
24 customization [47,48] and engage people, caregivers and healthcare professionals in  
25 sharing decision-making and advance care planning.

26 The results of this study should be interpreted in the context of some limitations,  
27 particularly regarding the generalizability of the results. Firstly, the recruitment strategy  
28

1  
2  
3 based on an AGU solely enriched our study sample with older patients, likely precluding  
4 the applicability of these study results to younger patients. Secondly, the analysis of  
5 EOLp frailty across the various end-of-life trajectory categories importantly reduced the  
6 number of patients in each group, thus limiting the statistical power of these analyses.  
7  
8 However, despite the reduced number of patients in some groups, our analysis yielded  
9 statistically significant results. In spite of its limitations, to our knowledge, this study is  
10 the first to evaluate the degree of frailty using a frailty index in very old patients identified  
11 as EOLp. Frailty was evaluated in a cohort of geriatric patients, including EOLp and non-  
12 EOLp, and the data for this study was collected during routine geriatric assessment, as  
13 opposed to previous studies that used electronic health record data to evaluate the degree  
14 of frailty.[49] Moreover, the single computer information system of Catalonia (HC3) that  
15 collects the medical records and mortality status of all patients reported by all health  
16 providers prevented loss of patients up to follow-up.[32] Consequently, the lack of  
17 missing data due to the HC3 system, along with the use of standard and validated tools to  
18 identify EOLp (NECPAL) and to measure frailty (Frail-VIG index) increased the  
19 accuracy of the results obtained from this study. The early identification of people  
20 needing palliative care and the more accurate definition of the various end-of-life  
21 trajectories opened the door to a novel perspective of palliative care.[50] In this regard,  
22 the use of frailty as an overarching concept in the assessment of all people in an end-of-  
23 life situation —at least of those with a multimorbid profile— might contribute to go one  
24 step further in this novel approach to palliative care.  
25  
26  
27  
28  
29  
30  
31  
32  
33  
34  
35  
36  
37  
38  
39  
40  
41  
42  
43  
44  
45  
46  
47  
48  
49  
50  
51

## 52 CONCLUSIONS

53  
54  
55 Our results showed that all end-of-life people were frail (mostly with advanced frailty)  
56 irrespective of the end-of-life trajectory. Their degree of frailty, measured using the Frail-  
57 VIG index, influenced mortality. This indicates a close relationship between frailty, end-  
58  
59  
60

1  
2  
3 of-life status, and mortality for all people who die. Measuring frailty using a frailty index  
4  
5 could be useful in routine practice for healthcare professionals to understand the  
6  
7 heterogeneous nature of people needing palliative care and tailor their care to the patient's  
8  
9 needs. The survival pattern of people with multimorbidity could support the description  
10  
11 of a composite illness trajectory for this patient group.  
12  
13  
14  
15  
16  
17

## 18 **DECLARATIONS**

### 21 **Ethics Approval and Consent to Participate**

22  
23 All patients and family relatives of patients with advanced dementia situation ( $GDS \geq 6$ )  
24  
25 signed the written informed consent for participation before any data was recorded. The  
26  
27 study protocol was approved by the Ethics Committee of the University Hospital of Vic  
28  
29 (2,014,850 PR80). This study was conducted in accordance with the Helsinki Declaration  
30  
31 and the local Personal Data Protection Law (LOPD 15/1999).  
32  
33  
34  
35  
36  
37

### 38 **Consent for publication**

39  
40 Not applicable.  
41  
42  
43

### 44 **Data Sharing**

45  
46 The anonymized datasets analyzed during the current study are available from the  
47  
48 corresponding author on reasonable request.  
49  
50  
51

### 52 **Competing interests**

53  
54 The authors declare no conflict of interest.  
55  
56  
57  
58  
59  
60

## Funding

This study was funded by the Instituto de Salud Carlos III (ISCIII) 17/02240 grant

## Author's contributions

JAN, AT, JCM, and XGB were responsible for the conception and design of the study. JAN coordinated and substantially contributed to the data collection. JCM and RO performed the statistical analysis. All authors (JAN, SAM, AT, JCM, SM, RO, NL, JE, SS and XGB) were involved in interpretation of data. JAN wrote the initial draft of the manuscript and all the other authors (SAM, AT, JCM, SM, RO, NL, JE, SS and XGB) critically revised the manuscript. All authors (JAN, SAM, AT, JCM, SM, RO, NL, JE, SS and XGB) have provided approval for the final version of the manuscript submitted for publication and agree to be accountable for all aspects of the work.

## Acknowledgements

The authors would like to acknowledge i2e3 Biomedical Research Institute for providing medical writing assistance.

## REFERENCES

- 1 Boyd K, Murray SSA. Recognising and managing key transitions in end of life care. *BMJ* 2010;**341**:c4863. doi:10.1136/bmj.c4863
- 2 Gomez-Batiste X, Martinez-Munoz M, Blay C, *et al.* Identifying patients with chronic conditions in need of palliative care in the general population: development of the NECPAL tool and preliminary prevalence rates in Catalonia. *BMJ Support Palliat Care* 2013;**3**:300–8. doi:10.1136/bmjspcare-2012-000211
- 3 Murray SA, Kendall M, Mitchell G, *et al.* Palliative care from diagnosis to death. *BMJ* 2017;**356**:j878. doi:10.1136/bmj.j878

- 1  
2  
3 4 Kimbell B, Murray SA, Macpherson S BK. Embracing inherent uncertainty in  
4 advanced illness. *BMJ Br Med J* 2016;**354**:i3802.  
5  
6  
7  
8 5 Gómez-Batiste X, Blay C, Broggi MA, *et al.* Ethical Challenges of Early  
9 Identification of Advanced Chronic Patients in Need of Palliative Care. *J Palliat*  
10 *Care* 2018;**33**:247–51. doi:10.1177/0825859718788933  
11  
12  
13  
14 6 Amblàs-Novellas J, Espauella J, Rexach L *et al*, *et al.* Frailty, severity,  
15 progression and shared decision-making: A pragmatic framework for the challenge  
16 of clinical complexity at the end of life. *Eur Geriatr Med* 2015;**6**:189–194.  
17 doi:10.1016/j.eurger.2015.01.002  
18  
19  
20  
21  
22  
23 7 Cardona-Morrell M, Lewis E, Suman S, *et al.* Recognising older frail patients near  
24 the end of life: What next? *Eur J Intern Med* 2017;**45**:84–90.  
25 doi:10.1016/j.ejim.2017.09.026  
26  
27  
28  
29  
30 8 Koller K, Rockwood K. Frailty in older adults: Implications for end-of-life care.  
31 *Cleve Clin J Med* 2013;**80**:168–74. doi:10.3949/ccjm.80a.12100  
32  
33  
34  
35 9 Stow D, Spiers G, Matthews FE, *et al.* What is the evidence that people with frailty  
36 have needs for palliative care at the end of life? A systematic review and narrative  
37 synthesis. *Palliat Med* 2019;**33**:399–414. doi:10.1177/0269216319828650  
38  
39  
40  
41  
42 10 Mousa A, Savva GM, Mitnitski A, *et al.* Is frailty a stable predictor of mortality  
43 across time? Evidence from the Cognitive Function and Ageing Studies. *Age*  
44 *Ageing* 2018;**47**:721–7. doi:10.1093/ageing/afy077  
45  
46  
47  
48  
49 11 Pialoux T, Goyard J, Hermet R. When frailty should mean palliative care. *J Nurs*  
50 *Educ Pract* 2013;**3**:75–84. doi:10.5430/jnep.v3n7p75  
51  
52  
53  
54 12 Pollack LR, Goldstein NE, Gonzalez WC, *et al.* The Frailty Phenotype and  
55 Palliative Care Needs In Older Survivors of Critical Illness Lauren. *J Am Geriatr*  
56 *Soc* 2018;**65**:1168–75. doi:10.1111/jgs.14799.The  
57  
58  
59  
60



- 1  
2  
3 13 Lunney JR, Lynn J, Foley DJ, *et al.* Patterns of functional decline at the end of life.  
4  
5 *JAMA* 2003;**289**:2387–92. doi:10.1001/jama.289.18.2387  
6  
7  
8 14 Murray S a, Boyd K, Sheikh A. Palliative care in chronic illness. *BMJ*  
9  
10 2005;**330**:611–2. doi:10.1136/bmj.330.7492.611  
11  
12 15 Rodríguez-Mañas L, Féart C, Mann G, *et al.* Searching for an operational  
13 definition of frailty: A delphi method based consensus statement. the frailty  
14 operative definition-consensus conference project. *Journals Gerontol - Ser A Biol*  
15 *Sci Med Sci* 2013;**68**:62–7. doi:10.1093/gerona/gls119  
16  
17  
18  
19  
20 21 Cesari M, Gambassi G, van Kan GA, *et al.* The frailty phenotype and the frailty  
22 index: different instruments for different purposes. *Age Ageing* 2014;**43**:10–2.  
23 doi:10.1093/ageing/aft160  
24  
25  
26  
27 28 Bone AE, Morgan M, Maddocks M, *et al.* Developing a model of short-term  
29 integrated palliative and supportive care for frail older people in community  
30 settings: perspectives of older people, carers and other key stakeholders. *Age*  
31 *Ageing* 2016;**45**:863–73. doi:10.1093/ageing/afw124  
32  
33  
34  
35  
36 37 Moriarity J, Rutter D, Ross PD, *et al.* End of life care for people with dementia  
38 living in care homes. 2012;:4p.  
39  
40  
41 42 Dixon J, King D, Matosevic T, *et al.* Equity in the provision of palliative care in  
43 the UK: Review of evidence. 2015;:145.  
44  
45  
46 47 Teggi D. Unexpected death in ill old age: An analysis of disadvantaged dying in  
48 the English old population. *Soc Sci Med* 2018;**217**:112–20.  
49 doi:10.1016/j.socscimed.2018.09.048  
50  
51  
52 53 Cesari M, Prince M, Thiyagarajan JA, *et al.* Frailty: An Emerging Public Health  
54 Priority. *J Am Med Dir Assoc* 2016;**17**:188–92. doi:10.1016/j.jamda.2015.12.016  
55  
56  
57 58 Moorhouse P, Rockwood K, Morley JE, *et al.* Frailty Consensus: A Call to Action.  
59  
60

- 1  
2  
3 *J Am Med Dir Assoc* 2013;**14**:392–7.  
4  
5 doi:<http://dx.doi.org/10.1016/j.jamda.2013.03.022>  
6  
7  
8 23 British Geriatrics Society. End of Life Care in Frailty: Identification and  
9 prognostication | British Geriatrics Society.  
10 [https://www.bgs.org.uk/resources/end-of-life-care-in-frailty-identification-and-](https://www.bgs.org.uk/resources/end-of-life-care-in-frailty-identification-and-prognostication)  
11 [prognostication](https://www.bgs.org.uk/resources/end-of-life-care-in-frailty-identification-and-prognostication) (accessed 29 Nov 2020).  
12  
13  
14  
15  
16  
17 24 Amblàs-Novellas J, Martori JC, Espauella J, *et al.* Frail-VIG index: a concise  
18 frailty evaluation tool for rapid geriatric assessment. *BMC Geriatr* 2018;**18**:29.  
19 doi:[10.1186/s12877-018-0718-2](https://doi.org/10.1186/s12877-018-0718-2)  
20  
21  
22  
23  
24 25 von Elm E, Altman DG, Egger M, *et al.* The Strengthening the Reporting of  
25 Observational Studies in Epidemiology (STROBE) statement: guidelines for  
26 reporting observational studies. *Lancet* 2007;**370**:1453–7. doi:[10.1016/S0140-](https://doi.org/10.1016/S0140-6736(07)61602-X)  
27 [6736\(07\)61602-X](https://doi.org/10.1016/S0140-6736(07)61602-X)  
28  
29  
30  
31  
32  
33 26 Amblàs-Novellas J, Martori JC, Molist Brunet N, *et al.* Frail-VIG index: Design  
34 and evaluation of a new frailty index based on the Comprehensive Geriatric  
35 Assessment. *Rev Esp Geriatr Gerontol* 2017;**52**:119–27.  
36 doi:[10.1016/j.regg.2016.09.003](https://doi.org/10.1016/j.regg.2016.09.003)  
37  
38  
39  
40  
41  
42 27 Moreno-Ariño M, Torrente Jiménez I, Cartanya Gutiérrez A, *et al.* Assessing the  
43 strengths and weaknesses of the Clinical Frailty Scale through correlation with a  
44 frailty index. *Aging Clin Exp Res* 2020;**32**:2225–32. doi:[10.1007/s40520-019-](https://doi.org/10.1007/s40520-019-01450-w)  
45 [01450-w](https://doi.org/10.1007/s40520-019-01450-w)  
46  
47  
48  
49  
50  
51 28 Madruga-Flores M, Gómez-del Río R, Delgado-Domínguez L, *et al.* Capacidad  
52 predictiva de fragilidad basal y fuerza de prensión al ingreso en resultados al alta  
53 en una unidad geriátrica de recuperación funcional. *Rev Esp Geriatr Gerontol*  
54  
55  
56  
57  
58  
59  
60

- 1  
2  
3 29 Gómez-Batiste X, Martínez-Muñoz M, Blay C, *et al.* Prevalence and  
4 characteristics of patients with advanced chronic conditions in need of palliative  
5 care in the general population: A cross-sectional study. *Palliat Med* 2014;**28**:302–  
6 11. doi:10.1177/0269216313518266  
7  
8  
9  
10  
11  
12 30 Gómez-Batiste X, Turrillas P, Tebé C, *et al.* NECPAL tool prognostication in  
13 advanced chronic illness: A rapid review and expert consensus. *BMJ Support*  
14 *Palliat Care* Published Online First: 2020. doi:10.1136/bmjspcare-2019-002126  
15  
16  
17  
18  
19 31 CENTRAL CATALONIA CHRONICITY RESEARCH GROUP. Utility of  
20 NECPAL. <https://en.c3rg.com/necpal> (accessed 29 Nov 2020).  
21  
22  
23  
24 32 Solans O, Gallego C, Garcia-Cuyas F, *et al.* Shared Medical Record, Personal  
25 Health Folder and Health and Social Integrated Care in Catalonia. In: *New*  
26 *Perspectives in Medical Records*. Springer, Cham 2017. 49–64. doi:10.1007/978-  
27 3-319-28661-7\_4  
28  
29  
30  
31  
32  
33 33 Rockwood K, Mitnitski A. Frailty Defined by Deficit Accumulation and Geriatric  
34 Medicine Defined by Frailty. *Clin. Geriatr. Med.* 2011;**27**:17–26.  
35 doi:10.1016/j.cger.2010.08.008  
36  
37  
38  
39  
40 34 Rockwood K, Mitnitski A. Limits to deficit accumulation in elderly people. *Mech*  
41 *Age Dev* 2006;**127**:494–6. doi:10.1016/j.mad.2006.01.002  
42  
43  
44  
45 35 Rockwood K, Rockwood MRH, Mitnitski A. Physiological redundancy in older  
46 adults in relation to the change with age in the slope of a frailty index. *J Am Geriatr*  
47 *Soc* 2010;**58**:318–23. doi:10.1111/j.1532-5415.2009.02667.x  
48  
49  
50  
51 36 Stow D, Matthews FE, Hanratty B. Frailty trajectories to identify end of life: A  
52 longitudinal population-based study. *BMC Med* 2018;**16**:1–7.  
53 doi:10.1186/s12916-018-1148-x  
54  
55  
56  
57  
58 37 Evans C, McCarthy M. Prognostic uncertainty in terminal care: can the Karnofsky  
59  
60

- 1  
2  
3 index help? *Lancet (London, England)* 1985;1:1204–6. doi:10.1016/s0140-  
4  
5 6736(85)92876-4  
6  
7  
8 38 Anderson F, Downing GM, Hill J, *et al.* Palliative Performance Scale (PPS): A  
9  
10 new tool. *J Palliat Care* 1996;12:5–11.  
11  
12 39 van Dijk WD, van den Bemt L, van den Haak-Rongen S, *et al.* Multidimensional  
13  
14 prognostic indices for use in COPD patient care. A systematic review. *Respir. Res.*  
15  
16 2011;12:151. doi:10.1186/1465-9921-12-151  
17  
18  
19 40 Walter LC, Brand RJ, Counsell SR, *et al.* Development and validation of a  
20  
21 prognostic index for 1-year mortality in older adults after hospitalization. *JAMA*  
22  
23 2001;285:2987–94. doi:10.1001/jama.285.23.2987  
24  
25  
26 41 Moine S, Murray SA, Boyd K, *et al.* Palliative care and the endless cycle of serious  
27  
28 health-related suffering. *Lancet.* 2018;392:471–2. doi:10.1016/S0140-  
29  
30 6736(18)31195-4  
31  
32  
33 42 Aldridge MD, Bradley EH. Epidemiology and patterns of care at the end of life:  
34  
35 Rising complexity, shifts in care patterns and sites of death. *Health Aff*  
36  
37 2017;36:1175–83. doi:10.1377/hlthaff.2017.0182  
38  
39  
40 43 (NCPC) NC for PC. National Council for Palliative Care ( NCPC ) Briefing The  
41  
42 Government ' s National Commitment For End Of Life Care. 2016.  
43  
44 44 PA C, GE G, DA R, *et al.* Prediction of appropriate timing of palliative care for  
45  
46 older adults with non-malignant life-threatening disease: a systematic review. *Age*  
47  
48 *Ageing* 2005;34. doi:10.1093/AGEING/AFI054  
49  
50  
51 45 Gill TM, Gahbauer E a, Allore HG, *et al.* Transitions between frailty states among  
52  
53 community-living older persons. *Arch Intern Med* 2006;166:418–23.  
54  
55 doi:10.1001/archinte.166.4.418  
56  
57  
58 46 Liu ZY, Wei YZ, Wei LQ, *et al.* Frailty transitions and types of death in Chinese  
59  
60

- 1  
2  
3 older adults: A population-based cohort study. *Clin Interv Aging* 2018;**13**:947–56.  
4  
5 doi:10.2147/CIA.S157089  
6  
7  
8 47 The Picker Institute. *Patient - Centered Care 2015 : Scenarios , Vision , Goals &*  
9  
10 *Next Steps*. 2004.  
11  
12 48 Cohen-Mansfield J, Skornick-Bouchbinder M, Brill S. Trajectories of End of Life:  
13  
14 A Systematic Review. *Journals Gerontol - Ser B Psychol Sci Soc Sci* 2018;**73**:564–  
15  
16 72. doi:10.1093/geronb/gbx093  
17  
18  
19 49 Clegg A, Bates C, Young J, *et al*. Development and validation of an electronic  
20  
21 frailty index using routine primary care electronic health record data. *Age Ageing*  
22  
23 2016;**45**:353–60. doi:10.1093/ageing/afw039  
24  
25  
26 50 Amblàs-Novellas J, Murray SA, Espauella J, *et al*. Identifying patients with  
27  
28 advanced chronic conditions for a progressive palliative care approach: a cross-  
29  
30 sectional study of prognostic indicators related to end-of-life trajectories. *BMJ*  
31  
32 *Open* 2016;**6**:e012340. doi:10.1136/bmjopen-2016-012340  
33  
34  
35  
36  
37  
38  
39  
40  
41  
42  
43  
44  
45  
46  
47  
48  
49  
50  
51  
52  
53  
54  
55  
56  
57  
58  
59  
60

## FIGURE LEGENDS

**Figure 1.** Survival according to the degree of frailty in (A) the total study patients, (B) end-of-life people, and (C) Non End-of-life people.

**Figure 2.** Survival according to the degree of frailty and end-of-life trajectory: (A) cancer, (B) organ failure, (C) dementia, and (D) Multimorbidity.

**Figure 3.** Survival probability of end-of-life people in the different illness trajectories according to Frail-VIG index value: Frail-VIG index 0.44 (15th percentile) (A), Frail-VIG index 0.56 (median) (B) and Frail-VIG index 0.68 (90th percentile) (C).

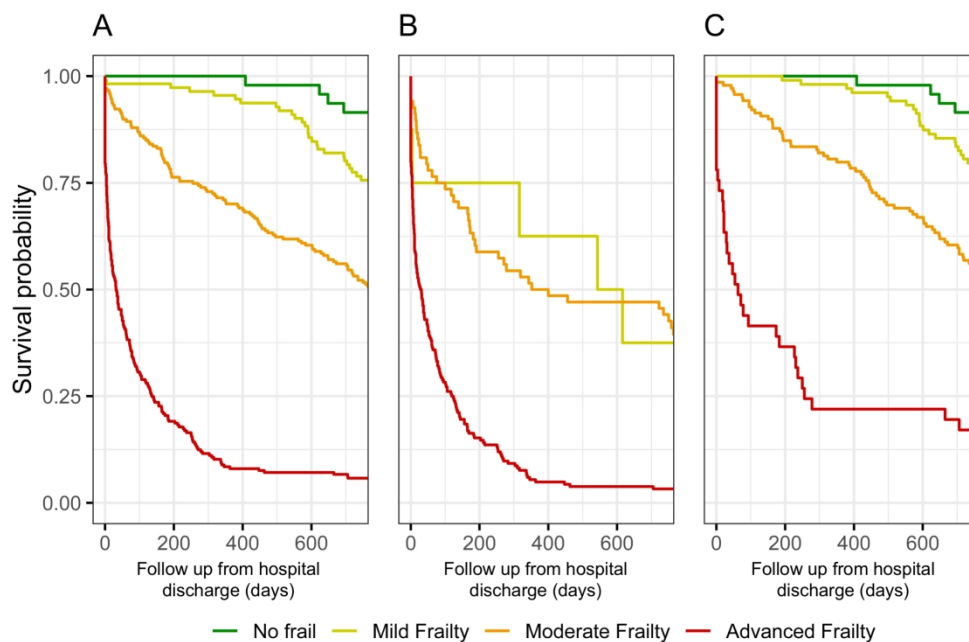

Figure 1. Survival according to the degree of frailty in (A) the total study patients, (B) end-of-life people, and (C) Non End-of-life people.

860x556mm (72 x 72 DPI)

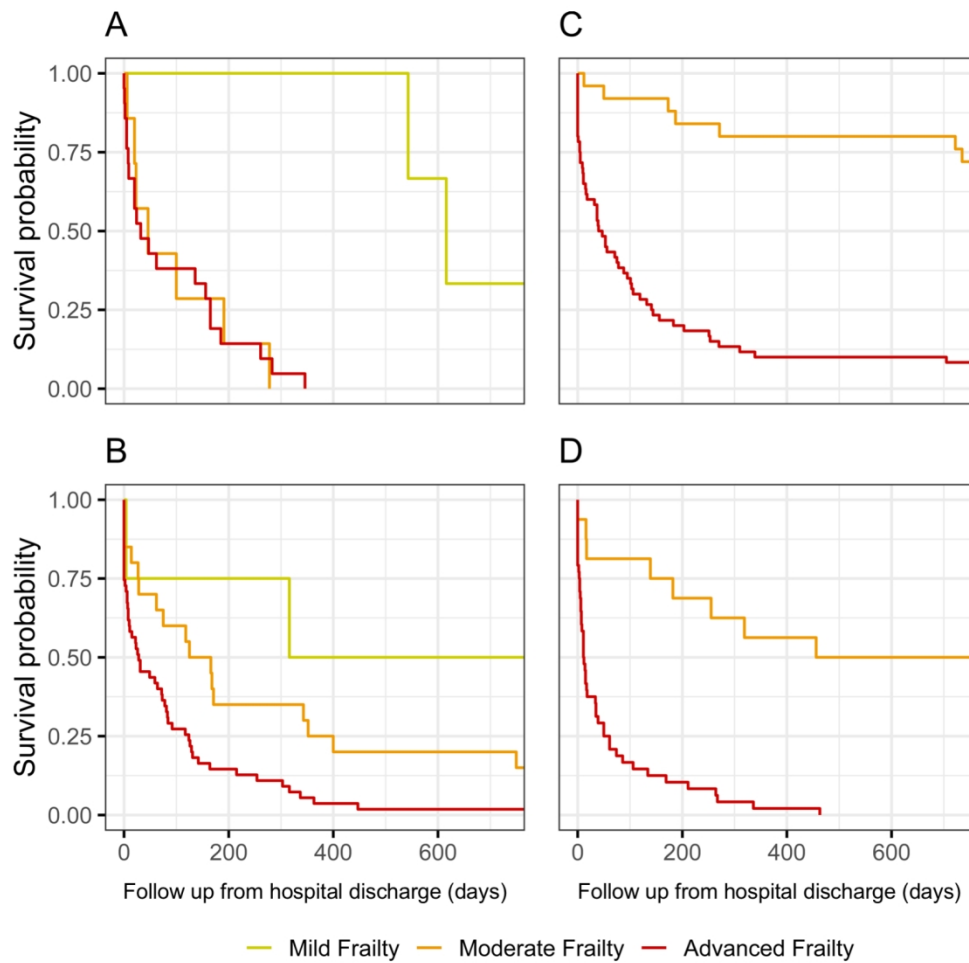

Figure 2. Survival according to the degree of frailty and end-of-life trajectory: (A) cancer, (B) organ failure, (C) dementia, and (D) Multimorbidity.

616x593mm (72 x 72 DPI)



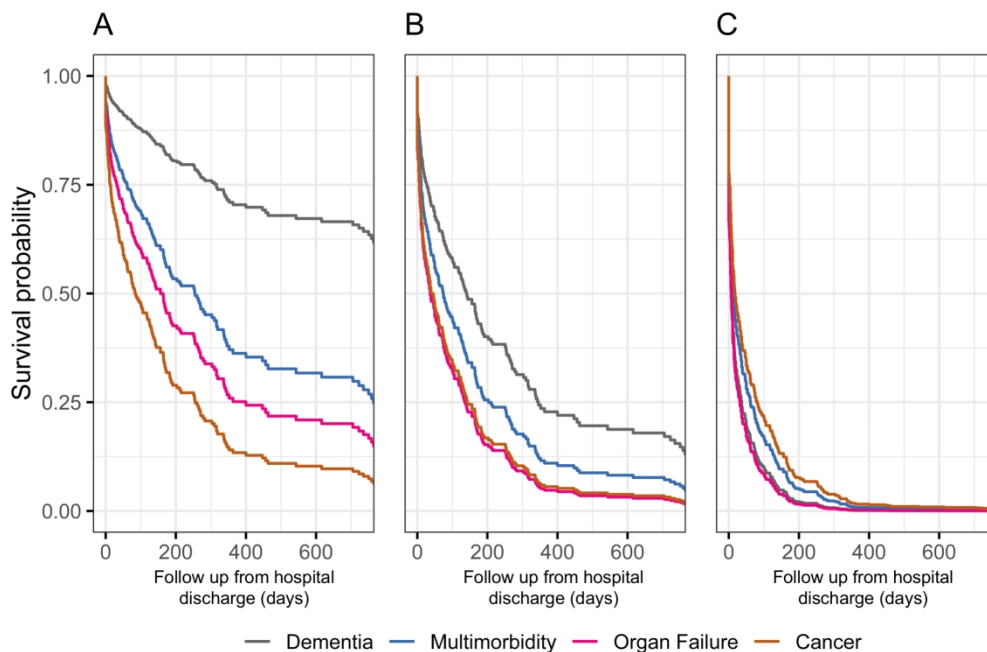

Figure 3. Survival probability of end-of-life people in the different illness trajectories according to Frail-VIG index value: Frail-VIG index 0.44 (15th percentile) (A), Frail-VIG index 0.56 (median) (B) and Frail-VIG index 0.68 (90th percentile) (C).

874x564mm (72 x 72 DPI)

STROBE Statement—Checklist of items that should be included in reports of *cohort studies*

|                              | Item No | Recommendation                                                                                                                                                                                                                                                                                                         | Page No                     |
|------------------------------|---------|------------------------------------------------------------------------------------------------------------------------------------------------------------------------------------------------------------------------------------------------------------------------------------------------------------------------|-----------------------------|
| <b>Title and abstract</b>    | 1       | (a) Indicate the study's design with a commonly used term in the title or the abstract<br>(b) Provide in the abstract an informative and balanced summary of what was done and what was found                                                                                                                          | 1, 3<br>3, 4                |
| <b>Introduction</b>          |         |                                                                                                                                                                                                                                                                                                                        |                             |
| Background/rationale         | 2       | Explain the scientific background and rationale for the investigation being reported                                                                                                                                                                                                                                   | 5-6                         |
| Objectives                   | 3       | State specific objectives, including any prespecified hypotheses                                                                                                                                                                                                                                                       | 6                           |
| <b>Methods</b>               |         |                                                                                                                                                                                                                                                                                                                        |                             |
| Study design                 | 4       | Present key elements of study design early in the paper                                                                                                                                                                                                                                                                | 6                           |
| Setting                      | 5       | Describe the setting, locations, and relevant dates, including periods of recruitment, exposure, follow-up, and data collection                                                                                                                                                                                        | 6                           |
| Participants                 | 6       | (a) Give the eligibility criteria, and the sources and methods of selection of participants. Describe methods of follow-up<br>(b) For matched studies, give matching criteria and number of exposed and unexposed                                                                                                      | 6, 8<br>N/A                 |
| Variables                    | 7       | Clearly define all outcomes, exposures, predictors, potential confounders, and effect modifiers. Give diagnostic criteria, if applicable                                                                                                                                                                               | 7                           |
| Data sources/<br>measurement | 8*      | For each variable of interest, give sources of data and details of methods of assessment (measurement). Describe comparability of assessment methods if there is more than one group                                                                                                                                   | 7                           |
| Bias                         | 9       | Describe any efforts to address potential sources of bias                                                                                                                                                                                                                                                              | N/A                         |
| Study size                   | 10      | Explain how the study size was arrived at                                                                                                                                                                                                                                                                              | 6                           |
| Quantitative variables       | 11      | Explain how quantitative variables were handled in the analyses. If applicable, describe which groupings were chosen and why                                                                                                                                                                                           | 8                           |
| Statistical methods          | 12      | (a) Describe all statistical methods, including those used to control for confounding<br>(b) Describe any methods used to examine subgroups and interactions<br>(c) Explain how missing data were addressed<br>(d) If applicable, explain how loss to follow-up was addressed<br>(e) Describe any sensitivity analyses | 8<br>8<br>N/A<br>N/A<br>N/A |
| <b>Results</b>               |         |                                                                                                                                                                                                                                                                                                                        |                             |
| Participants                 | 13*     | (a) Report numbers of individuals at each stage of study—eg numbers potentially eligible, examined for eligibility, confirmed eligible, included in the study, completing follow-up, and analysed<br>(b) Give reasons for non-participation at each stage<br>(c) Consider use of a flow diagram                        | 9<br>N/A<br>N/A             |
| Descriptive data             | 14*     | (a) Give characteristics of study participants (eg demographic, clinical, social) and information on exposures and potential confounders<br>(b) Indicate number of participants with missing data for each variable of interest<br>(c) Summarise follow-up time (eg, average and total amount)                         | 9<br>N/A<br>11              |
| Outcome data                 | 15*     | Report numbers of outcome events or summary measures over time                                                                                                                                                                                                                                                         | 9, 11                       |

|    |                          |    |                                                                                                                                                                                                              |       |
|----|--------------------------|----|--------------------------------------------------------------------------------------------------------------------------------------------------------------------------------------------------------------|-------|
| 1  | Main results             | 16 | (a) Give unadjusted estimates and, if applicable, confounder-adjusted estimates and their precision (eg, 95% confidence interval). Make clear which confounders were adjusted for and why they were included | 9-13  |
| 2  |                          |    | (b) Report category boundaries when continuous variables were categorized                                                                                                                                    | 7     |
| 3  |                          |    | (c) If relevant, consider translating estimates of relative risk into absolute risk for a meaningful time period                                                                                             | N/A   |
| 4  |                          |    |                                                                                                                                                                                                              |       |
| 5  |                          |    |                                                                                                                                                                                                              |       |
| 6  |                          |    |                                                                                                                                                                                                              |       |
| 7  |                          |    |                                                                                                                                                                                                              |       |
| 8  |                          |    |                                                                                                                                                                                                              |       |
| 9  | Other analyses           | 17 | Report other analyses done—eg analyses of subgroups and interactions, and sensitivity analyses                                                                                                               | N/A   |
| 10 |                          |    |                                                                                                                                                                                                              |       |
| 11 | <b>Discussion</b>        |    |                                                                                                                                                                                                              |       |
| 12 |                          |    |                                                                                                                                                                                                              |       |
| 13 | Key results              | 18 | Summarise key results with reference to study objectives                                                                                                                                                     | 13    |
| 14 | Limitations              | 19 | Discuss limitations of the study, taking into account sources of potential bias or imprecision. Discuss both direction and magnitude of any potential bias                                                   | 15-16 |
| 15 |                          |    |                                                                                                                                                                                                              |       |
| 16 | Interpretation           | 20 | Give a cautious overall interpretation of results considering objectives, limitations, multiplicity of analyses, results from similar studies, and other relevant evidence                                   | 13-16 |
| 17 |                          |    |                                                                                                                                                                                                              |       |
| 18 |                          |    |                                                                                                                                                                                                              |       |
| 19 | Generalisability         | 21 | Discuss the generalisability (external validity) of the study results                                                                                                                                        | 15-16 |
| 20 |                          |    |                                                                                                                                                                                                              |       |
| 21 | <b>Other information</b> |    |                                                                                                                                                                                                              |       |
| 22 |                          |    |                                                                                                                                                                                                              |       |
| 23 | Funding                  | 22 | Give the source of funding and the role of the funders for the present study and, if applicable, for the original study on which the present article is based                                                | 18    |
| 24 |                          |    |                                                                                                                                                                                                              |       |

\*Give information separately for exposed and unexposed groups.

**Note:** An Explanation and Elaboration article discusses each checklist item and gives methodological background and published examples of transparent reporting. The STROBE checklist is best used in conjunction with this article (freely available on the Web sites of PLoS Medicine at <http://www.plosmedicine.org/>, Annals of Internal Medicine at <http://www.annals.org/>, and Epidemiology at <http://www.epidem.com/>). Information on the STROBE Initiative is available at <http://www.strobe-statement.org>.

# BMJ Open

## Frailty degree and illness trajectories in older people towards the end-of-life: a prospective observational study

|                                 |                                                                                                                                                                                                                                                                                                                                                                                                                                                                                                                                                                                                                                                                                                                                                                                                                                                                                                                                                                                                                                                                                                                                                                                                                                                                                                                                                                                                                                                                                                                                                                                                                                                                                                                                                                                                                                                                          |
|---------------------------------|--------------------------------------------------------------------------------------------------------------------------------------------------------------------------------------------------------------------------------------------------------------------------------------------------------------------------------------------------------------------------------------------------------------------------------------------------------------------------------------------------------------------------------------------------------------------------------------------------------------------------------------------------------------------------------------------------------------------------------------------------------------------------------------------------------------------------------------------------------------------------------------------------------------------------------------------------------------------------------------------------------------------------------------------------------------------------------------------------------------------------------------------------------------------------------------------------------------------------------------------------------------------------------------------------------------------------------------------------------------------------------------------------------------------------------------------------------------------------------------------------------------------------------------------------------------------------------------------------------------------------------------------------------------------------------------------------------------------------------------------------------------------------------------------------------------------------------------------------------------------------|
| Journal:                        | <i>BMJ Open</i>                                                                                                                                                                                                                                                                                                                                                                                                                                                                                                                                                                                                                                                                                                                                                                                                                                                                                                                                                                                                                                                                                                                                                                                                                                                                                                                                                                                                                                                                                                                                                                                                                                                                                                                                                                                                                                                          |
| Manuscript ID                   | bmjopen-2020-042645.R3                                                                                                                                                                                                                                                                                                                                                                                                                                                                                                                                                                                                                                                                                                                                                                                                                                                                                                                                                                                                                                                                                                                                                                                                                                                                                                                                                                                                                                                                                                                                                                                                                                                                                                                                                                                                                                                   |
| Article Type:                   | Original research                                                                                                                                                                                                                                                                                                                                                                                                                                                                                                                                                                                                                                                                                                                                                                                                                                                                                                                                                                                                                                                                                                                                                                                                                                                                                                                                                                                                                                                                                                                                                                                                                                                                                                                                                                                                                                                        |
| Date Submitted by the Author:   | 21-Mar-2021                                                                                                                                                                                                                                                                                                                                                                                                                                                                                                                                                                                                                                                                                                                                                                                                                                                                                                                                                                                                                                                                                                                                                                                                                                                                                                                                                                                                                                                                                                                                                                                                                                                                                                                                                                                                                                                              |
| Complete List of Authors:       | <p>Amblàs-Novellas, Jordi; Hospital General de Vic, ; Universitat de Vic - Universitat Central de Catalunya,</p> <p>Murray, Scott; The University of Edinburgh, Primary Palliative Care Research Group, The Usher Institute of Population Health Sciences and Informatics</p> <p>Oller, Ramon; Universitat de Vic - Universitat Central de Catalunya, Data Analysis and Modelling Research Group. Department of Economics and Business</p> <p>Torné, Anna; Universitat de Vic - Universitat Central de Catalunya, Central Catalonia Chronicity Research Group (C3RG), Centre for Health and Social Care Research (CESS); Hospital General de Vic, Geriatric and Palliative Care Department</p> <p>Martori, Joan Carles; Universitat de Vic - Universitat Central de Catalunya, Data Analysis and Modeling Research Group</p> <p>Moine, Sébastien ; The University of Edinburgh, Primary Palliative Care Research Group, The Usher Institute of Population Health Sciences and Informatics</p> <p>Latorre, Nadina; Universitat de Vic - Universitat Central de Catalunya, Central Catalonia Chronicity Research Group (C3RG), Centre for Health and Social Care Research (CESS); Hospital General de Vic, Geriatric and Palliative Care Department</p> <p>Espauella, Joan; Universitat de Vic - Universitat Central de Catalunya, Central Catalonia Chronicity Research Group (C3RG), Centre for Health and Social Care Research (CESS); Hospital Universitari de Vic, Geriatric and Palliative Care Department</p> <p>Santaeugènia, Sebastià; Badalona Serveis Assistencials SA, Department of Geriatric Medicine and Palliative Care; Universitat de Vic - Universitat Central de Catalunya, Chronicity Research Group (C3RG), Centre for Health and Social Care Research (CESS)</p> <p>Gómez-Batiste, Xavier; University of Vic - Central University of Catalonia,</p> |
| <b>Primary Subject Heading</b>: | Palliative care                                                                                                                                                                                                                                                                                                                                                                                                                                                                                                                                                                                                                                                                                                                                                                                                                                                                                                                                                                                                                                                                                                                                                                                                                                                                                                                                                                                                                                                                                                                                                                                                                                                                                                                                                                                                                                                          |
| Secondary Subject Heading:      | Geriatric medicine, Palliative care                                                                                                                                                                                                                                                                                                                                                                                                                                                                                                                                                                                                                                                                                                                                                                                                                                                                                                                                                                                                                                                                                                                                                                                                                                                                                                                                                                                                                                                                                                                                                                                                                                                                                                                                                                                                                                      |
| Keywords:                       | GERIATRIC MEDICINE, Adult palliative care < PALLIATIVE CARE, Quality in health care < HEALTH SERVICES ADMINISTRATION & MANAGEMENT                                                                                                                                                                                                                                                                                                                                                                                                                                                                                                                                                                                                                                                                                                                                                                                                                                                                                                                                                                                                                                                                                                                                                                                                                                                                                                                                                                                                                                                                                                                                                                                                                                                                                                                                        |
|                                 |                                                                                                                                                                                                                                                                                                                                                                                                                                                                                                                                                                                                                                                                                                                                                                                                                                                                                                                                                                                                                                                                                                                                                                                                                                                                                                                                                                                                                                                                                                                                                                                                                                                                                                                                                                                                                                                                          |

1  
2  
3  
4  
5  
6  
7  
8  
9  
10  
11  
12  
13  
14  
15  
16  
17  
18  
19  
20  
21  
22  
23  
24  
25  
26  
27  
28  
29  
30  
31  
32  
33  
34  
35  
36  
37  
38  
39  
40  
41  
42  
43  
44  
45  
46  
47  
48  
49  
50  
51  
52  
53  
54  
55  
56  
57  
58  
59  
60





I, the Submitting Author has the right to grant and does grant on behalf of all authors of the Work (as defined in the below author licence), an exclusive licence and/or a non-exclusive licence for contributions from authors who are: i) UK Crown employees; ii) where BMJ has agreed a CC-BY licence shall apply, and/or iii) in accordance with the terms applicable for US Federal Government officers or employees acting as part of their official duties; on a worldwide, perpetual, irrevocable, royalty-free basis to BMJ Publishing Group Ltd ("BMJ") its licensees and where the relevant Journal is co-owned by BMJ to the co-owners of the Journal, to publish the Work in this journal and any other BMJ products and to exploit all rights, as set out in our [licence](#).

The Submitting Author accepts and understands that any supply made under these terms is made by BMJ to the Submitting Author unless you are acting as an employee on behalf of your employer or a postgraduate student of an affiliated institution which is paying any applicable article publishing charge ("APC") for Open Access articles. Where the Submitting Author wishes to make the Work available on an Open Access basis (and intends to pay the relevant APC), the terms of reuse of such Open Access shall be governed by a Creative Commons licence – details of these licences and which [Creative Commons](#) licence will apply to this Work are set out in our licence referred to above.

Other than as permitted in any relevant BMJ Author's Self Archiving Policies, I confirm this Work has not been accepted for publication elsewhere, is not being considered for publication elsewhere and does not duplicate material already published. I confirm all authors consent to publication of this Work and authorise the granting of this licence.

# Frailty Degree and Illness Trajectories in Older People towards the End-of-life: a Prospective Observational Study

## Authors

Jordi Amblàs-Novellas<sup>1,2,3,4</sup>, Scott A. Murray<sup>5</sup>, Ramon Oller<sup>6</sup>, Anna Torné<sup>1,3</sup>, Joan Carles Martori<sup>6</sup>, Sébastien Moine<sup>5</sup>, Nadina Latorre<sup>1,3</sup>, Joan Espauella<sup>1,2,3</sup>, Sebastià Santauegènia<sup>1,4</sup>, Xavier Gómez-Batiste<sup>1,2</sup>

## Affiliations

1. Central Catalonia Chronicity Research Group (C3RG), Centre for Health and Social Care Research (CESS), University of Vic/Central University of Catalonia (UVIC-UCC). Vic, Barcelona, Spain.
2. Chair and Department of Palliative Care, University of Vic/Central University of Catalonia (UVIC-UCC). Vic, Barcelona, Spain
3. Geriatric and Palliative Care Department, Hospital Universitari de la Santa Creu and Hospital Universitari de Vic. Vic, Barcelona, Spain
4. Chronic Care Program, Ministry of Health, Generalitat de Catalunya, Catalonia, Spain
5. Primary Palliative Care Research Group, The Usher Institute of Population Health Sciences and Informatics, The University of Edinburgh, UK
6. Data Analysis and Modeling Research Group. Department of Economics and Business, University of Vic/Central University of Catalonia (UVIC-UCC). Vic, Barcelona, Spain

1  
2  
3 **Corresponding autor:** Jordi Amblàs-Novellas. Central Catalonia Chronicity Research  
4  
5 Group (C3RG), Centre for Health and Social Care Research (CESS), Universitat de Vic.  
6  
7 University of Vic/Central University of Catalonia (UVIC-UCC). Rambla Hospital 52,  
8  
9 08500 Vic, Barcelona. Spain.  
10

11  
12 Email: [jordiamblas@gmail.com](mailto:jordiamblas@gmail.com)  
13  
14  
15  
16  
17  
18  
19  
20  
21  
22  
23  
24  
25  
26  
27  
28  
29  
30  
31  
32  
33  
34  
35  
36  
37  
38  
39  
40  
41  
42  
43  
44  
45  
46  
47  
48  
49  
50  
51  
52  
53  
54  
55  
56  
57  
58  
59  
60

For peer review only



## Abstract

**Objectives:** To assess the degree of frailty in older people with different advanced diseases and its relationship with end-of-life illness trajectories and survival.

**Methods:** Prospective, observational study, including all patients admitted to the Acute Geriatric Unit of the University Hospital of Vic (Spain) during 12 consecutive months (2014 – 2015), followed for up to two years. Participants were identified as end-of-life people (EOLp) using the NECPAL tool and were classified according to their dominant illness trajectory. The Frail-VIG index, including 22 questions assessing 25 deficits, was used to quantify frailty degree, to calculate the relationship between frailty and mortality (ROC curves), and to assess the combined effect of frailty degree and illness trajectories on survival (Cox proportional hazards model). Survival curves were plotted using the Kaplan-Meier estimator with participants classified into 4 groups (i.e., no frailty, mild frailty, moderate frailty, and advanced frailty) and were compared using the log-rank test.

**Results:** Of the 590 persons with a mean (SD) age of 86.4 (5.6) years recruited, 260 (44.1%) were identified as EOLp, distributed into cancer (n=31, 11.9%), organ failure (n=79, 30.4%), dementia (n=86, 33.1%), and multimorbidity (n=64, 24.6%) trajectories. All 260 EOLp had some degree of frailty, mostly advanced frailty (n=184, 70.8%), regardless of the illness trajectory, and 220 (84.6%) died within two years. The area under the ROC curve (CI) after two years of follow-up for EOLp was 0.87 (0.84-0.92) with different patterns of survival decline in the different end-of-life trajectories ( $p<0.0001$ ). Cox regression analyses showed that each additional deficit of the Frail-VIG index increased the risk of death by 61.5%, 30.1%, 29.6% and 12.9% in people with dementia, organ failure, multimorbidity and cancer, respectively ( $p<0.01$  for all the coefficients).

**Conclusions:** All older people towards the end-of-life in this study were frail, mostly with advanced frailty. The degree of frailty is related to survival across the different

1  
2  
3 illness trajectories despite the differing survival patterns among trajectories. Frailty  
4  
5 indexes may be useful to assess end-of-life older people, regardless of their trajectory.  
6  
7  
8  
9

10 **Keywords:** Frailty, palliative care, mortality, multimorbidity, longitudinal study  
11  
12  
13

## 14 **Strengths and Limitations of this Study**

15  
16  
17

- 18 • To our knowledge, this is the first study that evaluated the degree of frailty using a  
19 frailty index in older patients with different advanced illness trajectories.  
20  
21
- 22 • This is a real-life study, using tools routinely applied in the Acute Geriatric Unit  
23 conducting this study: the NECPAL, to identify people with palliative care needs,  
24 and the Frail-VIG index, to measure the degree of frailty and personalization of the  
25 interventions.  
26  
27
- 28 • In this context, assessing frailty degree may contribute to establish a common  
29 language between geriatric and palliative knowledge, with the goal of providing a  
30 better care for older people with palliative care needs, specially those in the first end-  
31 of-life transition.  
32  
33
- 34 • The use of a single computer system collecting the mortality status reported by all  
35 health providers prevented loss of patients and missing data, increasing the accuracy  
36 of the results.  
37  
38
- 39 • The results from this study were obtained in a very old population and the frail VIG  
40 index lacks sufficient external validation, potentially limiting their generalizability  
41 and raising the need for further studies in younger populations.  
42  
43  
44  
45  
46  
47  
48  
49  
50  
51  
52  
53  
54  
55  
56  
57  
58  
59  
60

## INTRODUCTION

The model of care for patients with advanced chronic conditions is currently shifting towards a new paradigm, characterized by early identification of persons with any disease or chronic condition who would benefit from palliative care [1,2]—this corresponds to the first transition in palliative care. Despite the benefits of this early identification,[3]the increasing number of people with palliative care needs, together with their high heterogeneity regarding age, needs, diseases, and chronic illnesses, poses novel challenges for early identification and assessment of these patients.[4,5] Indeed, the progression towards the end of life is conditioned by multiple variables and is strictly individual: not all people age in the same way nor reach the final situation with the same circumstances or needs.[6]

In the context of this new paradigm of “early palliative care”, some authors have pointed to frailty as a crucial concept for persons needing palliative care —particularly older people with multimorbidity—, their caregivers, and healthcare professionals, to learn to manage the uncertainty and complexity of these end-of-life situations.[7–9] Given the relationship between mortality and frailty,[10] the concept of frailty has been proposed as a criterion useful in the three key steps ensuring good palliative care,[5,6,11,12] including 1) early identification of persons in end-of-life situation (particularly in cases of advanced frailty); 2) multidimensional assessment and situational diagnosis; and 3) drafting an advanced care plan and sharing decision-making.

Regardless of the proposed uses of frailty as an indicator, palliative care and geriatrics have traditionally used this concept, albeit with different perspectives.[8] In the setting of palliative care, frailty has equated to the third end-of-life trajectory and defined as the gradual decline in physical function, typically associated with dementia.[13,14] In contrast, from the geriatric perspective, frailty is rather a multidimensional clinical entity

1  
2  
3 defined as a vulnerability state against stressing factors due to limited compensatory  
4 mechanisms.[15] Of the multiple instruments developed to assess frailty, frailty indexes  
5 (i.e., the ratio between accumulated deficits in a given person and the total possible  
6 deficits) may have utility in identifying people with frailty for end-of-life care across all  
7 disease groups.[8,16]

8  
9  
10 A better understanding of how to provide the best palliative care for frail older people has  
11 become an international priority[17] and, considering the increased difficulty of  
12 identifying dying people in very old age (>85 years),[18–20] the concept of frailty is  
13 increasingly acknowledged as a cornerstone in the assessment and care of persons in an  
14 end-of-life situation and needing palliative care.[15,21] However, a consensus on how to  
15 use the concept of frailty to provide palliative care to end-of-life people (EOLp) remains  
16 to be established.[15,22,23] In this study, aimed at improving the care of end-of-life older  
17 people, we assessed the degree of frailty in a geriatric cohort with different advanced  
18 diseases and its relationship with end-of-life illness trajectories and survival.

## 35 36 **METHODS**

### 37 38 39 40 **Study Design and Participants**

41 This was a prospective, observational study, including all patients admitted to the Acute  
42 Geriatric unit (AGU) at the University Hospital of Vic (Barcelona, Spain) during 12  
43 consecutive months (January 2014 – January 2015). The University Hospital of Vic is a  
44 200-bed acute care hospital covering a population area of 156,000 inhabitants. Admission  
45 criteria to the AGU, which were the criteria for inclusion in this study, were age  $\geq$  85  
46 years, cognitive decline, and/or end-of-life situation; no exclusion criteria were defined.  
47 The methods, including study design, variables, data sources, and study size have been  
48 described in a previous study.[24] Of the patients included in this study (i.e., those  
49  
50  
51  
52  
53  
54  
55  
56  
57  
58  
59  
60

1  
2  
3 admitted to the AGU), those identified as non end-of-life were included in a control group  
4  
5 of patients aged  $\geq 85$  years and/or with cognitive decline. The results of this subanalysis  
6  
7 are reported according to the Strengthening the Reporting of Observational Studies in  
8  
9 Epidemiology (STROBE) recommendations.[25] All patients and family relatives of  
10  
11 patients with advanced dementia situation (GDS  $\geq 6$ ) signed the written informed consent  
12  
13 for participation before any data was recorded. The study protocol was approved by the  
14  
15 Ethics Committee of the University Hospital of Vic (2,014,850 PR80); this study was  
16  
17 conducted in accordance with the Helsinki Declaration and the local Personal Data  
18  
19 Protection Law (LOPD 15/1999).  
20  
21  
22  
23  
24

## 25 **Patient and Public Involvement**

26  
27 This research was done without patient involvement. Patients were not invited to  
28  
29 comment on the study design and were not consulted to develop patient relevant outcomes  
30  
31 or interpret the results. Patients were not invited to contribute to the writing or editing of  
32  
33 this document for readability or accuracy.  
34  
35  
36  
37  
38

## 39 **Variables and Data Sources**

40  
41 Frailty was assessed using the Frail-VIG index, a tool consisting in 22 questions to assess  
42  
43 25 deficits commonly associated with age and adverse health outcomes, based on the  
44  
45 cumulative deficit model of frailty. Fifteen of the 22 questions refer to chronic  
46  
47 conditions, including geriatric conditions and syndromes. The Frail-VIG index is a  
48  
49 continuous variable expressed as a score ranging from 0 to 1. To simplify the  
50  
51 representation of the survival curves, Frail-VIG index scores were expressed as a  
52  
53 categorical variable classified into 4 groups according to the degree of frailty: no frailty  
54  
55 (Frail-VIG index score  $<0.2$ ), mild frailty (Frail-VIG index score 0.2-0.35), moderate  
56  
57 frailty (Frail-VIG index score 0.36-0.5), and advanced frailty (Frail-VIG index score  
58  
59  
60

1  
2  
3 >0.5). In addition to its predictive value, previous studies have shown the content,  
4 construct, criteria, and convergent-divergent construct validity of the Frail-VIG index  
5 [24,26–28]. EOLp were identified using the NECPAL tool, a validated tool for the early  
6 identification of the need for palliative care among individuals with limited life  
7 expectancy.[29–31] EOLp were classified into the 3 archetypal end-of-life trajectories  
8 according to the severity and/or progression criteria for their main underlying disease:  
9 cancer, organ failure (including chronic pulmonary disease, chronic heart disease, serious  
10 chronic liver disease, and serious chronic renal disease), and dementia (including other  
11 chronic neurological diseases). People with palliative care needs without a predominant  
12 advanced disease were identified as "multimorbidity" group or trajectory, since all had 2  
13 or more underlying chronic conditions.

14  
15 After inclusion of the last patient in the study (i.e., last admitted patient in the AGU before  
16 January 15th, 2015) and before starting data analysis in 2017, patients were followed for  
17 up to 24 months (2015 - beginning 2017). Information regarding the patient status after  
18 the 24-month follow-up period was obtained from the Shared Medical Record in  
19 Catalonia (HC3), a sole electronic database accessible to all healthcare providers in  
20 Catalonia that allows healthcare professionals to reliably determine whether a patient is  
21 "active" (alive) or deceased (including date of death).[32]

## 22 23 24 25 26 27 28 29 30 31 32 33 34 35 36 37 38 39 40 41 42 43 44 45 46 **Statistical Analysis**

47  
48 Qualitative variables were presented as frequencies and percentages, whereas quantitative  
49 variables were presented as the mean and the standard deviation (SD). Qualitative  
50 variables were compared using the Pearson's chi-squared test. In the complete cohort, the  
51 concordance between Frail-VIG index score and survival was evaluated using the C-  
52 statistics and the Kaplan-Meier estimator was used to plot survival curves for the four  
53 frailty degree subgroups, which were compared using the log-rank test. In the group of  
54  
55  
56  
57  
58  
59  
60

1  
2  
3 people identified as end-of-life, survival curves for each illness trajectory were plotted  
4  
5 using the Kaplan-Meier estimator and were compared using the log-rank test. A Cox  
6  
7 proportional hazards model with the interaction between Frail-VIG index score and  
8  
9 illness trajectories was calculated. Details of the construction of the Cox Proportional  
10  
11 hazards model and calculation of the hazard ratios are provided in a Supplementary  
12  
13 Material file. The assumption of proportional hazards was checked using the Schoenfeld  
14  
15 residuals and a goodness-of-fit test.  
16  
17

18  
19 The ROC curves were used to assess the ability of the Frail-VIG index to predict survival  
20  
21 at one and two years by measuring their area under the receiver-operating curve (AUC)  
22  
23 for the different illness trajectories. The significance level for all analyses was set at a  
24  
25 two-sided  $\alpha=0.05$ . The descriptive statistics analysis of the variables was performed using  
26  
27 the SPSS software program (IBM; Chicago, IL; USA), and the survival analysis was  
28  
29 performed using the *survival* and *pROC* packages from the R project ([https://www.r-](https://www.r-project.org)  
30  
31 [project.org](https://www.r-project.org)).  
32  
33  
34  
35

## 36 RESULTS

### 41 Patient Characteristics and End-of-life Status

42  
43 The study included 590 patients with a mean (SD, range) age of 86.4 (5.6, 48-105) years,  
44  
45 of whom 339 (57.5%) were women. Based on the Frail-VIG index scores, 543 (92%)  
46  
47 patients showed some degree of frailty, with 111 (18.8%), 207 (35.1%), and 225 (38.1%)  
48  
49 patients showing mild, moderate and advanced frailty, respectively. Of the 590 patients  
50  
51 included, 53 (8.9%) died during hospitalization, and 330 (55.9%) and 260 (44.1%) were  
52  
53 identified as non-EOLp and EOLp, respectively. Of the 260 EOLp, 31 (11.9%), 79  
54  
55 (30.4%), 86 (33.1%), and 64 (24.6%) were classified in cancer, organ failure, dementia,  
56  
57 and multimorbidity illness trajectories, respectively.  
58  
59  
60

## Relationship between End-of-life Status and Patient Characteristics

EOLp and non-EOLp had similar mean age and sex frequencies, but differed in the distribution among the 4 frailty groups: all EOLp (260) and 283 (85.8%) of the 330 non-EOLp were frail to some extent, with 252 (96.9%) and 180 (54.5%) showing moderate or advanced frailty in the EOLp and non-EOLp group, respectively. Table 1 summarizes the frequencies of EOLp and non-EOLp across the various frailty categories and their main demographic characteristics.

**Table 1.** Classification of study patients according to the Frail-VIG index scores, demographic characteristics, and end-of-life status (n=590)

|          | Demographic characteristics   |                  | Frailty Degree, <i>n</i> (%) |              |                  |                  |
|----------|-------------------------------|------------------|------------------------------|--------------|------------------|------------------|
|          | Age (years), <i>mean (SD)</i> | Sex (% of women) | Not frail                    | Mild Frailty | Moderate Frailty | Advanced Frailty |
| EOLp     | 86.3 (5.8)                    | 54.6             | 0 (0)                        | 8 (3.1)      | 68 (26.1)        | 184 (70.8)       |
| Non-EOLp | 86.5 (5.4)                    | 59.7             | 47 (14.3)                    | 103 (31.2)   | 139 (42.1)       | 41 (12.4)        |

EOLp: End-of-life people, Non-EOLp: Non End-of-life people; SD, standard deviation

Correspondingly, median Frail-VIG index scores were significantly higher in EOLp compared to non-EOLp: 0.56 and 0.36, respectively ( $p < 0.001$ ). In EOLp, the predominant frailty degree was persistently advanced for all end-of-life trajectory categories: cancer, organ failure, dementia, and multimorbidity (range 68-75%) (Table 2). All EOLp in the multimorbidity trajectory (n=64) were classified in the moderate and advanced frailty groups.

**Table 2.** Classification of end-of-life people according to demographic characteristics, Frail-VIG index scores and end-of-life trajectory (n=260), *n* (%)



|                | Demographic characteristics |                  | Frailty degree, n (%) |              |                  |                  |           |
|----------------|-----------------------------|------------------|-----------------------|--------------|------------------|------------------|-----------|
|                | Age (years), mean (SD)      | Sex (% of women) | Not frail             | Mild Frailty | Moderate Frailty | Advanced Frailty | Total     |
| Cancer         | 85.7 (5.4)                  | 45.2             | 0 (0)                 | 3 (9.7)      | 7 (22.6)         | 21 (67.7)        | 31 (11.9) |
| Organ Failure  | 86.9 (5.3)                  | 46.8             | 0 (0)                 | 4 (5.1)      | 20 (25.3)        | 55 (69.6)        | 79 (30.4) |
| Dementia       | 85.4 (5.3)                  | 65.1             | 0 (0)                 | 1 (1.1)      | 25 (29.1)        | 60 (69.8)        | 86 (33.1) |
| Multimorbidity | 86.9 (7.3)                  | 54.7             | 0 (0)                 | 0 (0)        | 16 (25.0)        | 48 (75.0)        | 64 (24.6) |
| Total          | N/A                         | N/A              | 0 (0)                 | 8 (3.1)      | 68 (26.1)        | 184 (70.8)       | 260       |

N/A, not applicable; SD, standard deviation

### Relationship between Frailty Degree and Survival

Of the complete cohort (EOLp and non-EOLp), 338 (57.3%) study patients died during the 2-year follow-up period. Mortality was significantly higher in EOLp than in non-EOLp: 220 (84.6%) and 118 (35.7%), respectively ( $p < 0.001$ ). The log-rank test comparing the survival curves of each frailty degree revealed significant differences in the overall population ( $X^2 = 423, p < 0.0001$ ), EOLp ( $X^2 = 69.9, p < 0.0001$ ), and non-EOLp ( $X^2 = 122, p < 0.0001$ ) (Figure 1). Correspondingly, the C coefficient for concordance between the survival time and the Frail-VIG score was 0.8, indicating that higher scores of the Frail-VIG index are associated with lower survival.

### Relationship between Frailty Degree and Survival in End-of-Life People

The frequencies of death at the end of the 2-year follow-up period for each trajectory in EOLp are presented in Table 3. Survival curves, plotted using the Kaplan-Meier model for each frailty category (i.e., mild, intermediate, and advanced), differed among the different end-of-life trajectories, revealing different patterns of survival decline according to the frailty degree (Figure 2).

**Table 3.** Status of end-of-life people according to the Frail-VIG index scores and end-of-life trajectory after the 2-year follow-up (n=260), n (%)

|                | n  | Status | Mild Frailty | Moderate Frailty | Advanced Frailty | Total     |
|----------------|----|--------|--------------|------------------|------------------|-----------|
| Cancer         | 31 | Dead   | 2 (6.5)      | 7 (22.6)         | 21 (67.7)        | 30 (96.8) |
|                |    | Alive  | 1 (3.2)      | 0 (0)            | 0 (0)            | 1 (3.2)   |
| Organ Failure  | 79 | Dead   | 2 (2.5)      | 16 (20.2)        | 54 (68.4)        | 72 (91.1) |
|                |    | Alive  | 2 (2.5)      | 4 (5.1)          | 1 (1.3)          | 7 (8.9)   |
| Dementia       | 86 | Dead   | 1 (1.2)      | 6 (6.9)          | 55 (64.0)        | 62 (72.1) |
|                |    | Alive  | 0 (0)        | 19 (22.1)        | 5 (5.8)          | 24 (27.9) |
| Multimorbidity | 64 | Dead   | 0 (0)        | 8 (12.5)         | 48 (75.0)        | 56 (87.5) |
|                |    | Alive  | 0 (0)        | 8 (12.5)         | 0 (0)            | 8 (12.5)  |

A Cox regression model with the interaction between Frail-VIG index and illness trajectories revealed that the effect of the frailty degree on survival was associated with illness trajectories ( $p < 0.01$  for all the coefficients), even though the influence of illness trajectory progressively decreased as the frailty degree increased (Figure 3 and Table S1). Sex and age were excluded as covariates due to their lack of statistical significance (Table S2 and S3). The proportional hazard assumption was supported by the Schoenfeld residuals ( $p > 0.1$  for both global and each covariate tests). The estimated hazard ratios were 1.61 for people with dementia (95% CI=1.43-1.81), 1.30 for people with organ failure (95% CI=1.18-1.43), 1.30 for people with multimorbidity (95% CI=1.18-1.42), and 1.13 for people with cancer (95% CI=1.02-1.25) (Table S4 and S5). These results show that for each additional deficit of the total of 25 deficits assessed (i.e., a 0.04 increase in the Frail-VIG index) the risk of death increased by 61.5%, 30.1%, 29.6% and 12.9% in people with dementia, organ failure, multimorbidity and cancer, respectively.

1  
2  
3 The ROC analysis of the Frail-VIG index for the EOLp showed an AUC of 0.87 (95%  
4 CI:0.83-0.92) after one year and 0.87 (95% CI:0.84-0.92) after two years of follow-up.  
5  
6  
7 Of the 184 EOLp with advanced frailty (Frail-VIG index score > 0.5), 178 (96.7%) had  
8  
9 died at two years of follow-up. The AUC differed among each of the four end-of-life  
10  
11 trajectories: cancer (1 and 0.93), organ failure (0.86 and 0.90), dementia (0.92 and 0.92)  
12  
13 and multimorbidity (0.91 and 0.94), after one and two years of follow-up, respectively.  
14  
15  
16 Despite these differences, the AUC remained high irrespective of the illness trajectory.  
17  
18 Regarding the sensitivity and specificity of the Frail-VIG index as prognosis factor of  
19  
20 mortality, the most sensitive and specific cut-off was 0.5 at both one and two years after  
21  
22 follow-up, showing a sensitivity of 0.81 and 0.85 and a specificity of 0.83 and 0.81,  
23  
24  
25 respectively.  
26  
27  
28

## 29 **DISCUSSION**

30  
31  
32 In this prospective, observational study including 590 patients admitted at an Acute  
33  
34 Geriatric unit (AGU), we found that all older patients were frail towards the end of life  
35  
36 (the prevalence of moderate-to-advanced frailty was 97% among people within an end-  
37  
38 of-life trajectory and 55% outside it). Furthermore, advanced frailty was the predominant  
39  
40 frailty category (ranged 68 to 75%) for all end-of-life trajectories: cancer, organ failure,  
41  
42 dementia, and multimorbidity. Overall, the Frail-VIG index had a high capacity to predict  
43  
44 death at one and two years (AUC 0.87), albeit to a different extent for the end-of-life  
45  
46 categories cancer, organ failure, dementia and multimorbidity (AUC was always >0.86  
47  
48 for mortality at either one or two years). This finding confirms the hypothesis that the  
49  
50 degree of frailty is related to prognosis regardless of the illness trajectory.  
51  
52  
53

54  
55 The characteristics and outcomes of the cohort assessed in this study, which included all  
56  
57 patients admitted to an Acute Geriatric unit (AGU), were similar to those previously  
58  
59 reported. All the persons assessed in this study had a Frail-VIG index score <0.8, similar  
60

1  
2  
3 to previous studies showing that the theoretical maximum score is 0.7. According to these  
4 studies, the accumulation of 2/3 of all possible deficits (Frailty index score >0.7) results  
5 in death due to the person's inability to overcome more deficits, a phenomenon defined  
6 as system failure.[33,34] Likewise, similar to previous studies in other populations, the  
7 mortality rate at 1 to 2 years in our cohort was nearly 100% for the EOLp with frailty  
8 index score >0.5.[34,35]  
9

10  
11 Furthermore, we provide evidence showing that the degree of frailty significantly  
12 influenced survival irrespective of the advanced illness and end-of-life trajectory. In spite  
13 of this general influence, the survival curves according to the frailty degree followed  
14 different patterns for the four end-of-life trajectories, enabling the description of different  
15 frailty or deficit accumulation end-of-life trajectories according to the main disease,  
16 specially in the absence of advanced frailty. As the frailty degree increased, differences  
17 between trajectories decreased, resulting in a trend towards a compression of survival  
18 curves in advanced frailty situations where mortality is very high irrespective of the main  
19 advanced illness and end-of-life trajectory. Thus, in EOLp with cancer, mortality rates  
20 were high regardless of the frailty degree (moderate or advanced), leading to the  
21 hypothesis, similar to recent studies, that cancer patients have a catastrophic accumulation  
22 of deficits.[36] In contrast, EOLp with dementia showed different mortality rates  
23 according to their frailty degree and died progressively, likely due to the natural history  
24 of the disease, suggesting a slower accumulation of deficits. People with multimorbidity  
25 and advanced frailty shows a survival profile similar to people with cancer, while those  
26 with moderate frailty have a survival rate more similar to people with dementia. Finally,  
27 persons with an organ disease would accumulate deficits in episodes, even though  
28 prospective studies with serial frailty indexes would be required to test this hypothesis.  
29  
30  
31  
32  
33  
34  
35  
36  
37  
38  
39  
40  
41  
42  
43  
44  
45  
46  
47  
48  
49  
50  
51  
52  
53  
54  
55  
56  
57  
58  
59  
60

1  
2  
3 In this regard, similar to recent studies describing different trajectories according to the  
4 evolution of the social, spiritual or psychological situation of EOLp,[3] prospective  
5 studies following the degree of frailty using electronic frailty indexes have described three  
6 different trajectories (i.e., rapidly rising frailty, moderately increasing frailty, and stable  
7 frailty).[36] Even though more studies would be required to describe different end-of-life  
8 frailty trajectories, the fact that each end-of-life trajectory resulted in different mortality  
9 curves supports a dynamic view of EOLp.

10  
11  
12 The traditional association of frailty to the “third end-of-life trajectory” (i.e., dementia)  
13 [13,14] has probably been influenced by the lack of specific prognostic instruments for  
14 persons in this trajectory, unlike those in the cancer [37,38] or organ disease [39,40]  
15 trajectories. Our results regarding the high prevalence of frailty in all end-of-life  
16 trajectories support the validity of the concept that frailty may be present in all trajectories  
17 beyond the dementia trajectory. In addition to expanding the concept of frailty, our study  
18 underscores the need to consider a further development of the end-of-life trajectories. Of  
19 the 260 people who were identified as people in end-of-life situation, 24.6% did not have  
20 severity criteria for a single disease, although all of them had at least 2 chronic conditions.  
21 The identification of this cluster of people with advanced frailty and multimorbidity can  
22 help provide them early palliative care, and the benefits derived from it.[41,42]

23  
24  
25 Frailty Indices based on a Comprehensive Geriatric Assessment, such as the Frail-VIG  
26 index, may help professionals address one of the current challenges in palliative care  
27 [18,19,43]: the identification, assessment, and management of older people (i.e., aged  
28 >80 years) with palliative care needs [20,44]. First, assessment and quantification of  
29 frailty degree, which is suitable to synthesize the results of a multidimensional evaluation,  
30 can be useful to validate the identification of people in an end-of-life situation;[12]  
31 secondly, due to its ability to discriminate between different degrees of severity, frailty  
32  
33  
34  
35  
36  
37  
38  
39  
40  
41  
42  
43  
44  
45  
46  
47  
48  
49  
50  
51  
52  
53  
54  
55  
56  
57  
58  
59  
60

1  
2  
3 indexes can be very useful to healthcare professionals for the situational diagnosis of the  
4 first and second end-of-life transition,[6,12] and monitorization of EOLp  
5 evolution;[45,46] and finally, quantification of frailty would enable palliative care  
6 customization [47,48] and engage people, caregivers and healthcare professionals in  
7 sharing decision-making and advance care planning.  
8  
9

10 The results of this study should be interpreted in the context of some limitations,  
11 particularly regarding the generalizability of the results. Firstly, the recruitment strategy  
12 based on an AGU solely enriched our study sample with older patients, likely precluding  
13 the applicability of these study results to younger patients. Secondly, the analysis of  
14 EOLp frailty across the various end-of-life trajectory categories importantly reduced the  
15 number of patients in each group, thus limiting the statistical power of these analyses.  
16  
17 However, despite the reduced number of patients in some groups, our analysis yielded  
18 statistically significant results. In spite of its limitations, to our knowledge, this study is  
19 the first to evaluate the degree of frailty using a frailty index in very old patients identified  
20 as EOLp. Frailty was evaluated in a cohort of geriatric patients, including EOLp and non-  
21 EOLp, and the data for this study was collected during routine geriatric assessment, as  
22 opposed to previous studies that used electronic health record data to evaluate the degree  
23 of frailty.[49] Moreover, the single computer information system of Catalonia (HC3) that  
24 collects the medical records and mortality status of all patients reported by all health  
25 providers prevented loss of patients up to follow-up.[32] Consequently, the lack of  
26 missing data due to the HC3 system, along with the use of standard and validated tools to  
27 identify EOLp (NECPAL) and to measure frailty (Frail-VIG index) increased the  
28 accuracy of the results obtained from this study. The early identification of people  
29 needing palliative care and the more accurate definition of the various end-of-life  
30 trajectories opened the door to a novel perspective of palliative care.[50] In this regard,  
31  
32  
33  
34  
35  
36  
37  
38  
39  
40  
41  
42  
43  
44  
45  
46  
47  
48  
49  
50  
51  
52  
53  
54  
55  
56  
57  
58  
59  
60

1  
2  
3 the use of frailty as an overarching concept in the assessment of all people in an end-of-  
4 life situation —at least of those with a multimorbid profile— might contribute to go one  
5 step further in this novel approach to palliative care.  
6  
7  
8  
9

## 10 11 **CONCLUSIONS**

12  
13  
14 Our results showed that all end-of-life people were frail (mostly with advanced frailty)  
15 irrespective of the end-of-life trajectory. Their degree of frailty, measured using the Frail-  
16 VIG index, influenced mortality. This indicates a close relationship between frailty, end-  
17 of-life status, and mortality for all people who die. Measuring frailty using a frailty index  
18 could be useful in routine practice for healthcare professionals to understand the  
19 heterogeneous nature of people needing palliative care and tailor their care to the patient's  
20 needs. The survival pattern of people with multimorbidity could support the description  
21 of a composite illness trajectory for this patient group.  
22  
23  
24  
25  
26  
27  
28  
29  
30  
31  
32  
33  
34  
35

## 36 37 **DECLARATIONS**

### 38 39 40 **Ethics Approval and Consent to Participate**

41  
42 All patients and family relatives of patients with advanced dementia situation ( $GDS \geq 6$ )  
43 signed the written informed consent for participation before any data was recorded. The  
44 study protocol was approved by the Ethics Committee of the University Hospital of Vic  
45 (2,014,850 PR80). This study was conducted in accordance with the Helsinki Declaration  
46 and the local Personal Data Protection Law (LOPD 15/1999).  
47  
48  
49  
50  
51  
52  
53  
54  
55

### 56 57 **Consent for publication**

58 Not applicable.  
59  
60

## Data Sharing

The anonymized datasets analyzed during the current study are available from the corresponding author on reasonable request.

## Competing interests

The authors declare no conflict of interest.

## Funding

This study was funded by the Instituto de Salud Carlos III (ISCIII) 17/02240 grant

## Author's contributions

JAN, AT, JCM, and XGB were responsible for the conception and design of the study. JAN coordinated and substantially contributed to the data collection. JCM and RO performed the statistical analysis. All authors (JAN, SAM, AT, JCM, SM, RO, NL, JE, SS and XGB) were involved in interpretation of data. JAN wrote the initial draft of the manuscript and all the other authors (SAM, AT, JCM, SM, RO, NL, JE, SS and XGB) critically revised the manuscript. All authors (JAN, SAM, AT, JCM, SM, RO, NL, JE, SS and XGB) have provided approval for the final version of the manuscript submitted for publication and agree to be accountable for all aspects of the work.

## Acknowledgements

The authors would like to acknowledge i2e3 Biomedical Research Institute for providing medical writing assistance.

## REFERENCES

- 1 Boyd K, Murray SSA. Recognising and managing key transitions in end of life



- 1  
2  
3 care. *BMJ* 2010;**341**:c4863. doi:10.1136/bmj.c4863  
4  
5  
6 2 Gomez-Batiste X, Martinez-Munoz M, Blay C, *et al.* Identifying patients with  
7  
8 chronic conditions in need of palliative care in the general population:  
9  
10 development of the NECPAL tool and preliminary prevalence rates in Catalonia.  
11  
12 *BMJ Support Palliat Care* 2013;**3**:300–8. doi:10.1136/bmjspcare-2012-000211  
13  
14 3 Murray SA, Kendall M, Mitchell G, *et al.* Palliative care from diagnosis to death.  
15  
16 *BMJ* 2017;**356**:j878. doi:10.1136/bmj.j878  
17  
18 4 Kimbell B, Murray SA, Macpherson S BK. Embracing inherent uncertainty in  
19  
20 advanced illness. *BMJ Br Med J* 2016;**354**:i3802.  
21  
22  
23 5 Gómez-Batiste X, Blay C, Broggi MA, *et al.* Ethical Challenges of Early  
24  
25 Identification of Advanced Chronic Patients in Need of Palliative Care. *J Palliat*  
26  
27 *Care* 2018;**33**:247–51. doi:10.1177/0825859718788933  
28  
29  
30 6 Amblàs-Novellas J, Espauella J, Rexach L *et al*, *et al.* Frailty, severity,  
31  
32 progression and shared decision-making: A pragmatic framework for the challenge  
33  
34 of clinical complexity at the end of life. *Eur Geriatr Med* 2015;**6**:189–194.  
35  
36 doi:10.1016/j.eurger.2015.01.002  
37  
38  
39 7 Cardona-Morrell M, Lewis E, Suman S, *et al.* Recognising older frail patients near  
40  
41 the end of life: What next? *Eur J Intern Med* 2017;**45**:84–90.  
42  
43 doi:10.1016/j.ejim.2017.09.026  
44  
45  
46 8 Koller K, Rockwood K. Frailty in older adults: Implications for end-of-life care.  
47  
48 *Cleve Clin J Med* 2013;**80**:168–74. doi:10.3949/ccjm.80a.12100  
49  
50  
51 9 Stow D, Spiers G, Matthews FE, *et al.* What is the evidence that people with frailty  
52  
53 have needs for palliative care at the end of life? A systematic review and narrative  
54  
55 synthesis. *Palliat Med* 2019;**33**:399–414. doi:10.1177/0269216319828650  
56  
57  
58 10 Mousa A, Savva GM, Mitnitski A, *et al.* Is frailty a stable predictor of mortality  
59  
60

- 1  
2  
3 across time? Evidence from the Cognitive Function and Ageing Studies. *Age*  
4 *Ageing* 2018;**47**:721–7. doi:10.1093/ageing/afy077  
5  
6  
7  
8 11 Pialoux T, Goyard J, Hermet R. When frailty should mean palliative care. *J Nurs*  
9 *Educ Pract* 2013;**3**:75–84. doi:10.5430/jnep.v3n7p75  
10  
11  
12 12 Pollack LR, Goldstein NE, Gonzalez WC, *et al.* The Frailty Phenotype and  
13 Palliative Care Needs In Older Survivors of Critical Illness Lauren. *J Am Geriatr*  
14 *Soc* 2018;**65**:1168–75. doi:10.1111/jgs.14799.The  
15  
16  
17  
18  
19 13 Lunney JR, Lynn J, Foley DJ, *et al.* Patterns of functional decline at the end of life.  
20 *JAMA* 2003;**289**:2387–92. doi:10.1001/jama.289.18.2387  
21  
22  
23  
24 14 Murray S a, Boyd K, Sheikh A. Palliative care in chronic illness. *BMJ*  
25 2005;**330**:611–2. doi:10.1136/bmj.330.7492.611  
26  
27  
28  
29 15 Rodríguez-Mañas L, Féart C, Mann G, *et al.* Searching for an operational  
30 definition of frailty: A delphi method based consensus statement. the frailty  
31 operative definition-consensus conference project. *Journals Gerontol - Ser A Biol*  
32 *Sci Med Sci* 2013;**68**:62–7. doi:10.1093/gerona/gls119  
33  
34  
35  
36  
37 16 Cesari M, Gambassi G, van Kan GA, *et al.* The frailty phenotype and the frailty  
38 index: different instruments for different purposes. *Age Ageing* 2014;**43**:10–2.  
39 doi:10.1093/ageing/aft160  
40  
41  
42  
43  
44 17 Bone AE, Morgan M, Maddocks M, *et al.* Developing a model of short-term  
45 integrated palliative and supportive care for frail older people in community  
46 settings: perspectives of older people, carers and other key stakeholders. *Age*  
47 *Ageing* 2016;**45**:863–73. doi:10.1093/ageing/afw124  
48  
49  
50  
51  
52  
53 18 Moriarity J, Rutter D, Ross PD, *et al.* End of life care for people with dementia  
54 living in care homes. 2012;:4p.  
55  
56  
57  
58 19 Dixon J, King D, Matosevic T, *et al.* Equity in the provision of palliative care in  
59  
60

- 1  
2  
3 the UK: Review of evidence. 2015;:145.  
4  
5  
6 20 Teggi D. Unexpected death in ill old age: An analysis of disadvantaged dying in  
7 the English old population. *Soc Sci Med* 2018;**217**:112–20.  
8 doi:10.1016/j.socscimed.2018.09.048  
9  
10  
11  
12 21 Cesari M, Prince M, Thiyagarajan JA, *et al.* Frailty: An Emerging Public Health  
13 Priority. *J Am Med Dir Assoc* 2016;**17**:188–92. doi:10.1016/j.jamda.2015.12.016  
14  
15  
16  
17 22 Moorhouse P, Rockwood K, Morley JE, *et al.* Frailty Consensus: A Call to Action.  
18 *J Am Med Dir Assoc* 2013;**14**:392–7.  
19 doi:http://dx.doi.org/10.1016/j.jamda.2013.03.022  
20  
21  
22  
23  
24 23 British Geriatrics Society. End of Life Care in Frailty: Identification and  
25 prognostication | British Geriatrics Society.  
26 https://www.bgs.org.uk/resources/end-of-life-care-in-frailty-identification-and-  
27 prognostication (accessed 29 Nov 2020).  
28  
29  
30  
31  
32  
33 24 Amblàs-Novellas J, Martori JC, Espauella J, *et al.* Frail-VIG index: a concise  
34 frailty evaluation tool for rapid geriatric assessment. *BMC Geriatr* 2018;**18**:29.  
35 doi:10.1186/s12877-018-0718-2  
36  
37  
38  
39  
40 25 von Elm E, Altman DG, Egger M, *et al.* The Strengthening the Reporting of  
41 Observational Studies in Epidemiology (STROBE) statement: guidelines for  
42 reporting observational studies. *Lancet* 2007;**370**:1453–7. doi:10.1016/S0140-  
43 6736(07)61602-X  
44  
45  
46  
47  
48  
49 26 Amblàs-Novellas J, Martori JC, Molist Brunet N, *et al.* Frail-VIG index: Design  
50 and evaluation of a new frailty index based on the Comprehensive Geriatric  
51 Assessment. *Rev Esp Geriatr Gerontol* 2017;**52**:119–27.  
52 doi:10.1016/j.regg.2016.09.003  
53  
54  
55  
56  
57  
58 27 Moreno-Ariño M, Torrente Jiménez I, Cartanya Gutiérrez A, *et al.* Assessing the  
59  
60

- 1  
2  
3 strengths and weaknesses of the Clinical Frailty Scale through correlation with a  
4 frailty index. *Aging Clin Exp Res* 2020;**32**:2225–32. doi:10.1007/s40520-019-  
5 01450-w  
6  
7  
8  
9  
10 28 Madruga-Flores M, Gómez-del Río R, Delgado-Domínguez L, *et al.* Capacidad  
11 predictiva de fragilidad basal y fuerza de prensión al ingreso en resultados al alta  
12 en una unidad geriátrica de recuperación funcional. *Rev Esp Geriatr Gerontol*  
13 Published Online First: 19 January 2021. doi:10.1016/J.REGG.2020.12.002  
14  
15  
16  
17  
18 29 Gómez-Batiste X, Martínez-Muñoz M, Blay C, *et al.* Prevalence and  
19 characteristics of patients with advanced chronic conditions in need of palliative  
20 care in the general population: A cross-sectional study. *Palliat Med* 2014;**28**:302–  
21 11. doi:10.1177/0269216313518266  
22  
23  
24  
25  
26  
27  
28 30 Gómez-Batiste X, Turrillas P, Tebé C, *et al.* NECPAL tool prognostication in  
29 advanced chronic illness: A rapid review and expert consensus. *BMJ Support*  
30 *Palliat Care* Published Online First: 2020. doi:10.1136/bmjspcare-2019-002126  
31  
32  
33  
34  
35 31 CENTRAL CATALONIA CHRONICITY RESEARCH GROUP. Utility of  
36 NECPAL. <https://en.c3rg.com/necpal> (accessed 29 Nov 2020).  
37  
38  
39  
40 32 Solans O, Gallego C, Garcia-Cuyas F, *et al.* Shared Medical Record, Personal  
41 Health Folder and Health and Social Integrated Care in Catalonia. In: *New*  
42 *Perspectives in Medical Records*. Springer, Cham 2017. 49–64. doi:10.1007/978-  
43 3-319-28661-7\_4  
44  
45  
46  
47  
48  
49 33 Rockwood K, Mitnitski A. Frailty Defined by Deficit Accumulation and Geriatric  
50 Medicine Defined by Frailty. *Clin. Geriatr. Med.* 2011;**27**:17–26.  
51 doi:10.1016/j.cger.2010.08.008  
52  
53  
54  
55  
56 34 Rockwood K, Mitnitski A. Limits to deficit accumulation in elderly people. *Mech*  
57 *Age Dev* 2006;**127**:494–6. doi:10.1016/j.mad.2006.01.002  
58  
59  
60

- 1  
2  
3 35 Rockwood K, Rockwood MRH, Mitnitski A. Physiological redundancy in older  
4 adults in relation to the change with age in the slope of a frailty index. *J Am Geriatr*  
5 *Soc* 2010;**58**:318–23. doi:10.1111/j.1532-5415.2009.02667.x  
6  
7  
8  
9  
10 36 Stow D, Matthews FE, Hanratty B. Frailty trajectories to identify end of life: A  
11 longitudinal population-based study. *BMC Med* 2018;**16**:1–7.  
12 doi:10.1186/s12916-018-1148-x  
13  
14  
15  
16  
17 37 Evans C, McCarthy M. Prognostic uncertainty in terminal care: can the Karnofsky  
18 index help? *Lancet (London, England)* 1985;**1**:1204–6. doi:10.1016/s0140-  
19 6736(85)92876-4  
20  
21  
22  
23  
24 38 Anderson F, Downing GM, Hill J, *et al.* Palliative Performance Scale (PPS): A  
25 new tool. *J Palliat Care* 1996;**12**:5–11.  
26  
27  
28  
29 39 van Dijk WD, van den Bemt L, van den Haak-Rongen S, *et al.* Multidimensional  
30 prognostic indices for use in COPD patient care. A systematic review. *Respir. Res.*  
31 2011;**12**:151. doi:10.1186/1465-9921-12-151  
32  
33  
34  
35 40 Walter LC, Brand RJ, Counsell SR, *et al.* Development and validation of a  
36 prognostic index for 1-year mortality in older adults after hospitalization. *JAMA*  
37 2001;**285**:2987–94. doi:10.1001/jama.285.23.2987  
38  
39  
40  
41 41 Moine S, Murray SA, Boyd K, *et al.* Palliative care and the endless cycle of serious  
42 health-related suffering. *Lancet.* 2018;**392**:471–2. doi:10.1016/S0140-  
43 6736(18)31195-4  
44  
45  
46  
47  
48  
49 42 Aldridge MD, Bradley EH. Epidemiology and patterns of care at the end of life:  
50 Rising complexity, shifts in care patterns and sites of death. *Health Aff*  
51 2017;**36**:1175–83. doi:10.1377/hlthaff.2017.0182  
52  
53  
54  
55  
56 43 (NCPC) NC for PC. National Council for Palliative Care ( NCPC ) Briefing The  
57 Government ' s National Commitment For End Of Life Care. 2016.  
58  
59  
60

- 1  
2  
3 44 PA C, GE G, DA R, *et al.* Prediction of appropriate timing of palliative care for  
4  
5 older adults with non-malignant life-threatening disease: a systematic review. *Age*  
6  
7 *Ageing* 2005;**34**. doi:10.1093/AGEING/AFI054  
8  
9  
10 45 Gill TM, Gahbauer E a, Allore HG, *et al.* Transitions between frailty states among  
11  
12 community-living older persons. *Arch Intern Med* 2006;**166**:418–23.  
13  
14 doi:10.1001/archinte.166.4.418  
15  
16  
17 46 Liu ZY, Wei YZ, Wei LQ, *et al.* Frailty transitions and types of death in Chinese  
18  
19 older adults: A population-based cohort study. *Clin Interv Aging* 2018;**13**:947–56.  
20  
21 doi:10.2147/CIA.S157089  
22  
23  
24 47 The Picker Institute. *Patient - Centered Care 2015 : Scenarios , Vision , Goals &*  
25  
26 *Next Steps*. 2004.  
27  
28  
29 48 Cohen-Mansfield J, Skornick-Bouchbinder M, Brill S. Trajectories of End of Life:  
30  
31 A Systematic Review. *Journals Gerontol - Ser B Psychol Sci Soc Sci* 2018;**73**:564–  
32  
33 72. doi:10.1093/geronb/gbx093  
34  
35  
36 49 Clegg A, Bates C, Young J, *et al.* Development and validation of an electronic  
37  
38 frailty index using routine primary care electronic health record data. *Age Ageing*  
39  
40 2016;**45**:353–60. doi:10.1093/ageing/afw039  
41  
42  
43 50 Amblàs-Novellas J, Murray SA, Espauella J, *et al.* Identifying patients with  
44  
45 advanced chronic conditions for a progressive palliative care approach: a cross-  
46  
47 sectional study of prognostic indicators related to end-of-life trajectories. *BMJ*  
48  
49 *Open* 2016;**6**:e012340. doi:10.1136/bmjopen-2016-012340  
50  
51  
52  
53  
54  
55  
56  
57  
58  
59  
60

## FIGURE LEGENDS

**Figure 1.** Survival according to the degree of frailty in (A) the total study patients, (B) end-of-life people, and (C) Non End-of-life people.

**Figure 2.** Survival according to the degree of frailty and end-of-life trajectory: (A) cancer, (B) organ failure, (C) dementia, and (D) Multimorbidity.

**Figure 3.** Survival probability of end-of-life people in the different illness trajectories according to Frail-VIG index value: Frail-VIG index 0.44 (15th percentile) (A), Frail-VIG index 0.56 (median) (B) and Frail-VIG index 0.68 (90th percentile) (C).



Figure 1. Survival according to the degree of frailty in (A) the total study patients, (B) end-of-life people, and (C) Non End-of-life people.

860x556mm (72 x 72 DPI)



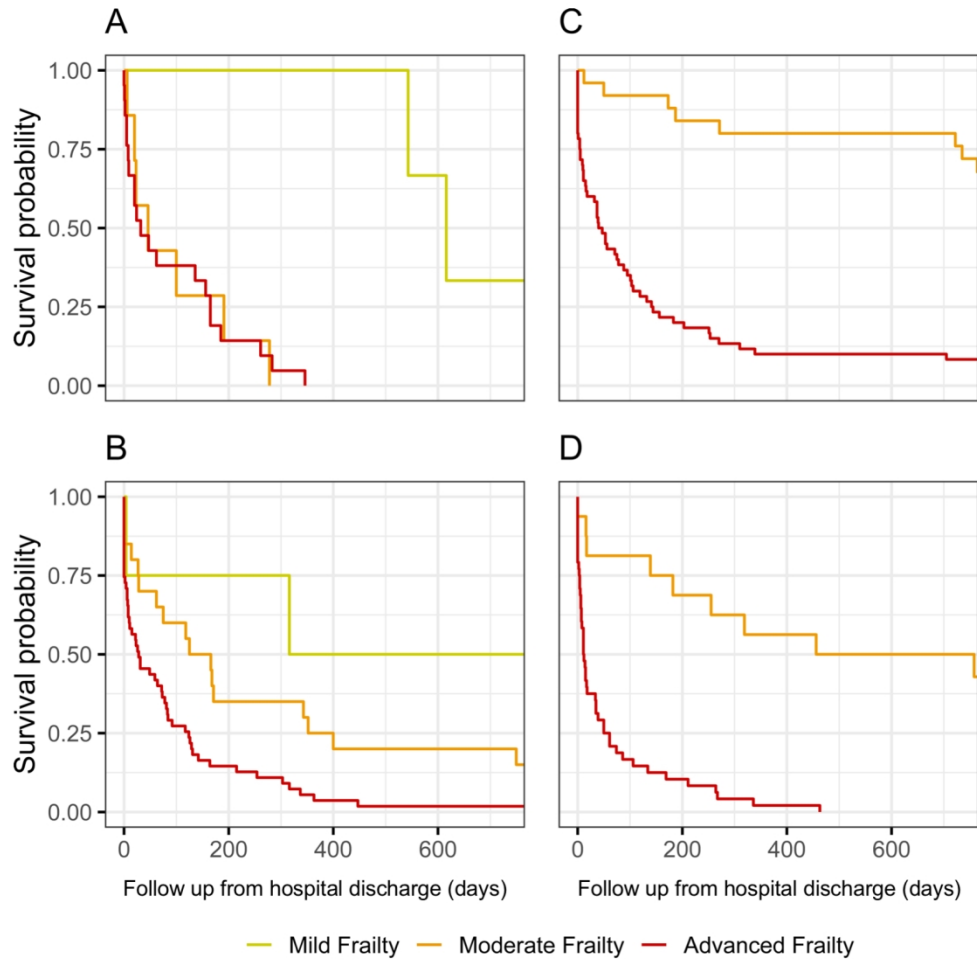

Figure 2. Survival according to the degree of frailty and end-of-life trajectory: (A) cancer, (B) organ failure, (C) dementia, and (D) Multimorbidity.

616x593mm (72 x 72 DPI)



Figure 3. Survival probability of end-of-life people in the different illness trajectories according to Frail-VIG index value: Frail-VIG index 0.44 (15th percentile) (A), Frail-VIG index 0.56 (median) (B) and Frail-VIG index 0.68 (90th percentile) (C).

874x564mm (72 x 72 DPI)

1  
2  
3 **Supplementary Information for the Submission by Amblàs-Novellas et**  
4  
5  
6 **al. “Frailty Degree and Illness Trajectories in Older People towards the**  
7  
8 **End-of-life: A Prospective Observational Study”.**  
9  
10  
11  
12  
13  
14  
15  
16  
17  
18  
19  
20  
21  
22  
23  
24  
25  
26  
27  
28  
29  
30  
31  
32  
33  
34  
35  
36  
37  
38  
39  
40  
41  
42  
43  
44  
45  
46  
47  
48  
49  
50  
51  
52  
53  
54  
55  
56  
57  
58  
59  
60

For peer review only

## Supplementary Methods

### *Construction of the Cox Proportional Hazards Model and Calculation of Hazard Ratios*

A Cox Proportional Hazards (PH) model was constructed considering a multiplicative interaction between the Frail-VIG index and the qualitative variable “illness trajectory” (dementia was set as the reference category); see the estimation results in Table S1. When the model was constructed considering sex and age as covariates, sex lacked statistical significance (Table S2) and, similarly, upon removal of sex from the model, age lacked statistical significance (Table S3). Consequently, sex and age were excluded and Frail-VIG index score and Illness trajectories were the only covariates that remained in the final Cox PH model (Table S1).

To calculate hazard ratios for each illness trajectory, each hazard ratio was computed as the exponential of the sum of the coefficient of the Frail-VIG index (11.99) and each interaction coefficient (0, -5.41, -5.51, -8.96), yielding hazard ratios for one unit increase in the Frail-VIG index (Table S4). However, as Frail-VIG index scores are expressed as 0.04 increments for each additional deficit of a total of 25 deficits ( $1/25=0.04$ ), hazard ratios were subsequently raised to 0.04, to calculate hazard ratios consistent with the units of Frail-VIG index scores (Table S5).

## Supplementary Tables

**Table S1.** Cox Proportional Hazards fit

| Variable                             | Beta  | SE   | z     | P              | 95% CI          |
|--------------------------------------|-------|------|-------|----------------|-----------------|
| <b>Frail-VIG index score</b>         | 11.99 | 1.48 | 8.09  | < <b>0.001</b> | (9.08, 14.89)   |
| <b>Illness trajectory</b>            |       |      |       |                |                 |
| Dementia (ref)                       | -     | -    | -     | -              | -               |
| Organ Failure                        | 3.75  | 1.05 | 3.56  | < <b>0.001</b> | (1.69, 5.82)    |
| Multimorbidity                       | 3.48  | 1.08 | 3.23  | <b>0.001</b>   | (1.37, 5.60)    |
| Cancer                               | 5.69  | 1.12 | 5.10  | < <b>0.001</b> | (3.50, 7.87)    |
| <b>Frail-VIG index by trajectory</b> |       |      |       |                |                 |
| Organ Failure                        | -5.41 | 1.82 | -2.98 | <b>0.003</b>   | (-8.97, -1.85)  |
| Multimorbidity                       | -5.51 | 1.80 | -3.07 | <b>0.002</b>   | (-9.02, -1.99)  |
| Cancer                               | -8.96 | 1.96 | -4.57 | < <b>0.001</b> | (-12.80, -5.12) |

**Table S2.** Cox Proportional Hazards fit with sex and age

| <b>Variable</b>                | <b>Beta</b> | <b>SE</b> | <b>z</b> | <b>P</b>         | <b>95% CI</b>   |
|--------------------------------|-------------|-----------|----------|------------------|-----------------|
| <b>Frail-VIG index score</b>   | 11.91       | 1.46      | 8.14     | <b>&lt;0.001</b> | (9.04, 14.78)   |
| <b>Illness trajectory</b>      |             |           |          |                  |                 |
| Dementia (ref)                 | -           | -         | -        | -                | -               |
| Organ Failure                  | 3.44        | 1.05      | 3.26     | <b>0.001</b>     | (1.37, 5.50)    |
| Multimorbidity                 | 3.13        | 1.07      | 2.92     | <b>0.003</b>     | (1.03, 5.23)    |
| Cancer                         | 5.80        | 1.09      | 5.32     | <b>&lt;0.001</b> | (3.66, 7.94)    |
| <b>Sex</b>                     |             |           |          |                  |                 |
| Female (ref)                   | -           | -         | -        | -                | -               |
| Male                           | 0.22        | 0.14      | 1.62     | 0.11             | (-0.05, 0.49)   |
| <b>Age</b>                     | 0.03        | 0.01      | 2.20     | <b>0.03</b>      | (0.00, 0.05)    |
| <b>Frail-VIG by trajectory</b> |             |           |          |                  |                 |
| Organ Failure                  | -4.96       | 1.81      | -2.74    | <b>0.006</b>     | (-8.52, -1.41)  |
| Multimorbidity                 | -5.01       | 1.78      | -2.82    | <b>0.005</b>     | (-8.49, -1.53)  |
| Cancer                         | -9.35       | 1.92      | -4.88    | <b>&lt;0.001</b> | (-13.11, -5.59) |

**Table S3.** Cox Proportional Hazards fit with age

| Variable                       | Beta  | SE   | z     | P                | 95% CI          |
|--------------------------------|-------|------|-------|------------------|-----------------|
| <b>Frail-VIG index score</b>   | 11.94 | 1.48 | 8.09  | <b>&lt;0.001</b> | (9.05, 14.83)   |
| <b>Illness trajectory</b>      |       |      |       |                  |                 |
| Dementia (ref)                 | -     | -    | -     | -                | -               |
| Organ Failure                  | 3.57  | 1.05 | 3.39  | <b>&lt;0.001</b> | (1.50, 5.64)    |
| Multimorbidity                 | 3.18  | 1.08 | 2.94  | <b>0.003</b>     | (1.06, 5.30)    |
| Cancer                         | 5.77  | 1.11 | 5.21  | <b>&lt;0.001</b> | (3.60, 7.95)    |
| <b>Age</b>                     | 0.02  | 0.01 | 1.99  | 0.05             | (0.00, 0.05)    |
| <b>Frail-VIG by trajectory</b> |       |      |       |                  |                 |
| Organ Failure                  | -5.12 | 1.82 | -2.82 | <b>0.005</b>     | (-8.68, -1.56)  |
| Multimorbidity                 | -5.06 | 1.79 | -2.82 | <b>0.005</b>     | (-8.57, -1.55)  |
| Cancer                         | -9.17 | 1.95 | -4.71 | <b>&lt;0.001</b> | (-12.98, -5.35) |

**Table S4.** Hazard ratios for one unit increase in the Frail-VIG index

| <b>Variable</b> | <b>Hazard Ratio</b> | <b>Lower</b> | <b>Upper</b> | <b>P-value</b> |
|-----------------|---------------------|--------------|--------------|----------------|
| Dementia        | 160727.38           | 8807.45      | 2933118.39   | 0.00           |
| Organ Failure   | 717.52              | 64.17        | 8023.37      | 0.00           |
| Multimorbidity  | 652.87              | 62.60        | 6808.63      | 0.00           |
| Cancer          | 20.66               | 1.47         | 290.10       | 0.02           |

**Table S5.** Hazard ratios for a 0.04 unit increase in the Frail-VIG index

| <b>Variable</b> | <b>Hazard Ratio</b> | <b>Lower</b> | <b>Upper</b> | <b>P-value</b> |
|-----------------|---------------------|--------------|--------------|----------------|
| Dementia        | 1.62                | 1.44         | 1.81         | 0.00           |
| Organ Failure   | 1.30                | 1.18         | 1.43         | 0.00           |
| Multimorbidity  | 1.30                | 1.18         | 1.42         | 0.00           |
| Cancer          | 1.13                | 1.02         | 1.25         | 0.02           |



STROBE Statement—Checklist of items that should be included in reports of *cohort studies*

|                              | Item No | Recommendation                                                                                                                                                                                                                                                                                                         | Page No                     |
|------------------------------|---------|------------------------------------------------------------------------------------------------------------------------------------------------------------------------------------------------------------------------------------------------------------------------------------------------------------------------|-----------------------------|
| <b>Title and abstract</b>    | 1       | (a) Indicate the study's design with a commonly used term in the title or the abstract<br>(b) Provide in the abstract an informative and balanced summary of what was done and what was found                                                                                                                          | 1, 3<br>3, 4                |
| <b>Introduction</b>          |         |                                                                                                                                                                                                                                                                                                                        |                             |
| Background/rationale         | 2       | Explain the scientific background and rationale for the investigation being reported                                                                                                                                                                                                                                   | 5-6                         |
| Objectives                   | 3       | State specific objectives, including any prespecified hypotheses                                                                                                                                                                                                                                                       | 6                           |
| <b>Methods</b>               |         |                                                                                                                                                                                                                                                                                                                        |                             |
| Study design                 | 4       | Present key elements of study design early in the paper                                                                                                                                                                                                                                                                | 6                           |
| Setting                      | 5       | Describe the setting, locations, and relevant dates, including periods of recruitment, exposure, follow-up, and data collection                                                                                                                                                                                        | 6                           |
| Participants                 | 6       | (a) Give the eligibility criteria, and the sources and methods of selection of participants. Describe methods of follow-up<br>(b) For matched studies, give matching criteria and number of exposed and unexposed                                                                                                      | 6, 8<br>N/A                 |
| Variables                    | 7       | Clearly define all outcomes, exposures, predictors, potential confounders, and effect modifiers. Give diagnostic criteria, if applicable                                                                                                                                                                               | 7                           |
| Data sources/<br>measurement | 8*      | For each variable of interest, give sources of data and details of methods of assessment (measurement). Describe comparability of assessment methods if there is more than one group                                                                                                                                   | 7                           |
| Bias                         | 9       | Describe any efforts to address potential sources of bias                                                                                                                                                                                                                                                              | N/A                         |
| Study size                   | 10      | Explain how the study size was arrived at                                                                                                                                                                                                                                                                              | 6                           |
| Quantitative variables       | 11      | Explain how quantitative variables were handled in the analyses. If applicable, describe which groupings were chosen and why                                                                                                                                                                                           | 8                           |
| Statistical methods          | 12      | (a) Describe all statistical methods, including those used to control for confounding<br>(b) Describe any methods used to examine subgroups and interactions<br>(c) Explain how missing data were addressed<br>(d) If applicable, explain how loss to follow-up was addressed<br>(e) Describe any sensitivity analyses | 8<br>8<br>N/A<br>N/A<br>N/A |
| <b>Results</b>               |         |                                                                                                                                                                                                                                                                                                                        |                             |
| Participants                 | 13*     | (a) Report numbers of individuals at each stage of study—eg numbers potentially eligible, examined for eligibility, confirmed eligible, included in the study, completing follow-up, and analysed<br>(b) Give reasons for non-participation at each stage<br>(c) Consider use of a flow diagram                        | 9<br>N/A<br>N/A             |
| Descriptive data             | 14*     | (a) Give characteristics of study participants (eg demographic, clinical, social) and information on exposures and potential confounders<br>(b) Indicate number of participants with missing data for each variable of interest<br>(c) Summarise follow-up time (eg, average and total amount)                         | 9<br>N/A<br>11              |
| Outcome data                 | 15*     | Report numbers of outcome events or summary measures over time                                                                                                                                                                                                                                                         | 9, 11                       |

|    |                          |    |                                                                                                                                                                                                              |       |
|----|--------------------------|----|--------------------------------------------------------------------------------------------------------------------------------------------------------------------------------------------------------------|-------|
| 1  | Main results             | 16 | (a) Give unadjusted estimates and, if applicable, confounder-adjusted estimates and their precision (eg, 95% confidence interval). Make clear which confounders were adjusted for and why they were included | 9-13  |
| 2  |                          |    | (b) Report category boundaries when continuous variables were categorized                                                                                                                                    | 7     |
| 3  |                          |    | (c) If relevant, consider translating estimates of relative risk into absolute risk for a meaningful time period                                                                                             | N/A   |
| 4  |                          |    |                                                                                                                                                                                                              |       |
| 5  |                          |    |                                                                                                                                                                                                              |       |
| 6  | Other analyses           | 17 | Report other analyses done—eg analyses of subgroups and interactions, and sensitivity analyses                                                                                                               | N/A   |
| 7  |                          |    |                                                                                                                                                                                                              |       |
| 8  |                          |    |                                                                                                                                                                                                              |       |
| 9  |                          |    |                                                                                                                                                                                                              |       |
| 10 |                          |    |                                                                                                                                                                                                              |       |
| 11 | <b>Discussion</b>        |    |                                                                                                                                                                                                              |       |
| 12 | Key results              | 18 | Summarise key results with reference to study objectives                                                                                                                                                     | 13    |
| 13 | Limitations              | 19 | Discuss limitations of the study, taking into account sources of potential bias or imprecision. Discuss both direction and magnitude of any potential bias                                                   | 15-16 |
| 14 | Interpretation           | 20 | Give a cautious overall interpretation of results considering objectives, limitations, multiplicity of analyses, results from similar studies, and other relevant evidence                                   | 13-16 |
| 15 | Generalisability         | 21 | Discuss the generalisability (external validity) of the study results                                                                                                                                        | 15-16 |
| 16 |                          |    |                                                                                                                                                                                                              |       |
| 17 |                          |    |                                                                                                                                                                                                              |       |
| 18 |                          |    |                                                                                                                                                                                                              |       |
| 19 |                          |    |                                                                                                                                                                                                              |       |
| 20 |                          |    |                                                                                                                                                                                                              |       |
| 21 | <b>Other information</b> |    |                                                                                                                                                                                                              |       |
| 22 | Funding                  | 22 | Give the source of funding and the role of the funders for the present study and, if applicable, for the original study on which the present article is based                                                | 18    |
| 23 |                          |    |                                                                                                                                                                                                              |       |
| 24 |                          |    |                                                                                                                                                                                                              |       |
| 25 |                          |    |                                                                                                                                                                                                              |       |

\*Give information separately for exposed and unexposed groups.

**Note:** An Explanation and Elaboration article discusses each checklist item and gives methodological background and published examples of transparent reporting. The STROBE checklist is best used in conjunction with this article (freely available on the Web sites of PLoS Medicine at <http://www.plosmedicine.org/>, Annals of Internal Medicine at <http://www.annals.org/>, and Epidemiology at <http://www.epidem.com/>). Information on the STROBE Initiative is available at <http://www.strobe-statement.org>.
